# Supplementary material
Source: Royal Society of Chemistry journal article supplement (doi:10.1039/d6ob00365f)

## Supplementary Information

### First total synthesis and evaluation of the $\alpha$ -glucosidase inhibitory activity of ( $\pm$ )-methyl dihydromarmesinate, an anti-inflammatory phenylpropanoid from *Ficus hirta* Vahl., and related benzofurans

Paula K. Paz Armero,<sup>a,b</sup> Natalia L. Calvo,<sup>a,b</sup> Mario O. Salazar,<sup>b</sup> Ricardo L. E. Furlan,<sup>b</sup> Teodoro S. Kaufman<sup>b</sup> y Andrea B. J. Bracca<sup>b</sup>

<sup>a</sup>Instituto de Química Rosario “Dr. Edmundo A. Rúveda” (IQUIR, CONICET-UNR) and  
<sup>b</sup>Facultad de Ciencias Bioquímicas y Farmacéuticas, Universidad Nacional de Rosario, Suipacha 531, S2002LRK Rosario, República Argentina.

### Table of Contents

| Description                                                                                                                        | Page N° |
|------------------------------------------------------------------------------------------------------------------------------------|---------|
| <b>Figure S1.</b> 400 MHz <sup>1</sup> H (top) and 101 MHz <sup>13</sup> C (bottom) NMR spectra of <b>14</b> in CDCl <sub>3</sub>  | S3      |
| <b>Figure S2.</b> COSY (top) and HSQC (bottom) spectra of compound <b>14</b> in CDCl <sub>3</sub>                                  | S4      |
| <b>Figure S3.</b> HMBC spectra of compound <b>14</b> in CDCl <sub>3</sub>                                                          | S5      |
| <b>Figure S4.</b> 300 MHz <sup>1</sup> H (top) and 75 MHz <sup>13</sup> C (bottom) NMR spectra of <b>17</b> in CDCl <sub>3</sub>   | S6      |
| <b>Figure S5.</b> HSQC spectrum of compound <b>17</b> in CDCl <sub>3</sub>                                                         | S7      |
| <b>Figure S6.</b> 300 MHz <sup>1</sup> H (top) and 75 MHz <sup>13</sup> C (bottom) NMR spectra of <b>19</b> in CDCl <sub>3</sub>   | S8      |
| <b>Figure S7.</b> HSQC (top) and HMBC (bottom) spectra of compound <b>19</b> in CDCl <sub>3</sub>                                  | S9      |
| <b>Figure S8.</b> 300 MHz <sup>1</sup> H (top) and 75 MHz <sup>13</sup> C (bottom) NMR spectra of <b>22</b> in CDCl <sub>3</sub>   | S10     |
| <b>Figure S9.</b> HSQC (top) and HMBC (bottom) spectra of compound <b>22</b> in CDCl <sub>3</sub>                                  | S11     |
| <b>Figure S10.</b> 400 MHz <sup>1</sup> H (top) and 101 MHz <sup>13</sup> C (bottom) NMR spectra of <b>24</b> in CDCl <sub>3</sub> | S12     |
| <b>Figure S11.</b> COSY (top) and HSQC (bottom) spectra of compound <b>24</b> in CDCl <sub>3</sub>                                 | S13     |
| <b>Figure S12.</b> HMBC spectrum of compound <b>24</b> in CDCl <sub>3</sub>                                                        | S14     |
| <b>Figure S13.</b> 400 MHz <sup>1</sup> H (top) and 101 MHz <sup>13</sup> C (bottom) NMR spectra of <b>27</b> in CDCl <sub>3</sub> | S15     |
| <b>Figure S14.</b> COSY (top) and HSQC (bottom) spectra of compound <b>27</b> in CDCl <sub>3</sub>                                 | S16     |
| <b>Figure S15.</b> HMBC spectrum of compound <b>27</b> in CDCl <sub>3</sub>                                                        | S17     |
| <b>Figure S16.</b> 400 MHz <sup>1</sup> H (top) and 101 MHz <sup>13</sup> C (bottom) NMR spectra of <b>28</b> in CDCl <sub>3</sub> | S18     |
| <b>Figure S17.</b> COSY (top) and HSQC (bottom) spectra of compound <b>28</b> in CDCl <sub>3</sub>                                 | S19     |

|                                                                                                                                       |     |
|---------------------------------------------------------------------------------------------------------------------------------------|-----|
| <b>Figure S18.</b> HMBC spectrum of compound <b>28</b> in CDCl <sub>3</sub>                                                           | S20 |
| <b>Figure S19.</b> 400 MHz <sup>1</sup> H (top) and 101 MHz <sup>13</sup> C (bottom) NMR spectra of <b>20</b> in CDCl <sub>3</sub>    | S21 |
| <b>Figure S20.</b> COSY (top) and HSQC (bottom) spectra of compound <b>20</b> in CDCl <sub>3</sub>                                    | S22 |
| <b>Figure S21.</b> HMBC spectrum of compound <b>20</b> in CDCl <sub>3</sub>                                                           | S23 |
| <b>Figure S22.</b> 400 MHz <sup>1</sup> H (top) and 101 MHz <sup>13</sup> C (bottom) NMR spectra of <b>21</b> in CDCl <sub>3</sub>    | S24 |
| <b>Figure S23.</b> COSY (top) and HSQC (bottom) spectra of compound <b>21</b> in CDCl <sub>3</sub>                                    | S25 |
| <b>Figure S24.</b> HMBC spectrum of compound <b>21</b> in CDCl <sub>3</sub>                                                           | S26 |
| <b>Figure S25.</b> 300 MHz <sup>1</sup> H (top) and 75 MHz <sup>13</sup> C (bottom) NMR spectra of <b>23</b> in CDCl <sub>3</sub> .   | S27 |
| <b>Figure S26.</b> HSQC (top) and HMBC (bottom) spectra of compound <b>23</b> in CDCl <sub>3</sub> .                                  | S28 |
| <b>Figure S27.</b> 400 MHz <sup>1</sup> H (top) and 101 MHz <sup>13</sup> C (bottom) NMR spectra of <b>29</b> in CDCl <sub>3</sub>    | S29 |
| <b>Figure S28.</b> COSY (top) and HSQC (bottom) spectra of compound <b>29</b> in CDCl <sub>3</sub>                                    | S30 |
| <b>Figure S29.</b> HMBC spectrum of compound <b>29</b> in CDCl <sub>3</sub>                                                           | S31 |
| <b>Figure S30.</b> 400 MHz <sup>1</sup> H (top) and 101 MHz <sup>13</sup> C (bottom) NMR spectra of <b>30</b> in CDCl <sub>3</sub>    | S32 |
| <b>Figure S31.</b> COSY (top) and HSQC (bottom) spectra of compound <b>30</b> in CDCl <sub>3</sub>                                    | S33 |
| <b>Figure S32.</b> HMBC spectrum of compound <b>30</b> in CDCl <sub>3</sub>                                                           | S34 |
| <b>Figure S33.</b> 400 MHz <sup>1</sup> H (top) and 101 MHz <sup>13</sup> C (bottom) NMR spectra of <b>1</b> in CDCl <sub>3</sub>     | S35 |
| <b>Figure S34.</b> COSY (top) and HSQC (bottom) spectra of compound <b>1</b> in CDCl <sub>3</sub>                                     | S36 |
| <b>Figure S35.</b> HMBC spectrum of compound <b>1</b> in CDCl <sub>3</sub>                                                            | S37 |
| <b>Figure S36.</b> 400 MHz <sup>1</sup> H (top) and 101 MHz <sup>13</sup> C (bottom) NMR spectra of <b>31</b> in CDCl <sub>3</sub>    | S38 |
| <b>Figure S37.</b> COSY (top) and HSQC (bottom) spectra of compound <b>31</b> in CDCl <sub>3</sub>                                    | S39 |
| <b>Figure S38.</b> HMBC spectrum of compound <b>31</b> in CDCl <sub>3</sub>                                                           | S40 |
| <b>Figure S39.</b> 400 MHz <sup>1</sup> H (top) and 101 MHz <sup>13</sup> C (bottom) NMR spectra of <b>32a,b</b> in CDCl <sub>3</sub> | S41 |
| <b>Figure S40.</b> 400 MHz <sup>1</sup> H (top) and 101 MHz <sup>13</sup> C (bottom) NMR spectra of <b>34</b> in CDCl <sub>3</sub>    | S42 |
| <b>Figure S41.</b> COSY (top) and HSQC (bottom) spectra of compound <b>34</b> in CDCl <sub>3</sub>                                    | S43 |
| <b>Figure S42.</b> HMBC spectrum of compound <b>34</b> in CDCl <sub>3</sub>                                                           | S44 |
| <b>Table S1.</b> Comparison of <sup>1</sup> H and <sup>13</sup> C NMR spectra of the natural and synthetic products                   | S45 |
| <b>Table S2.</b> Crystal data and structure refinement for compound <b>27</b>                                                         | S46 |
| <b>Tables S3-6.</b> Crystallographic data of compound <b>27</b> (bond lengths, angles, dihedrals, H-bonds)                            | S47 |
| <b>Figure S35.</b> Supramolecular structure of compound <b>27</b>                                                                     | S52 |
| <b>Figure S36.</b> Compound <b>27</b> at 5 × magnification, under white (A) and polarized (B) light                                   | S53 |
| CheckCIF/Platon Report                                                                                                                | S54 |

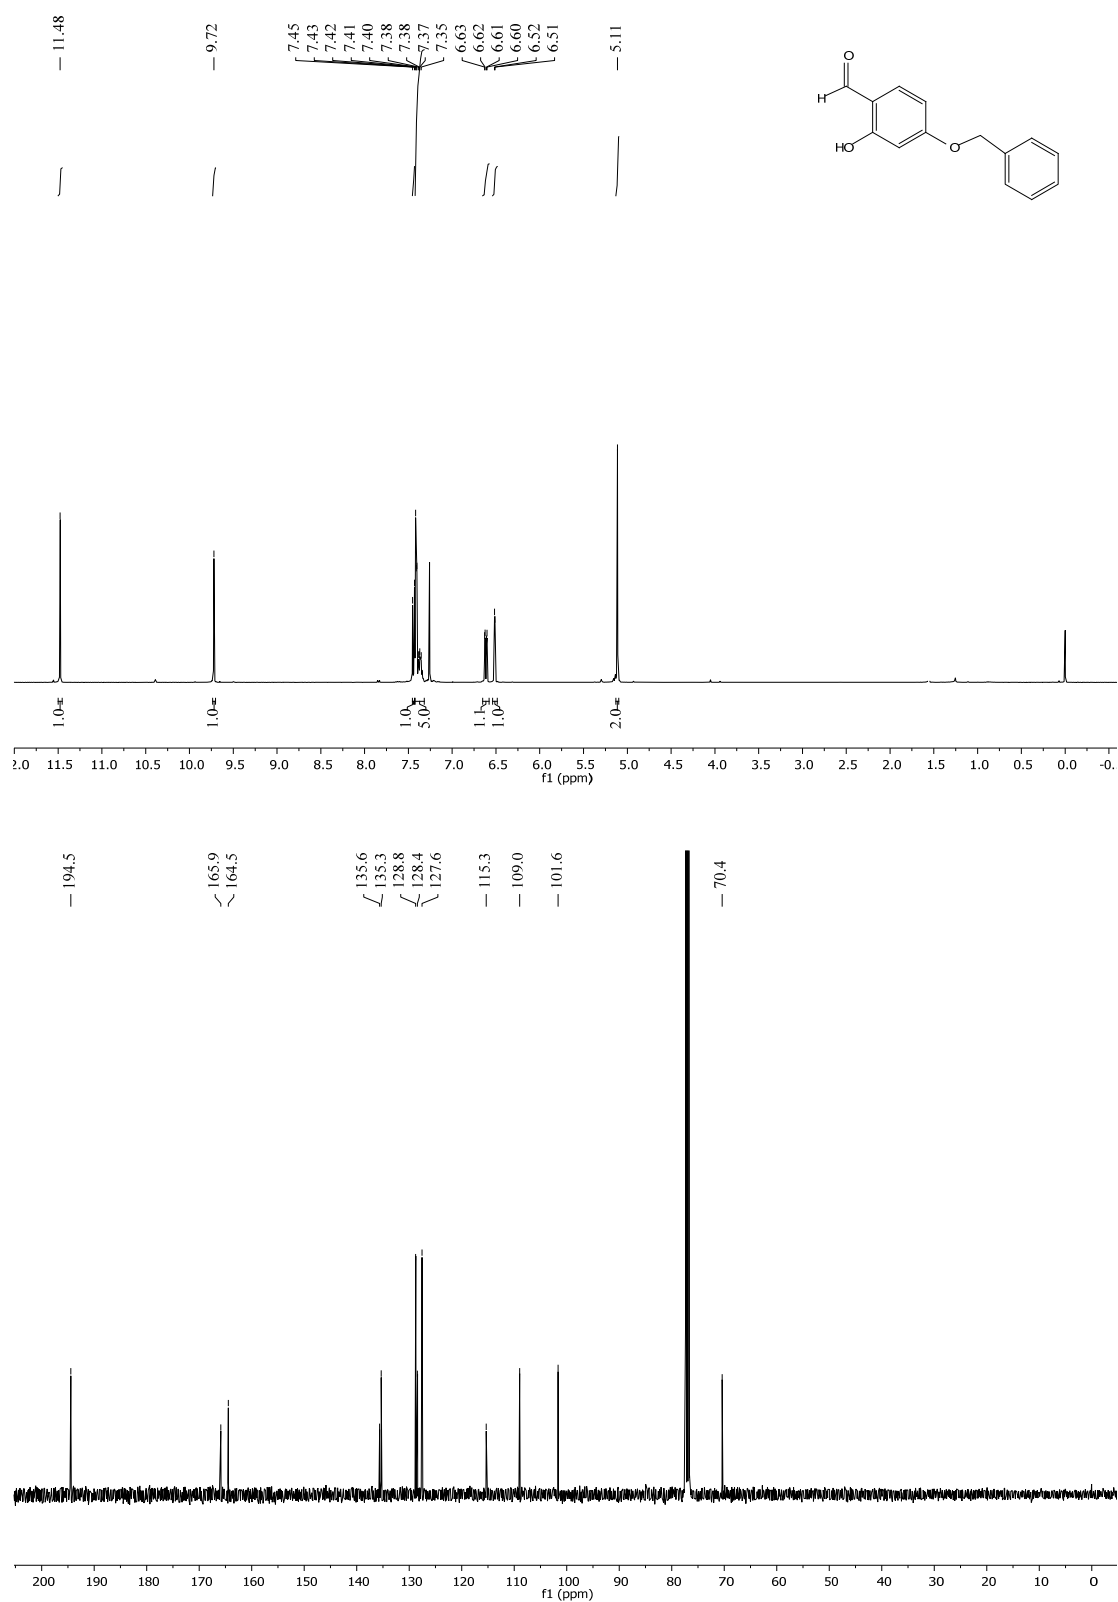

Figure S1. 400 MHz <sup>1</sup>H (top) and 101 MHz <sup>13</sup>C (bottom) NMR spectra of 14 in CDCl<sub>3</sub>.

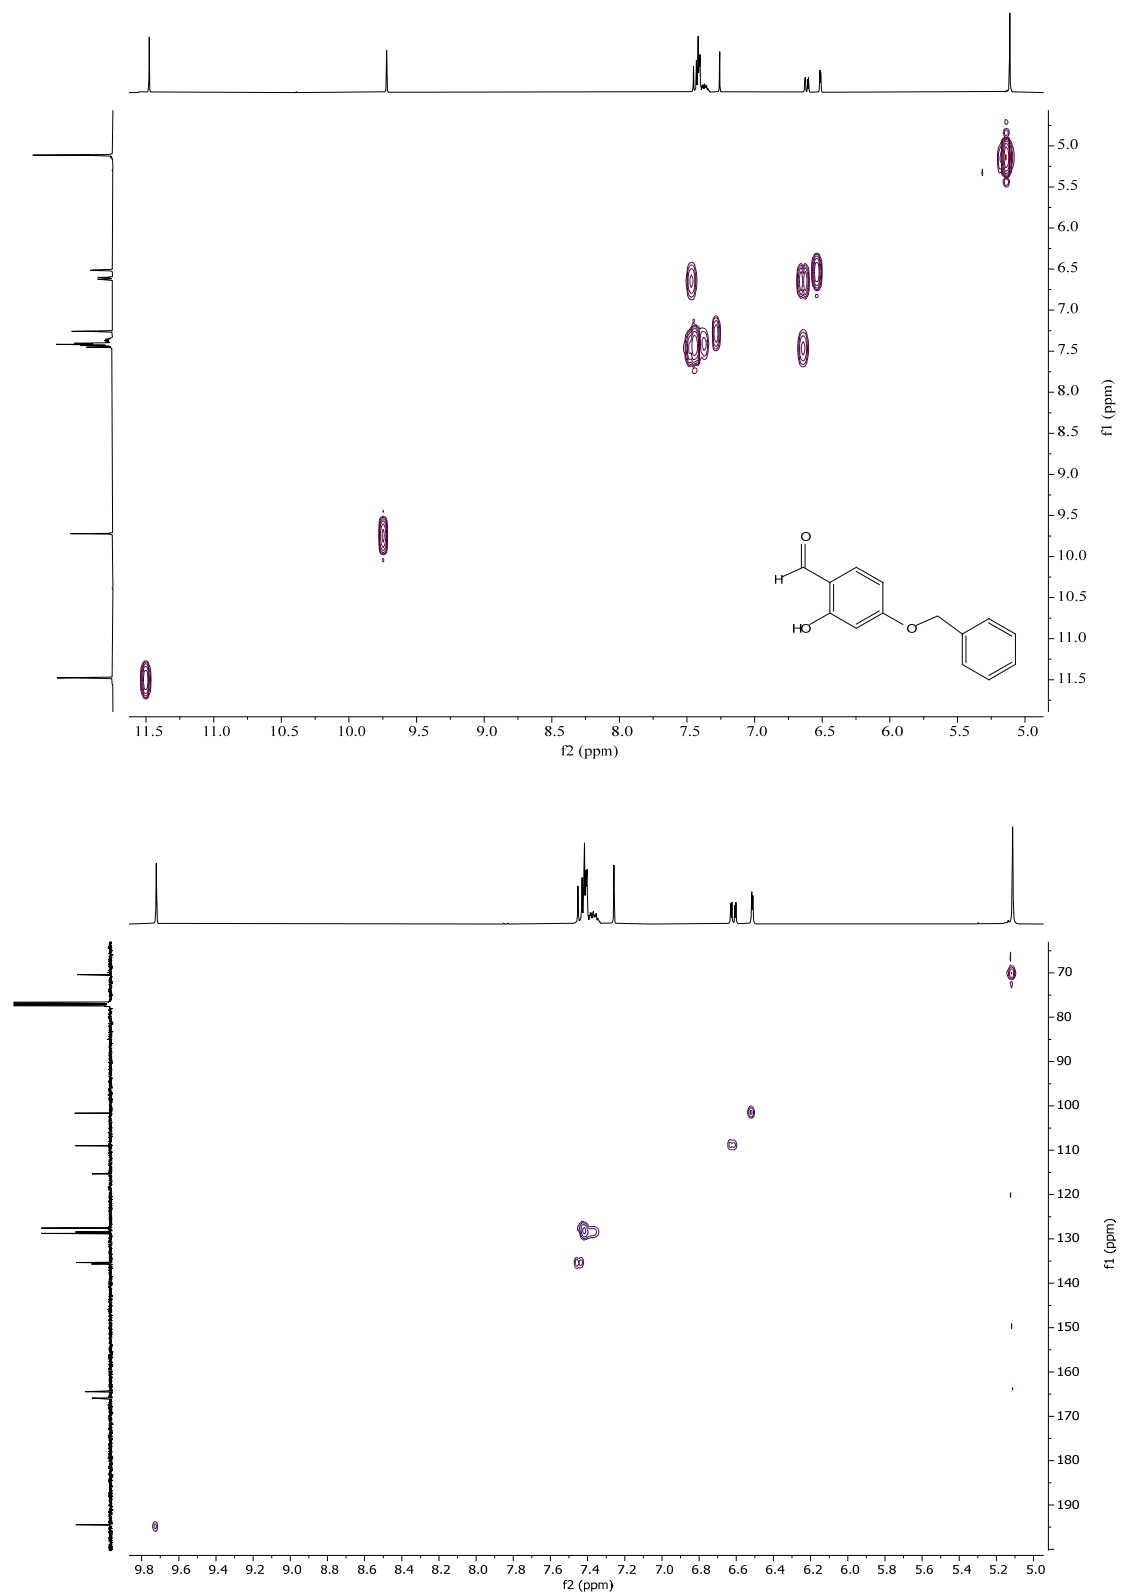

Figure S2. COSY (top) and HSQC (bottom) spectra of compound 14 in CDCl<sub>3</sub>.

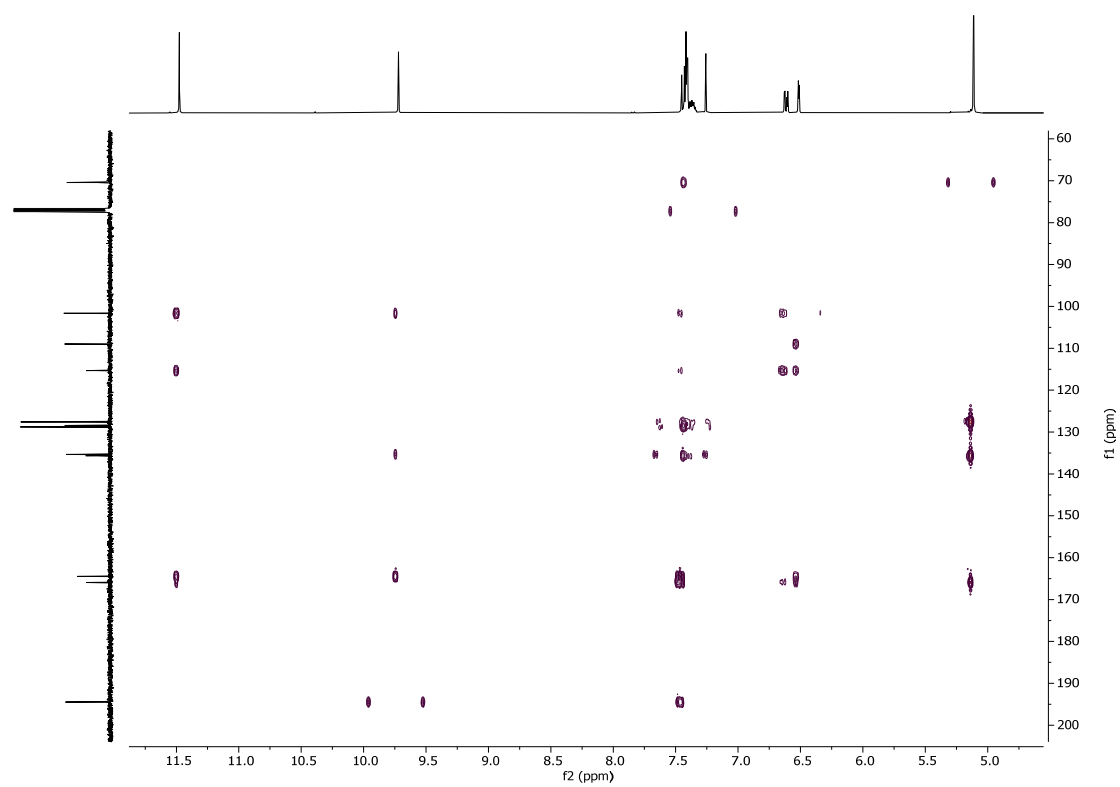

Figure S3. HMBC spectrum of compound 14 in CDCl<sub>3</sub>.

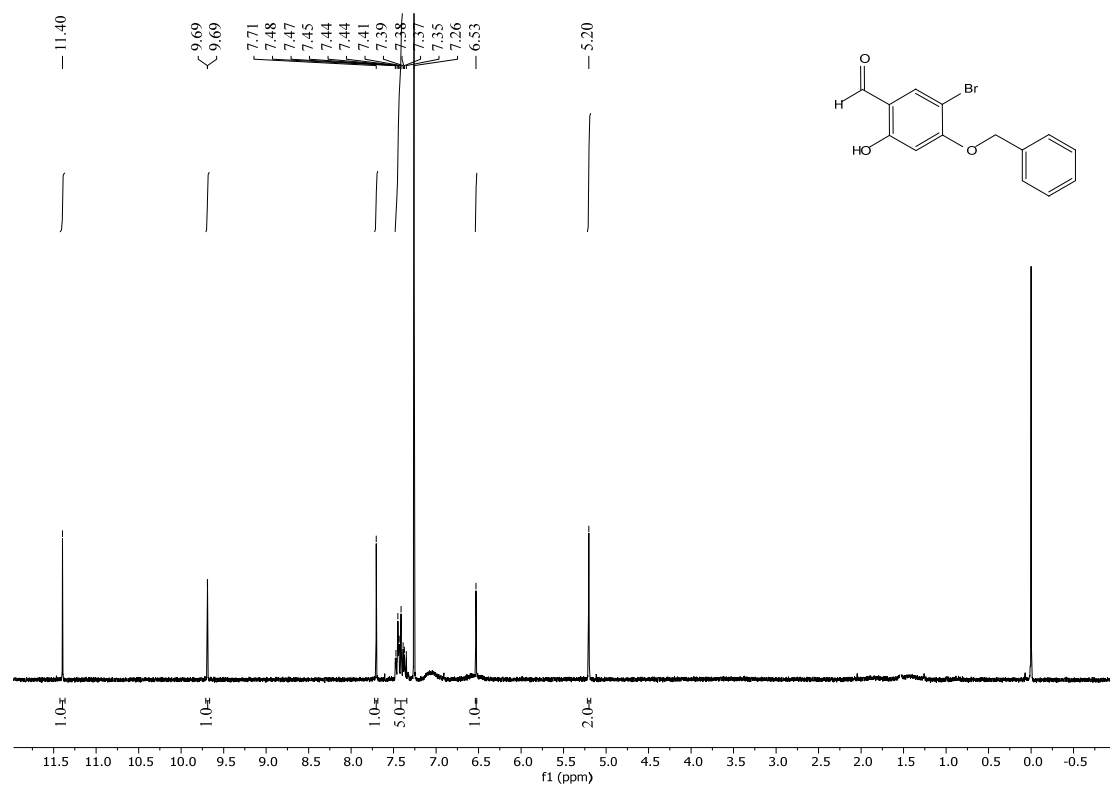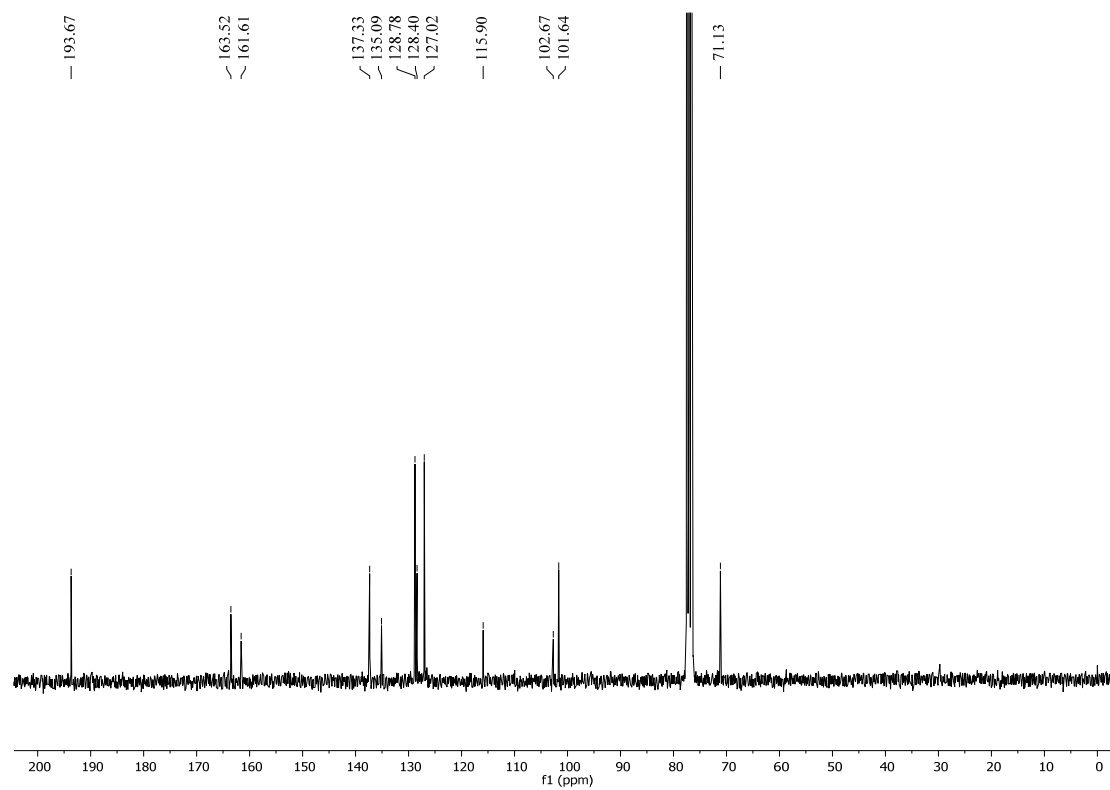

Figure S4. 300 MHz  $^1\text{H}$  (top) and 75 MHz  $^{13}\text{C}$  (bottom) NMR spectra of **17** in  $\text{CDCl}_3$ .

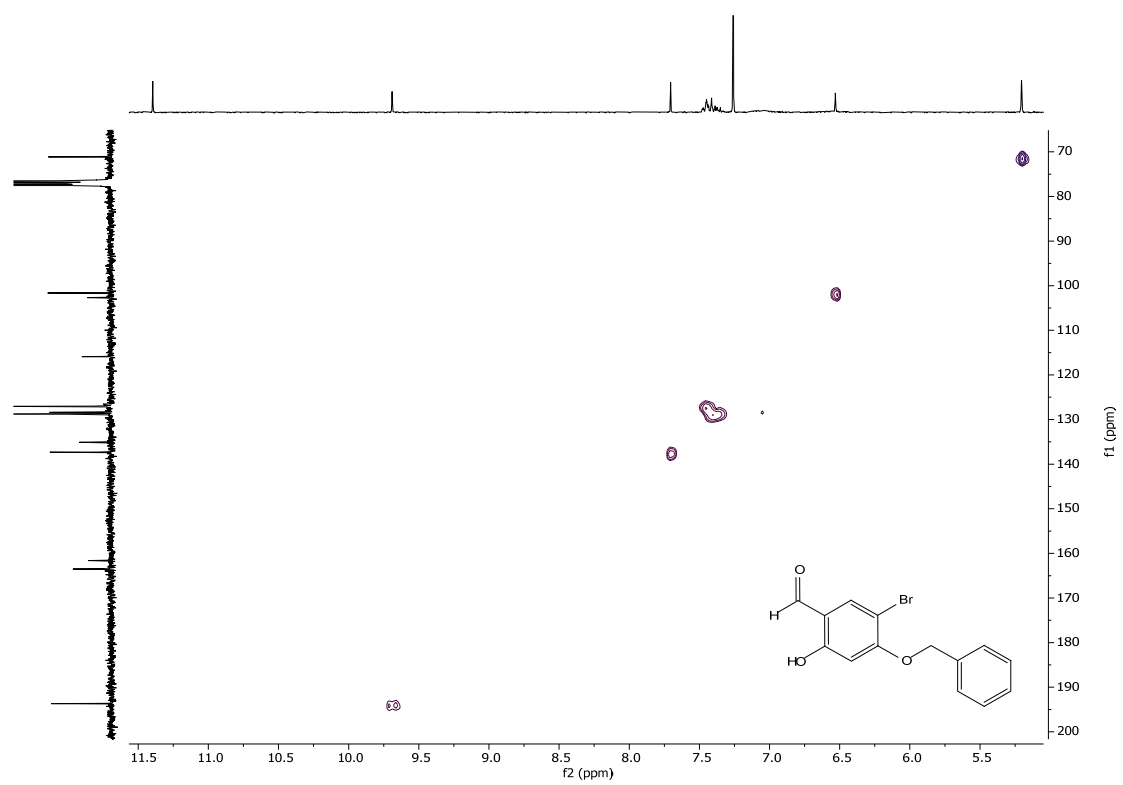

Figure S5. HSQC spectrum of compound 17 in CDCl<sub>3</sub>.

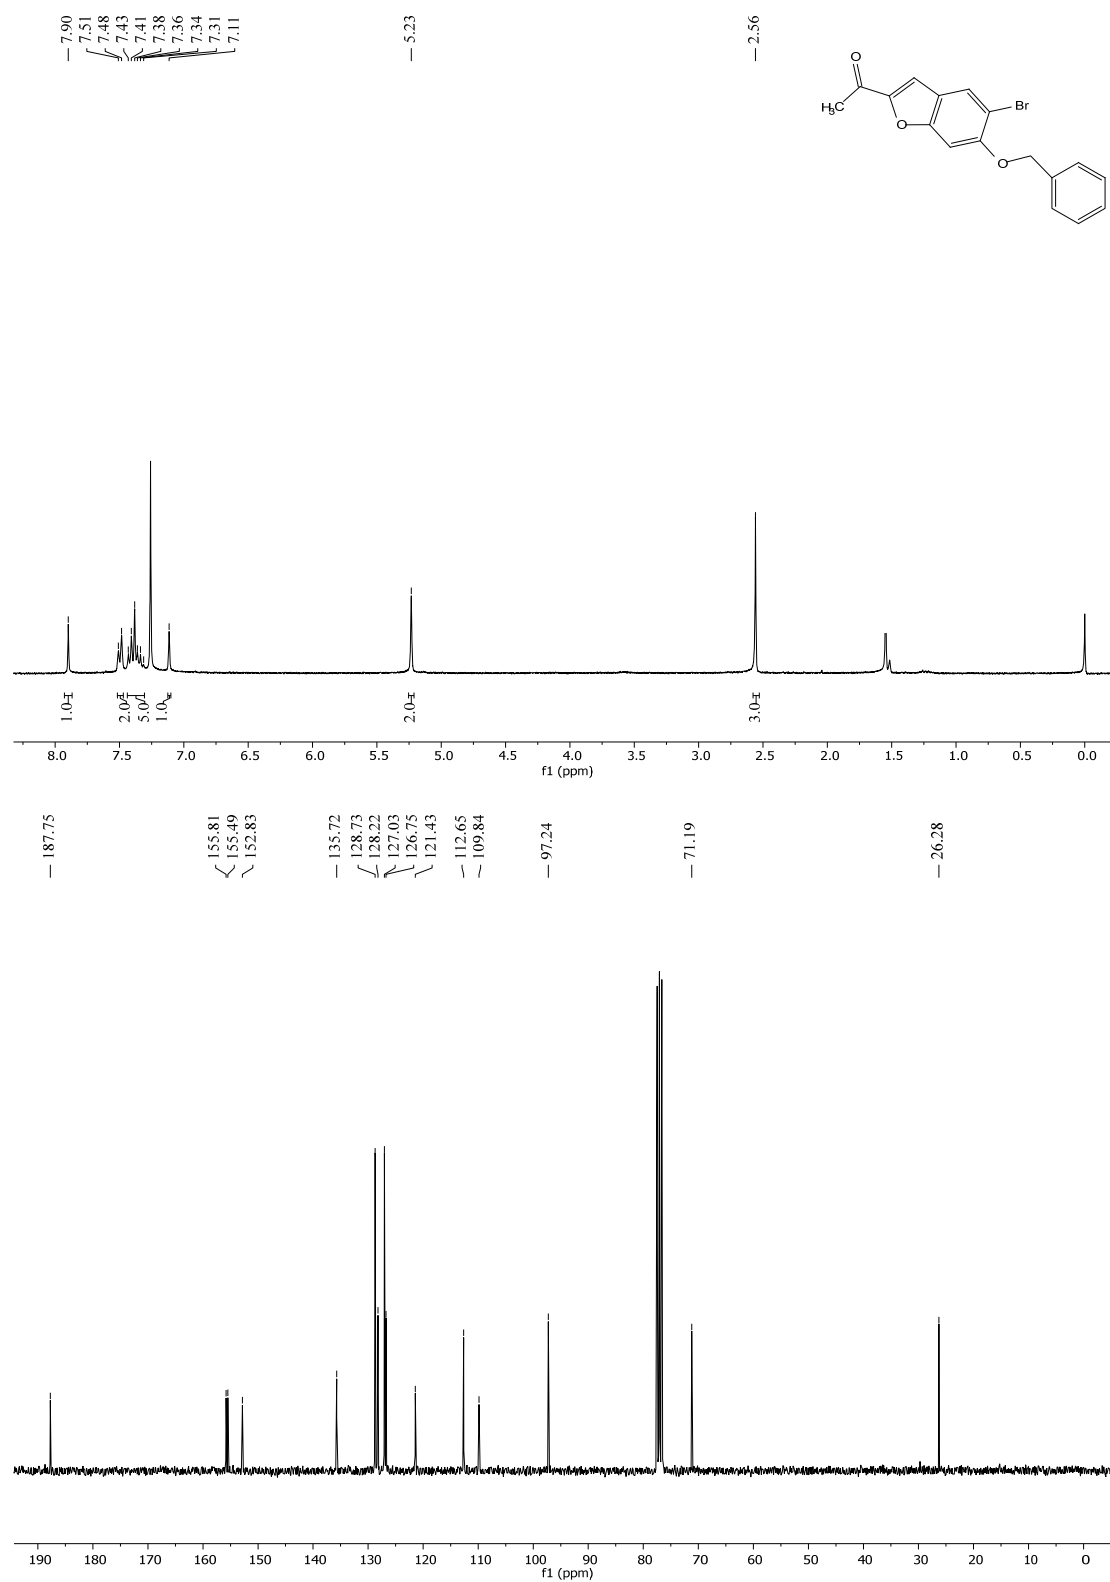

Figure S6. 300 MHz <sup>1</sup>H (top) and 75 MHz <sup>13</sup>C (bottom) NMR spectra of **19** in CDCl<sub>3</sub>.

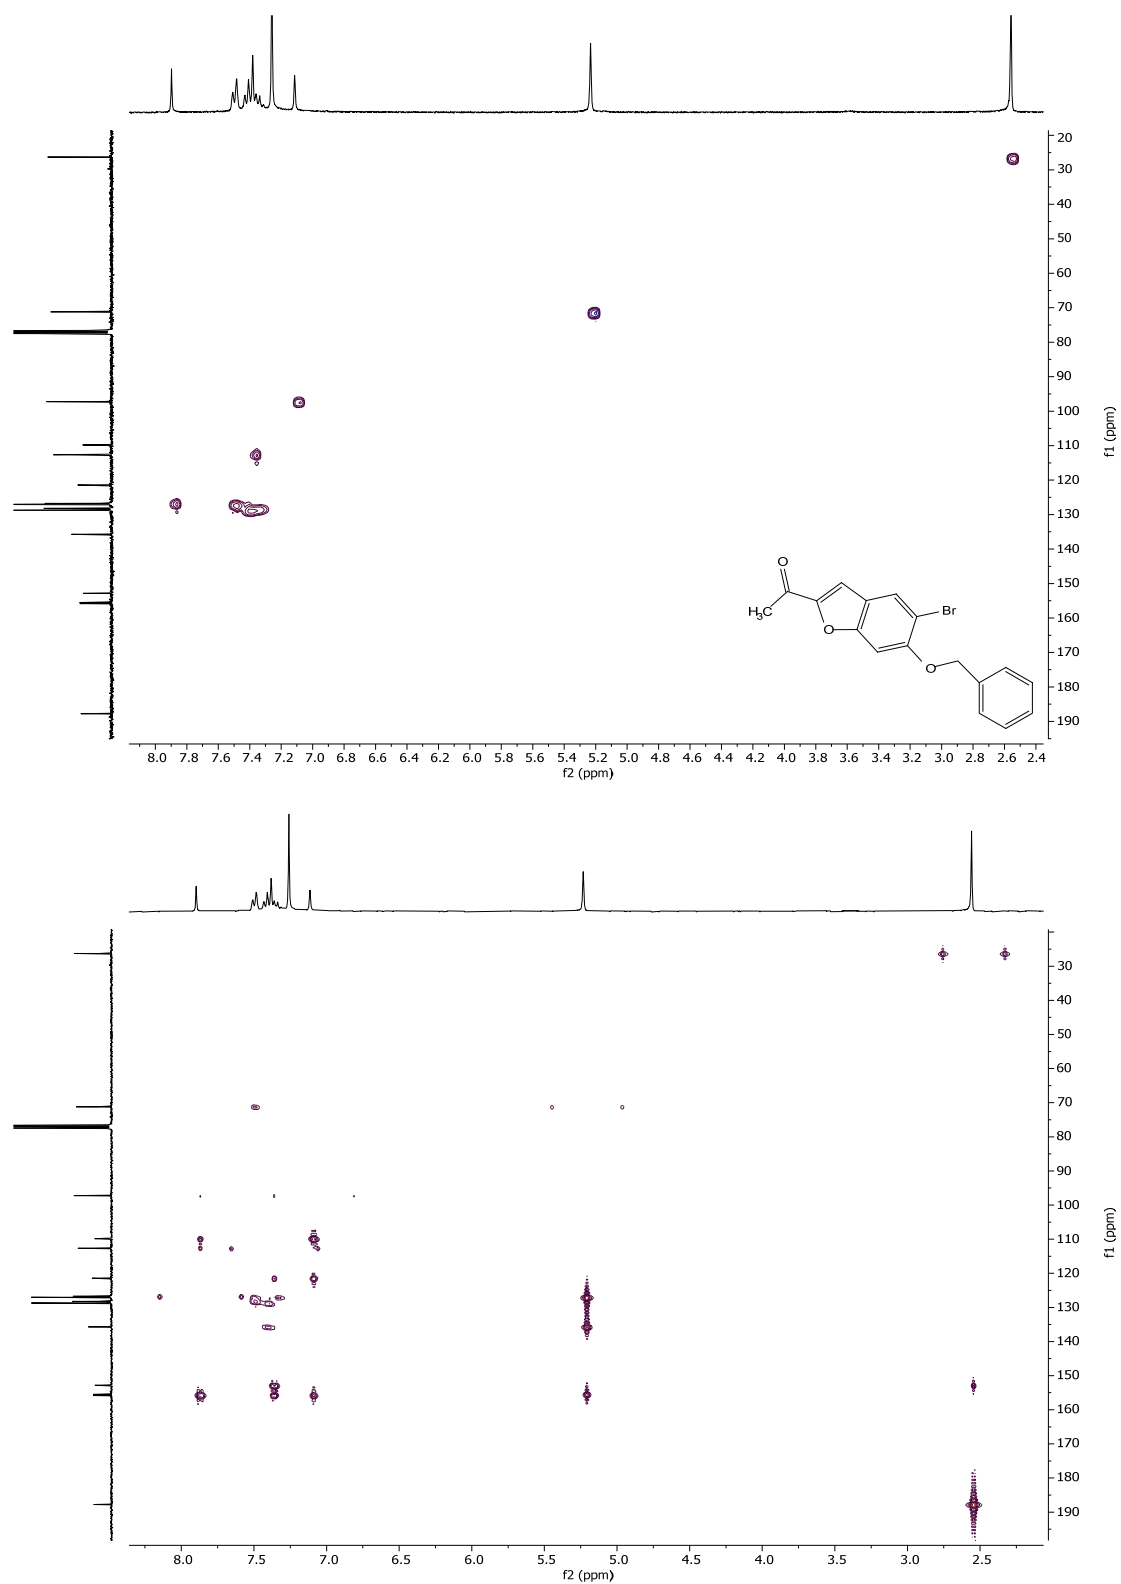

Figure S7. HSQC (top) and HMBC (bottom) spectra of compound **19** in CDCl<sub>3</sub>.

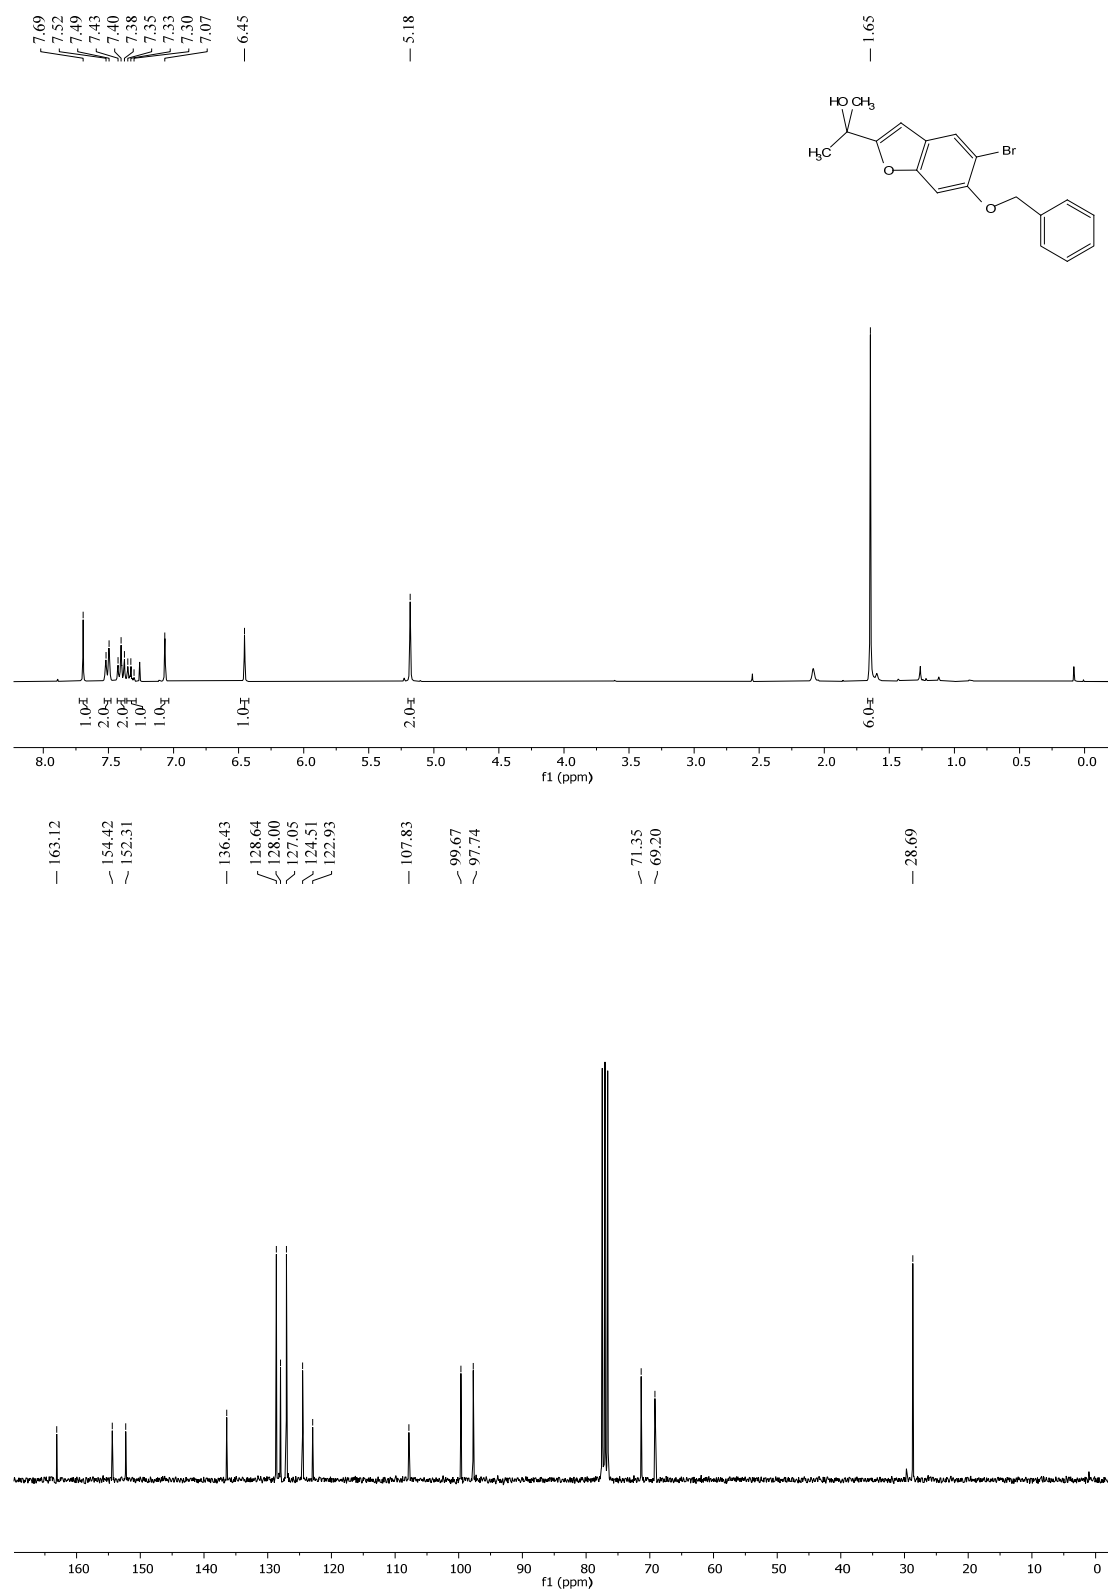

**Figure S8.** 300 MHz <sup>1</sup>H (top) and 75 MHz <sup>13</sup>C (bottom) NMR spectra of **22** in CDCl<sub>3</sub>.

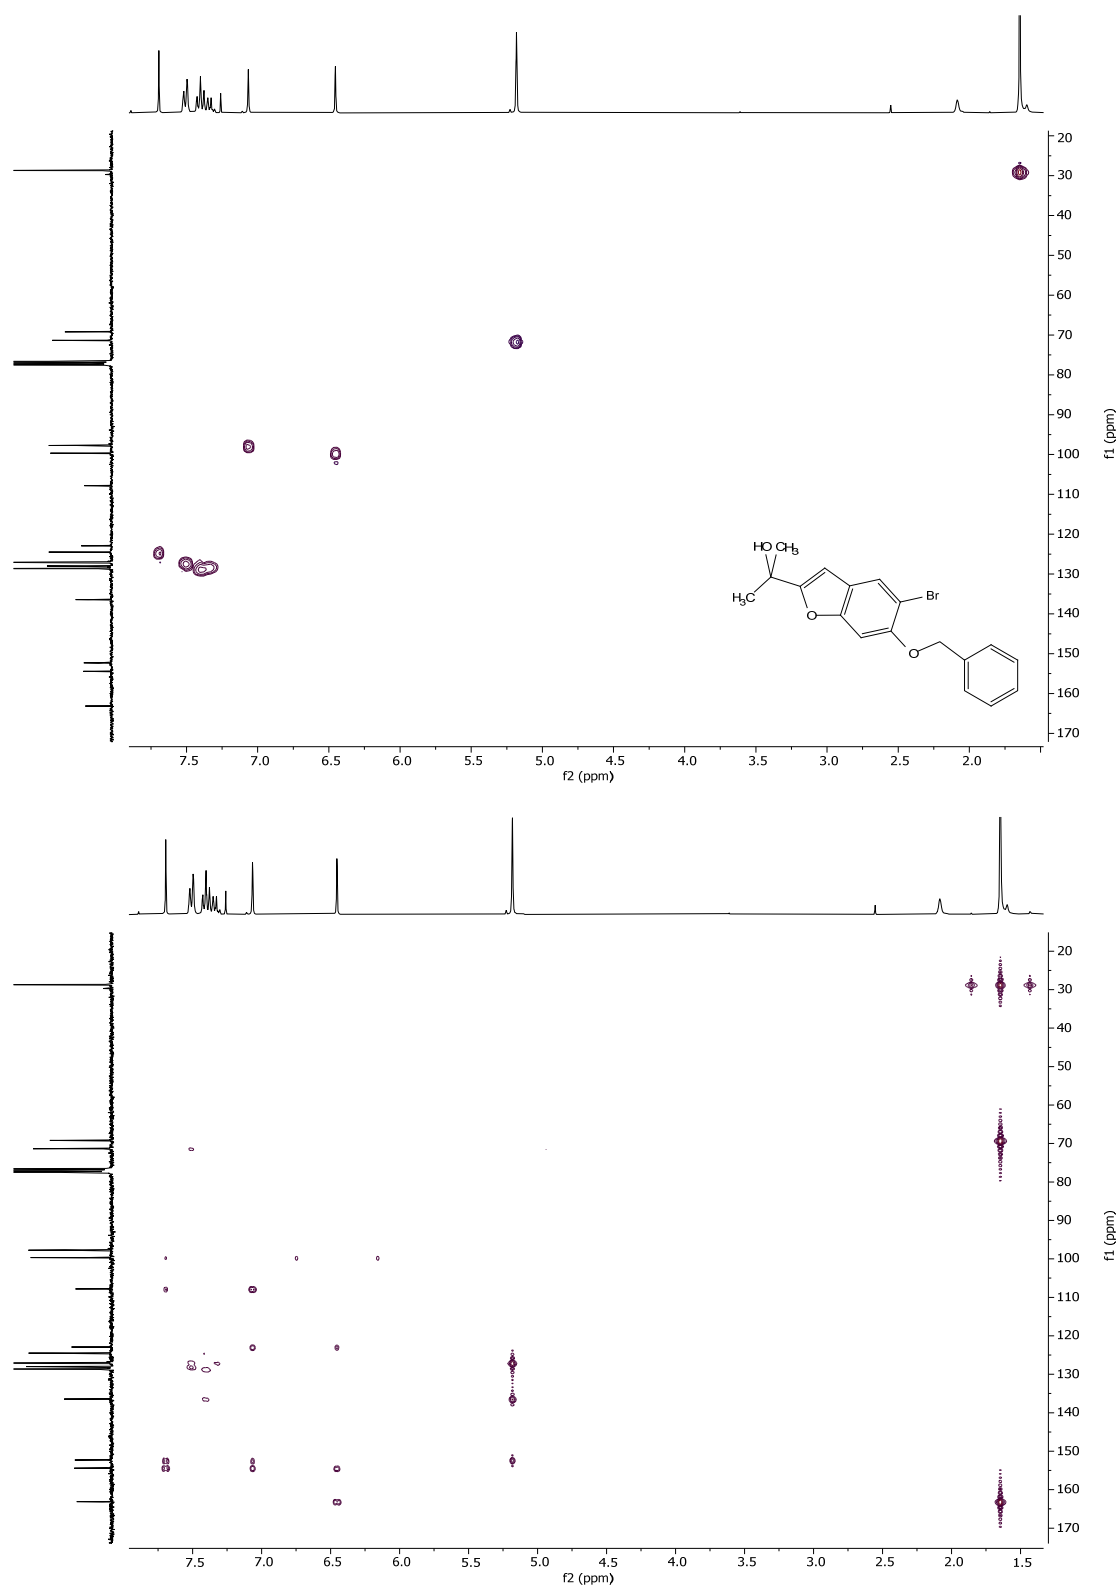

Figure S9. HSQC (top) and HMBC (bottom) spectra of compound **22** in CDCl<sub>3</sub>.

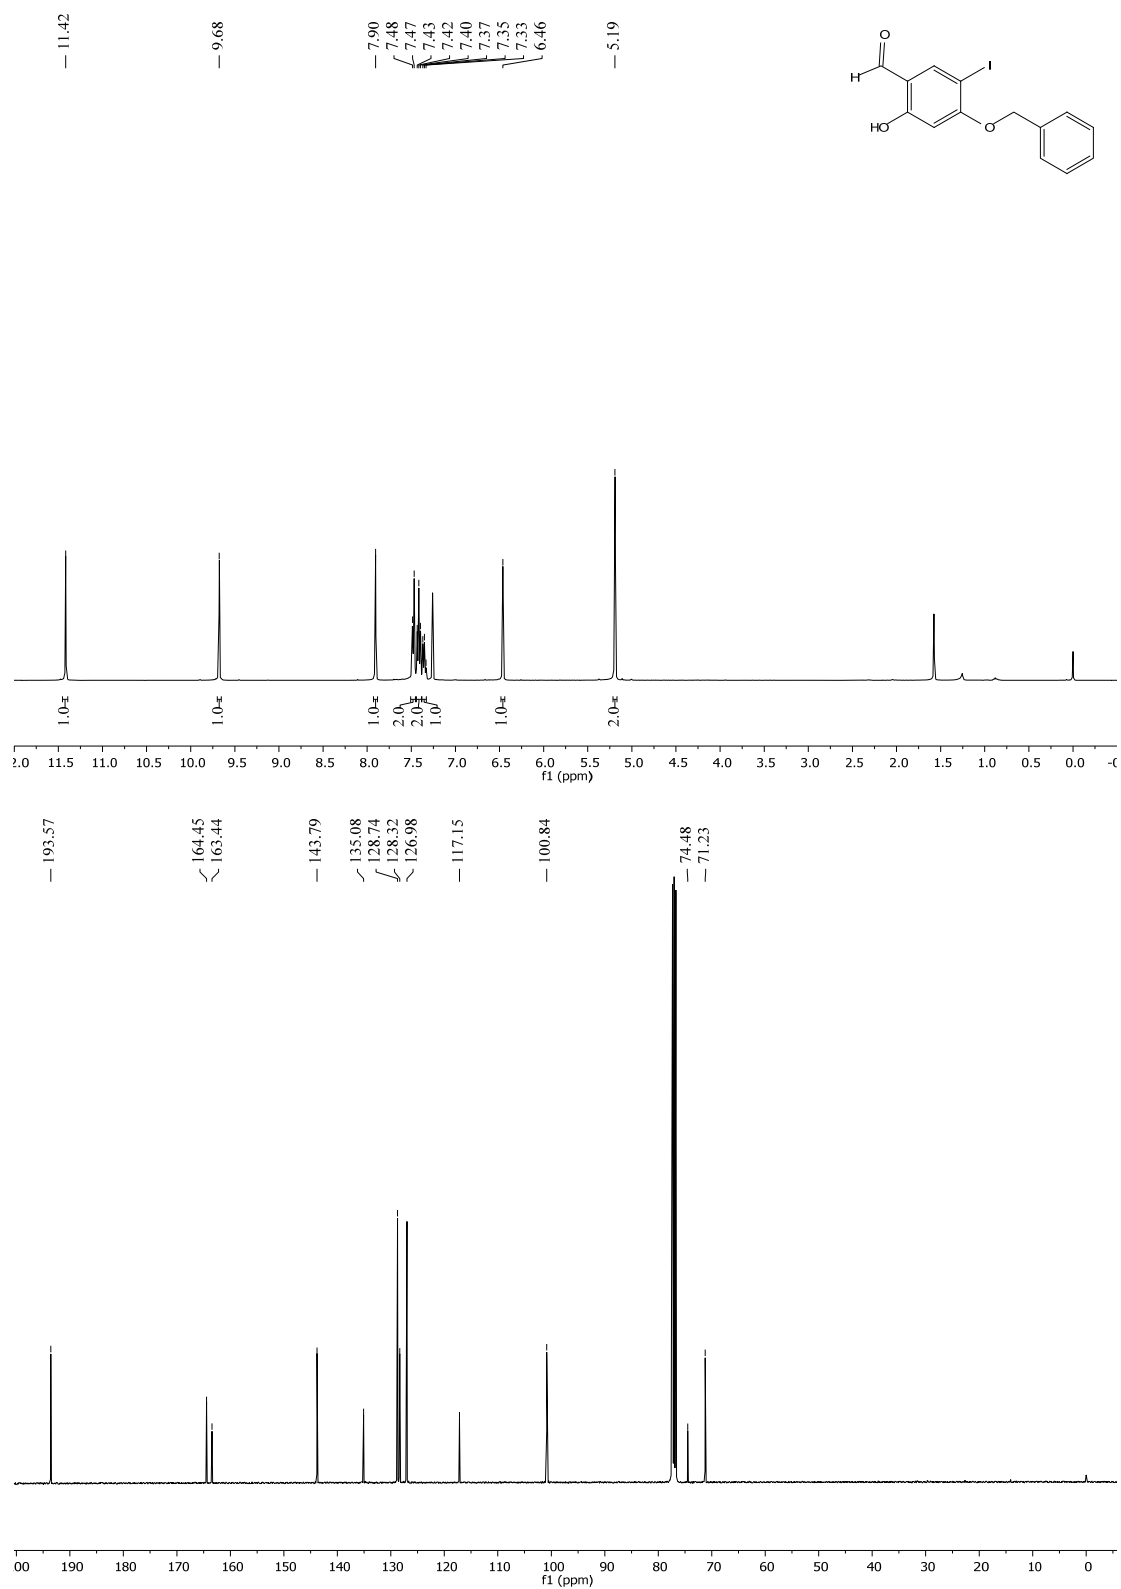

Figure S10. 400 MHz <sup>1</sup>H (top) and 101 MHz <sup>13</sup>C (bottom) NMR spectra of **24** in CDCl<sub>3</sub>.

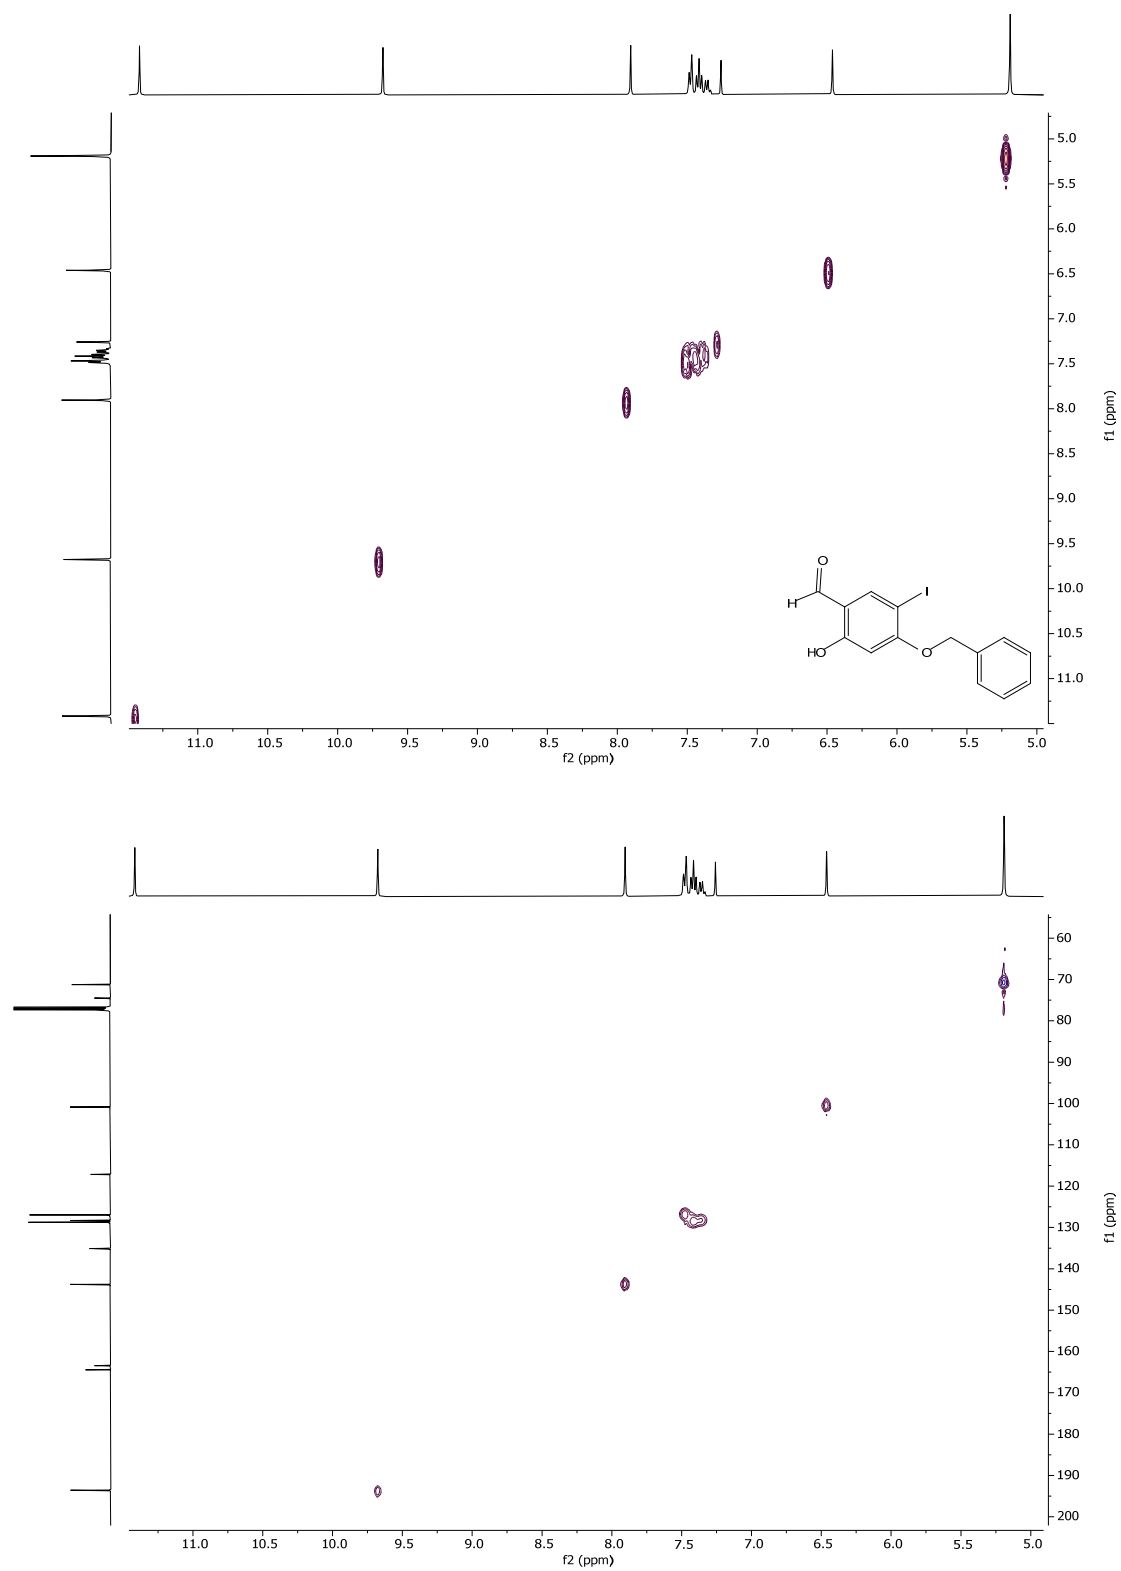

**Figure S11.** COSY (top) and HSQC (bottom) spectra of compound **24** in  $\text{CDCl}_3$ .

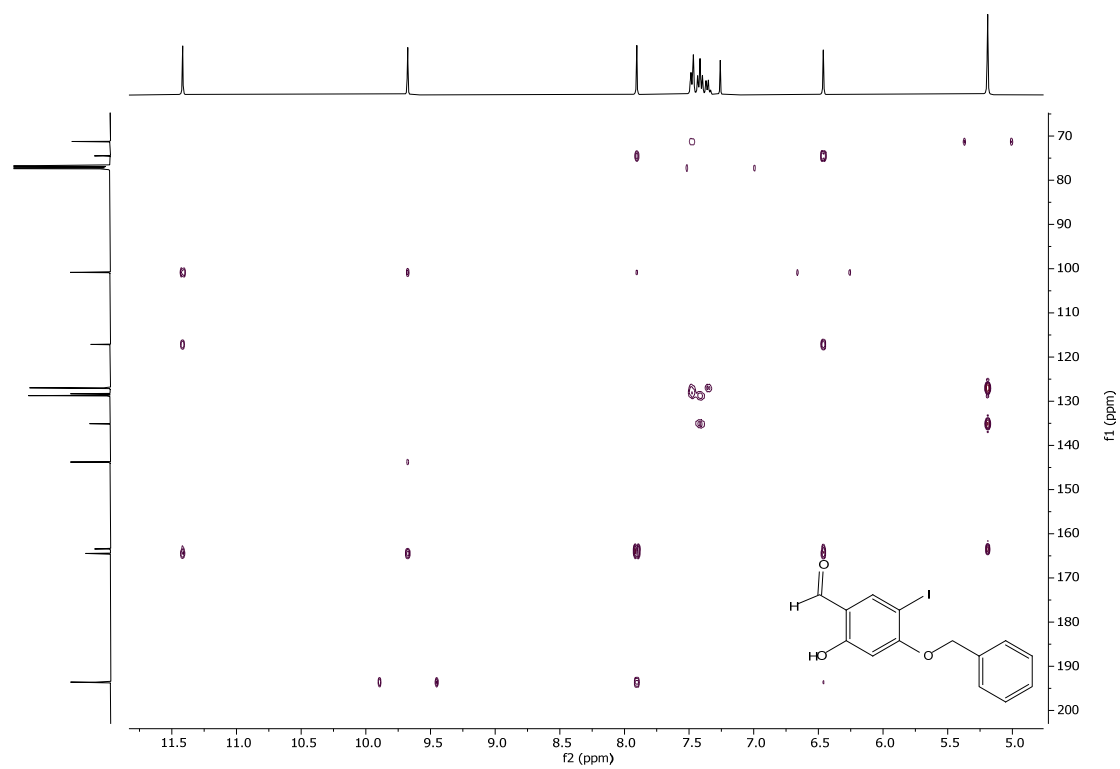

**Figure S12.** HMBC spectrum of compound **24** in  $\text{CDCl}_3$ .

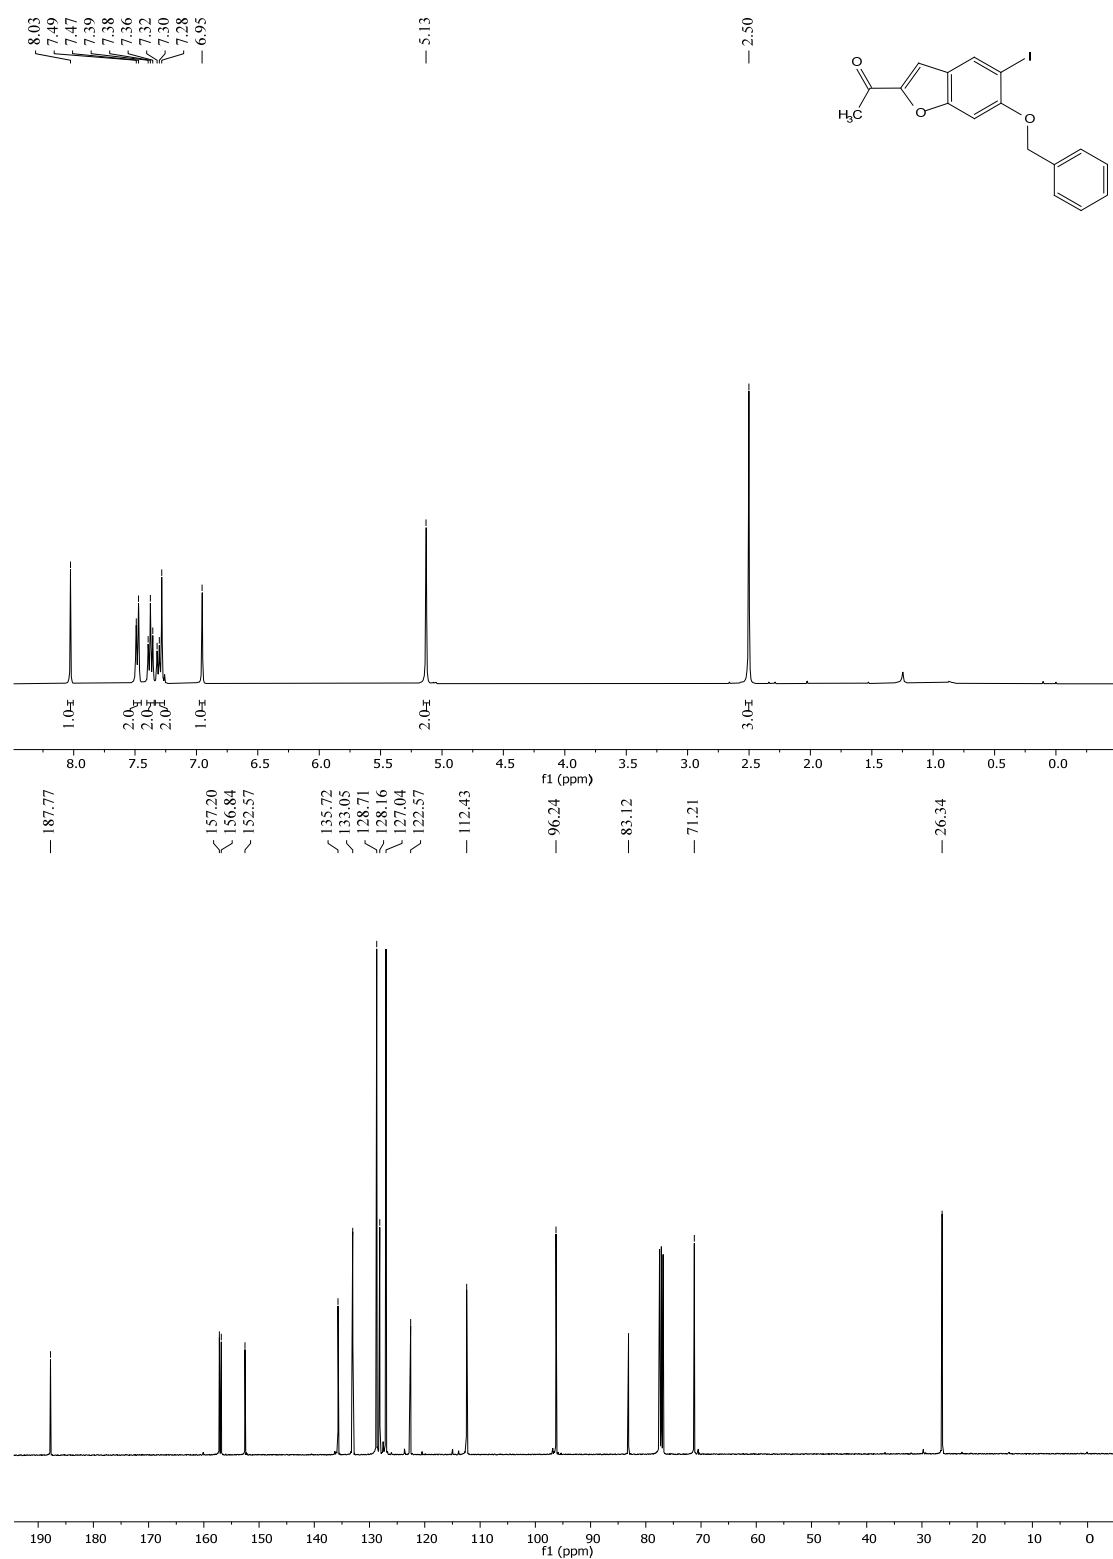

**Figure S13.** 400 MHz <sup>1</sup>H (top) and 101 MHz <sup>13</sup>C (bottom) NMR spectra of **27** in CDCl<sub>3</sub>.

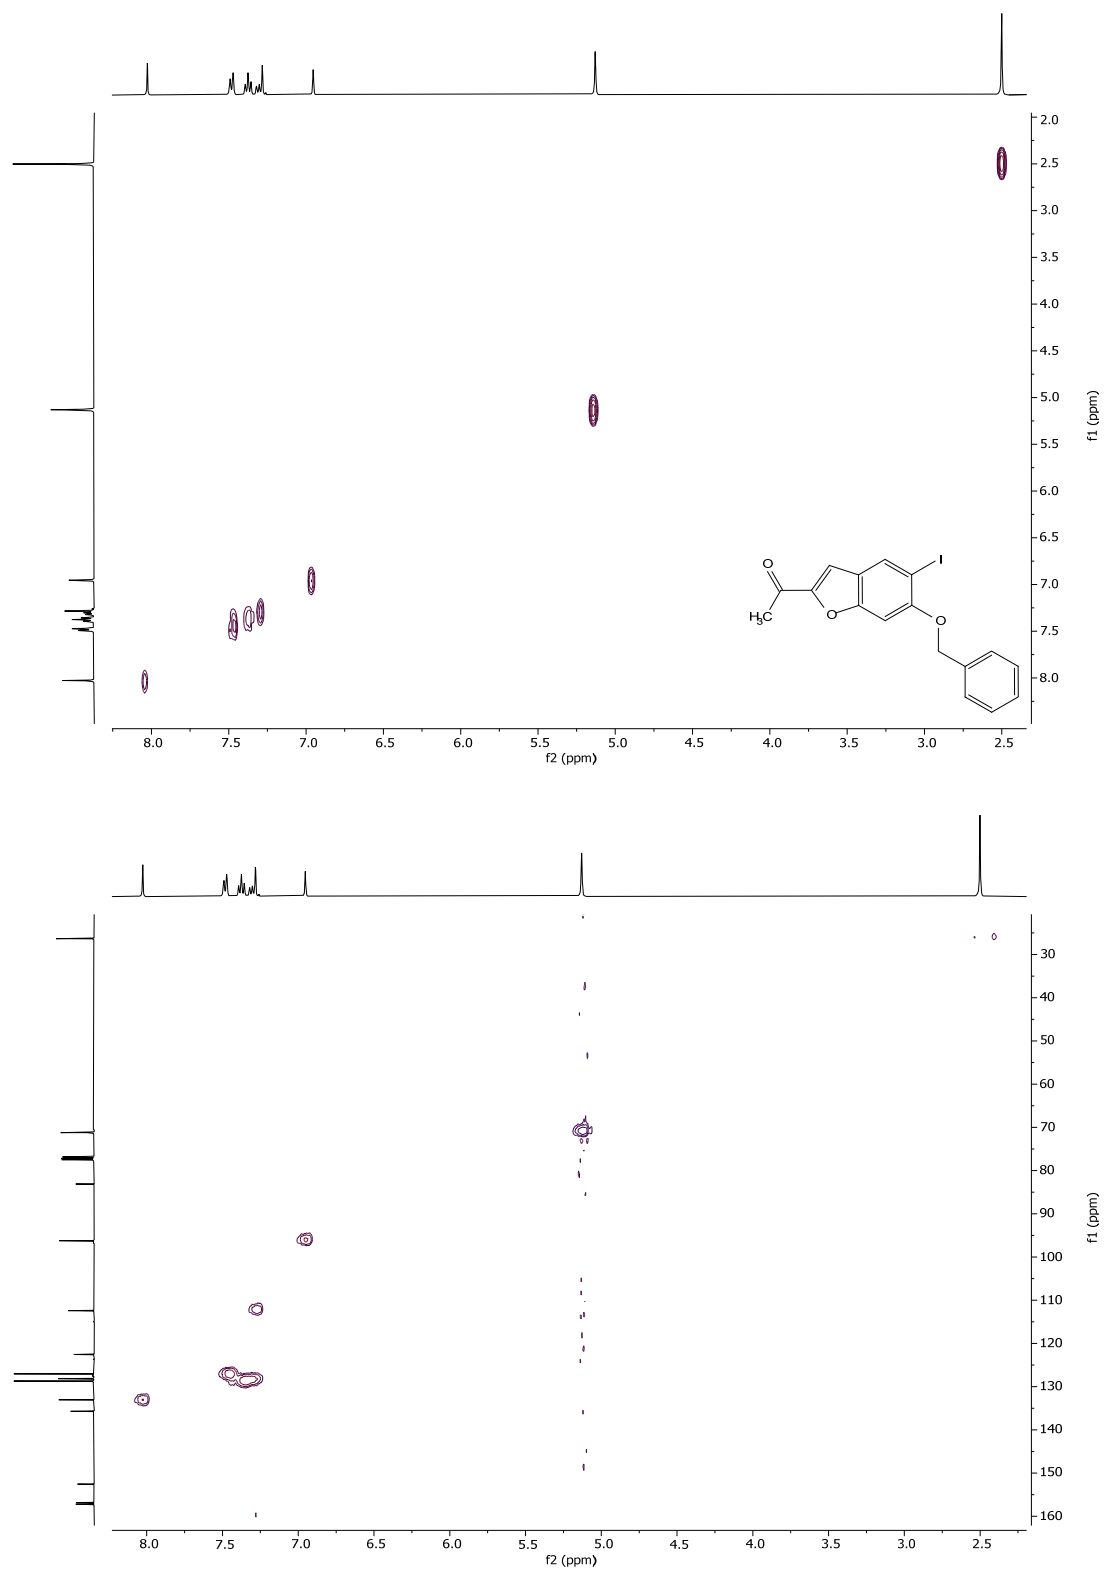

**Figure S14.** COSY (top) and HSQC (bottom) spectra of compound **27** in CDCl<sub>3</sub>.

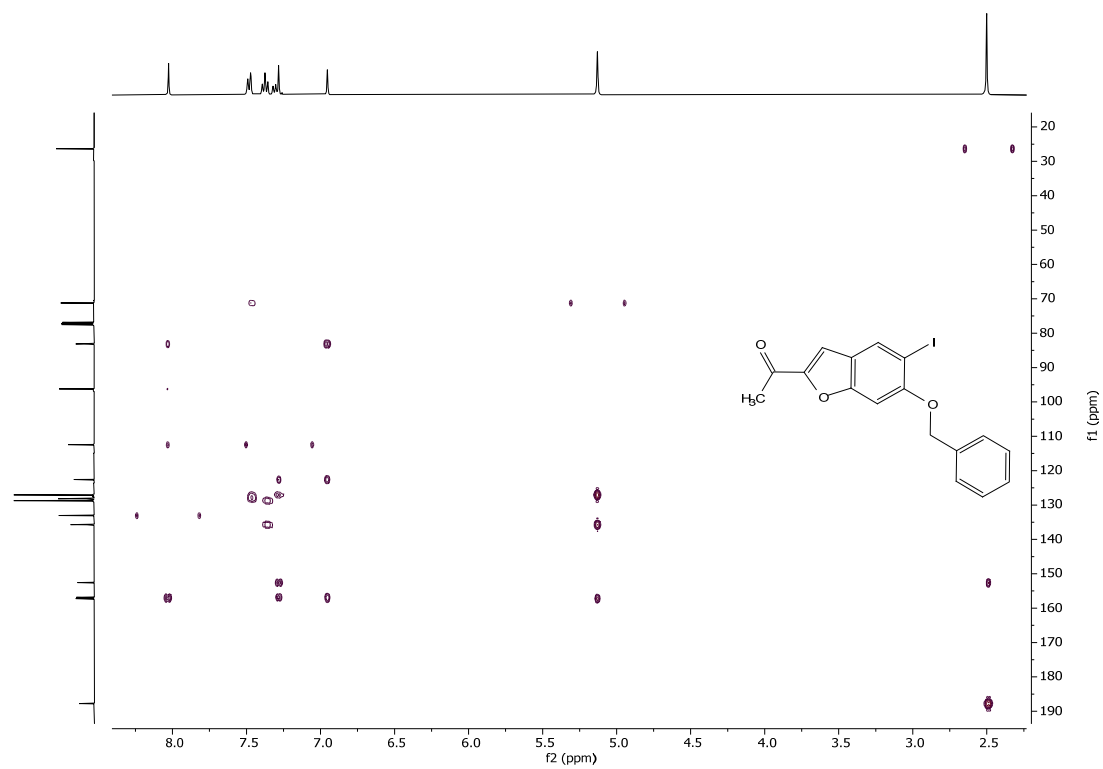

Figure S15. HMBC spectrum of compound 27 in  $\text{CDCl}_3$ .

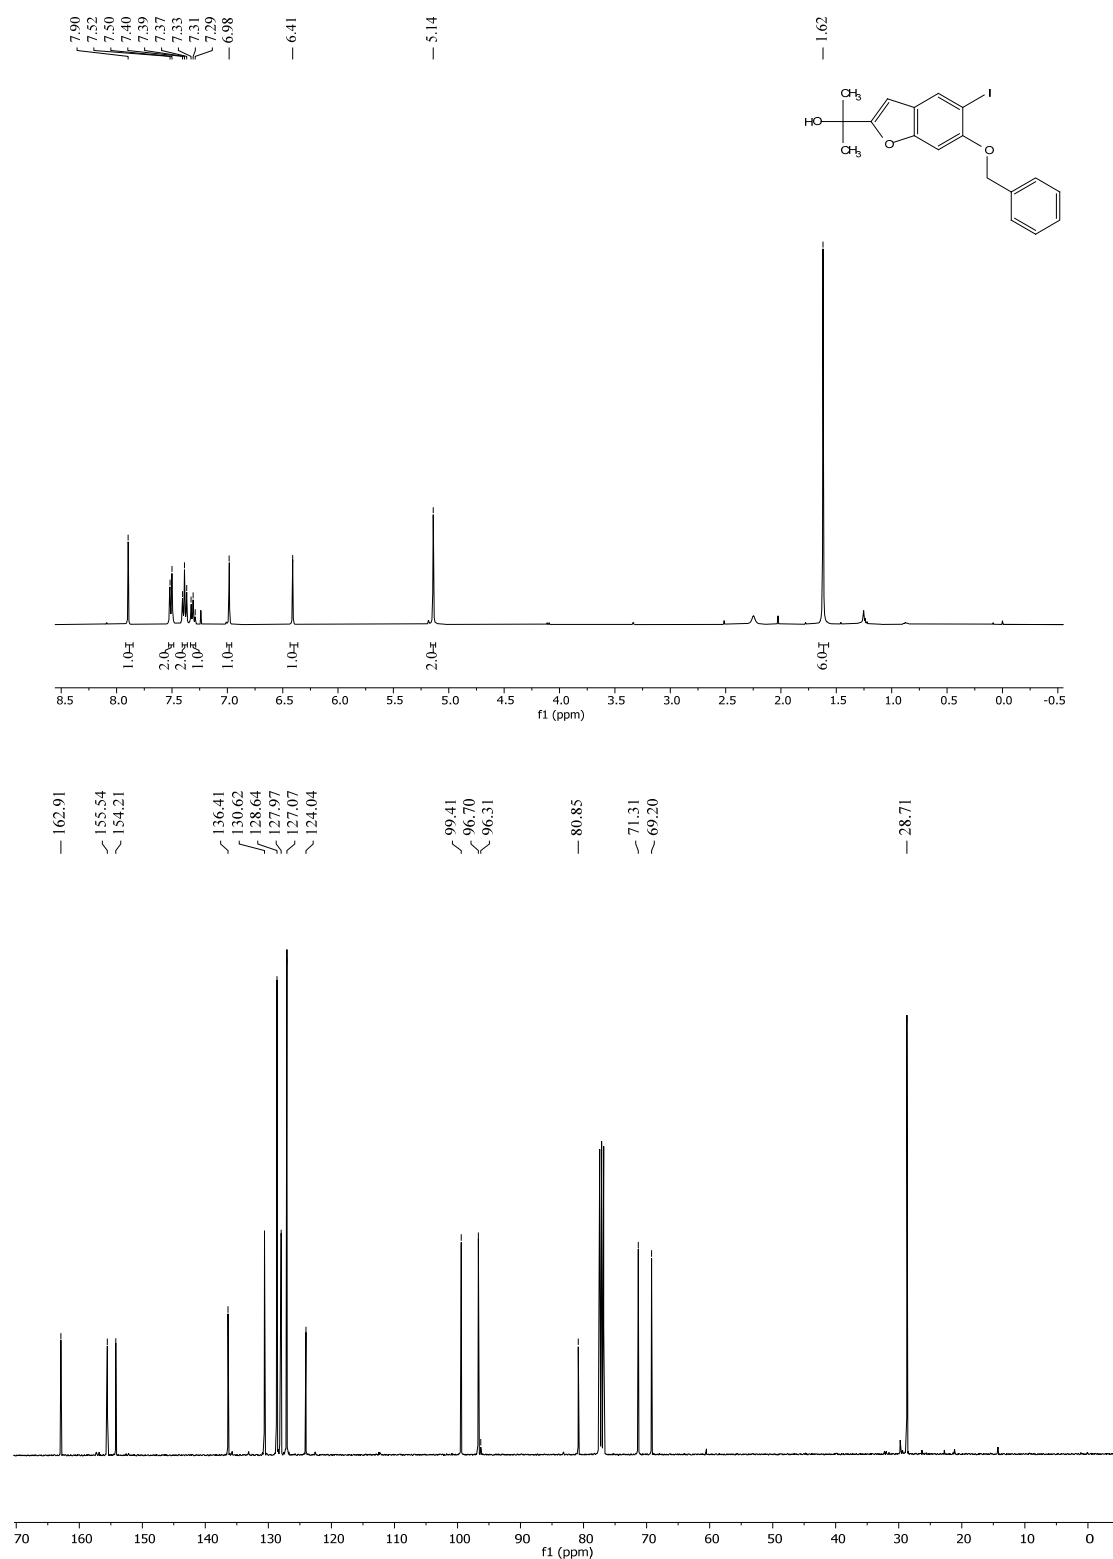

**Figure S16.** 400 MHz <sup>1</sup>H (top) and 101 MHz <sup>13</sup>C (bottom) NMR spectra of **28** in CDCl<sub>3</sub>.

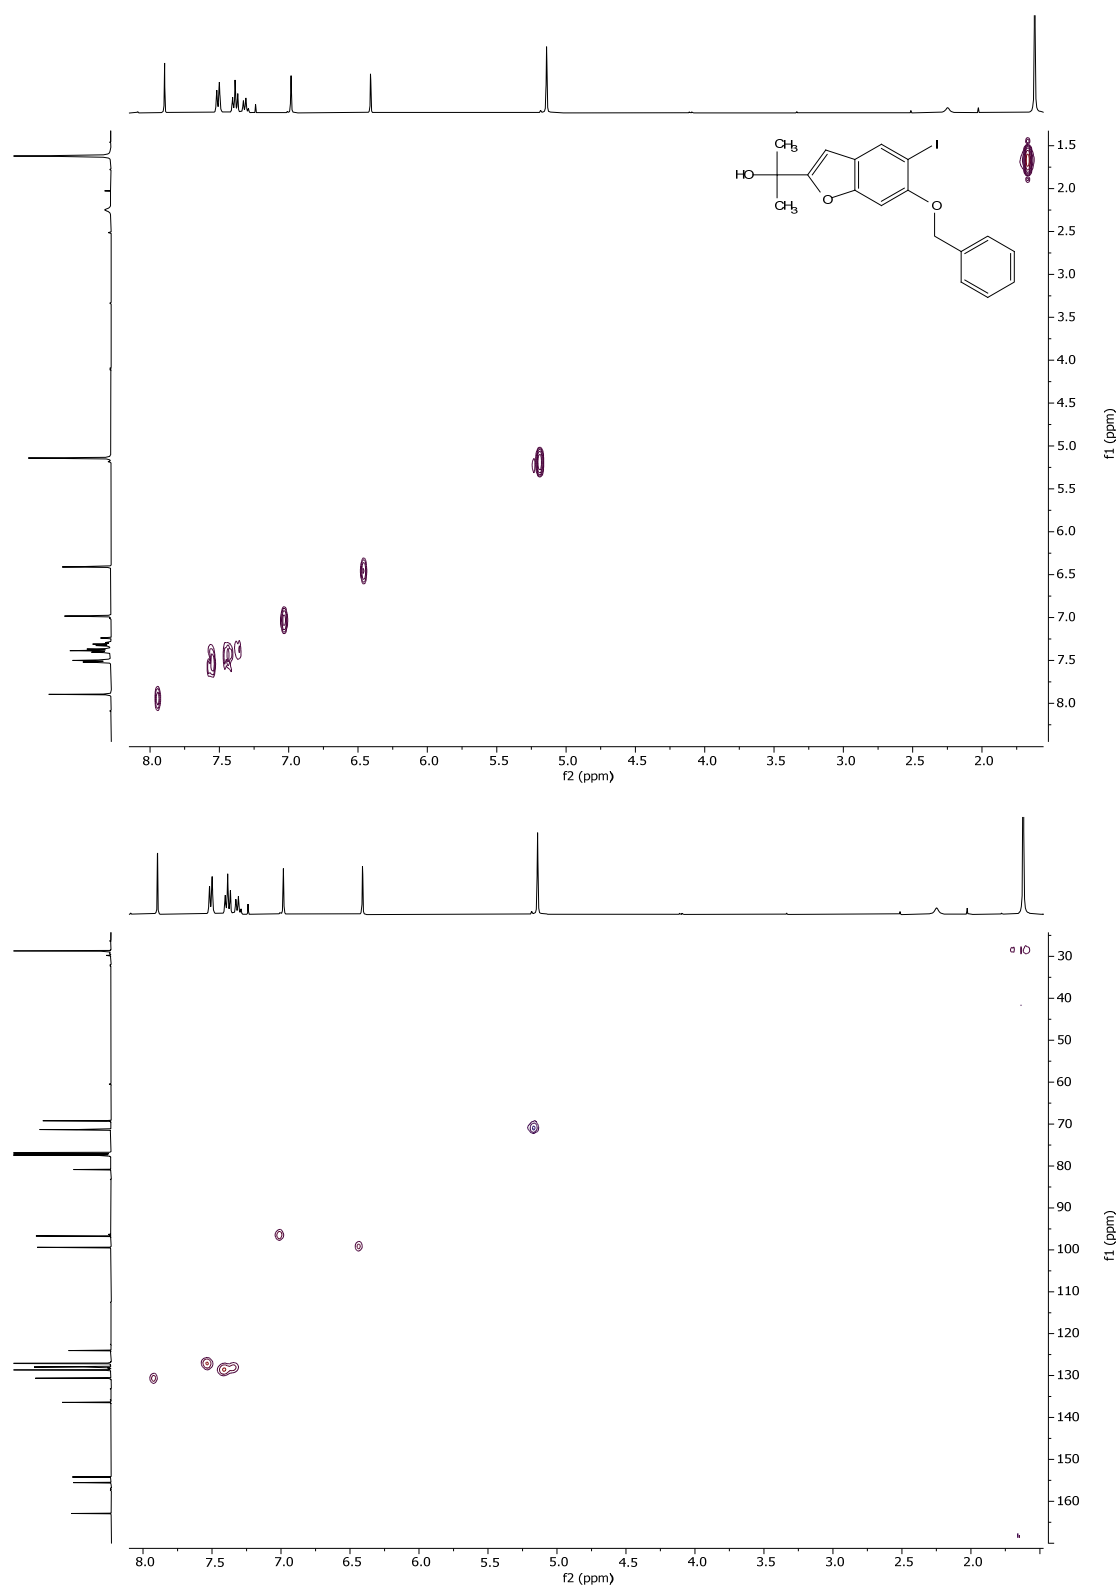

Figure S17. COSY (top) and HSQC (bottom) spectra of compound **28** in  $\text{CDCl}_3$ .

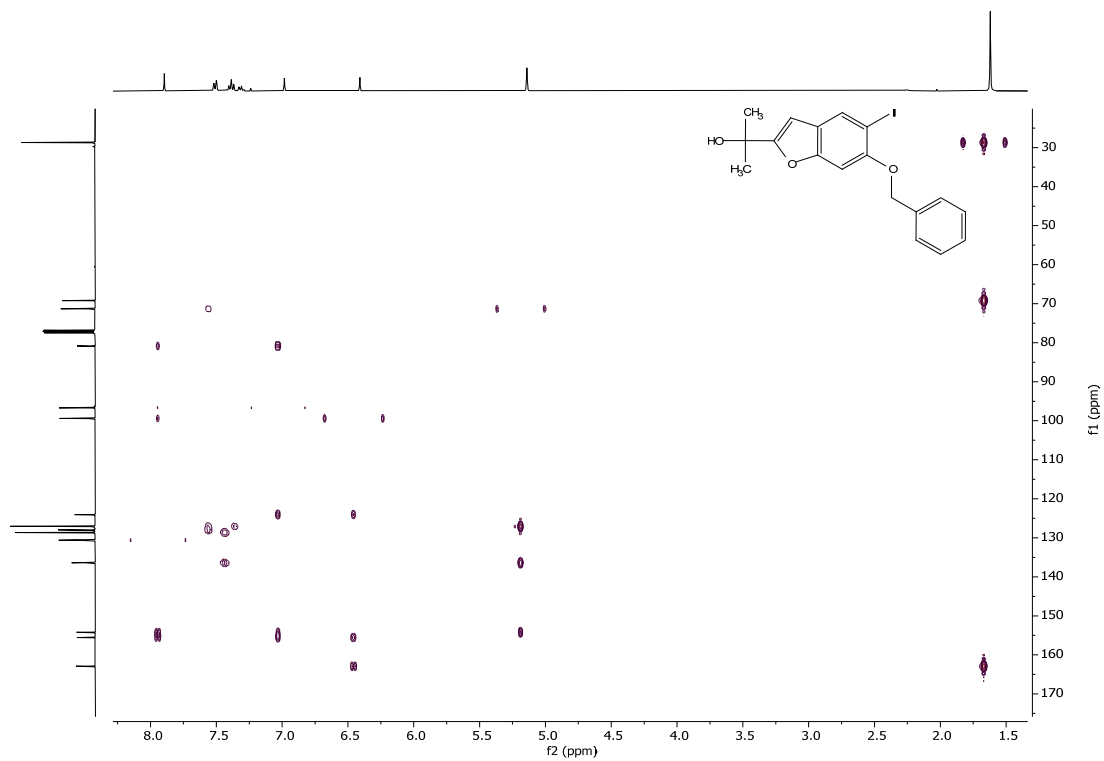

**Figure S18.** HMBC spectrum of compound **28** in  $\text{CDCl}_3$ .

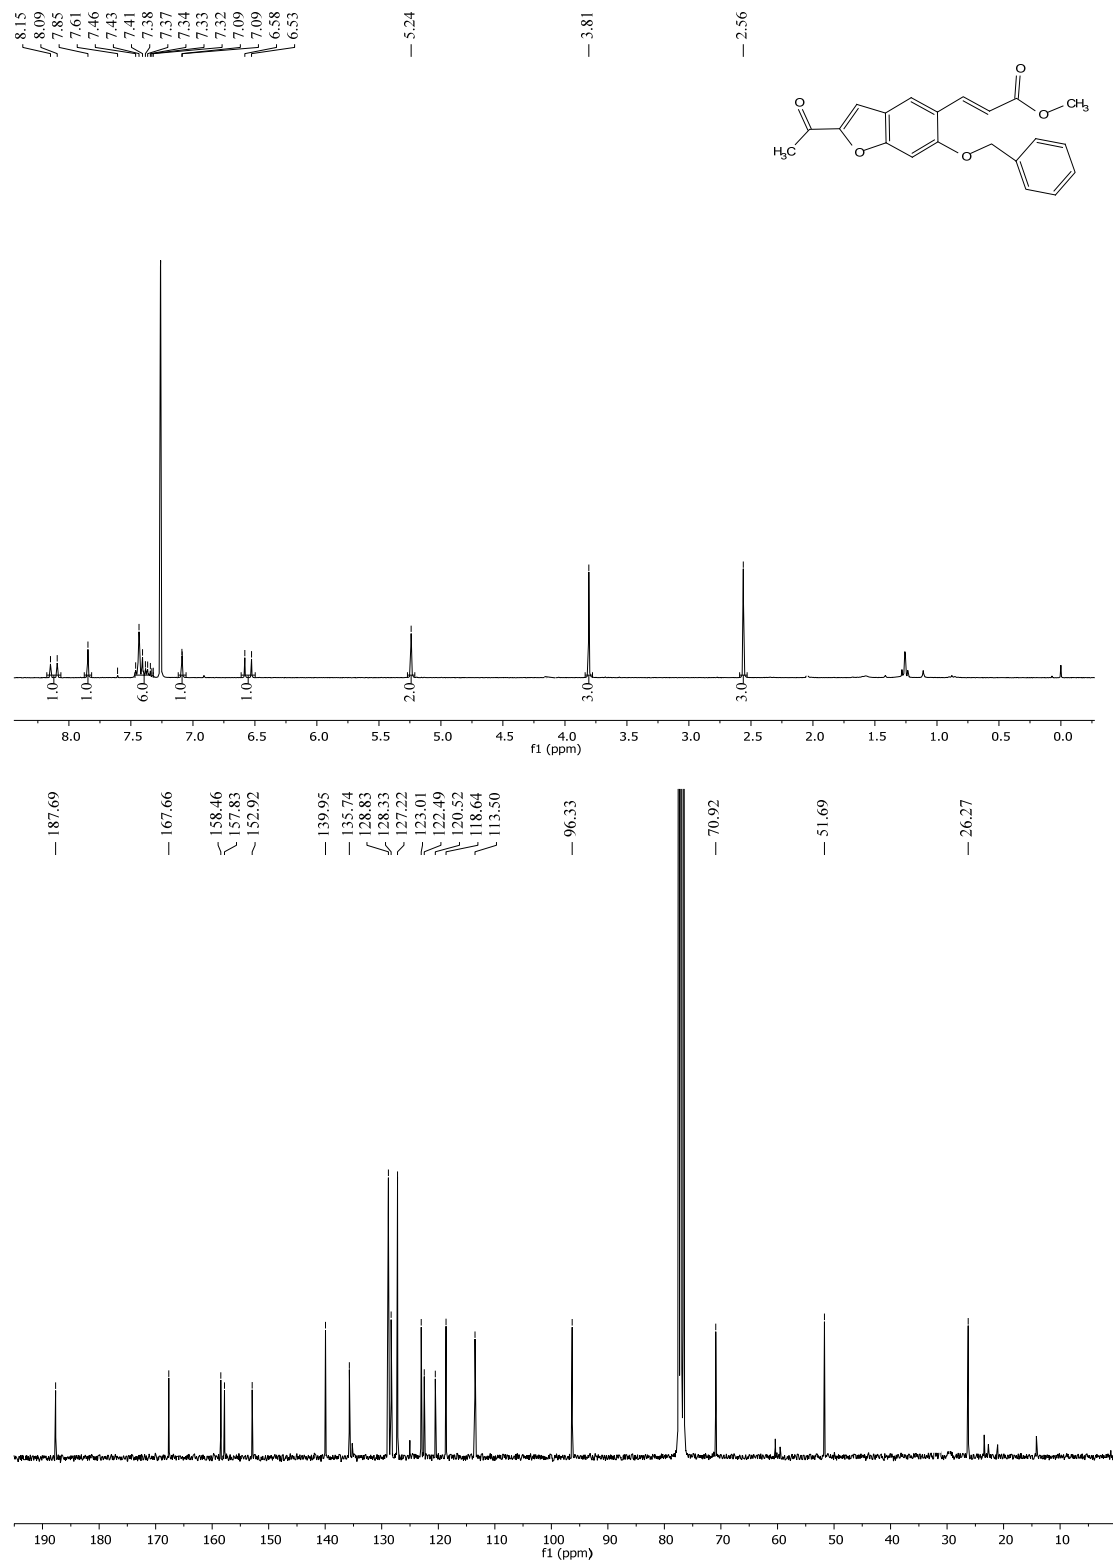

Figure S19. 400 MHz <sup>1</sup>H (top) and 101 MHz <sup>13</sup>C (bottom) NMR spectra of **20** in CDCl<sub>3</sub>.

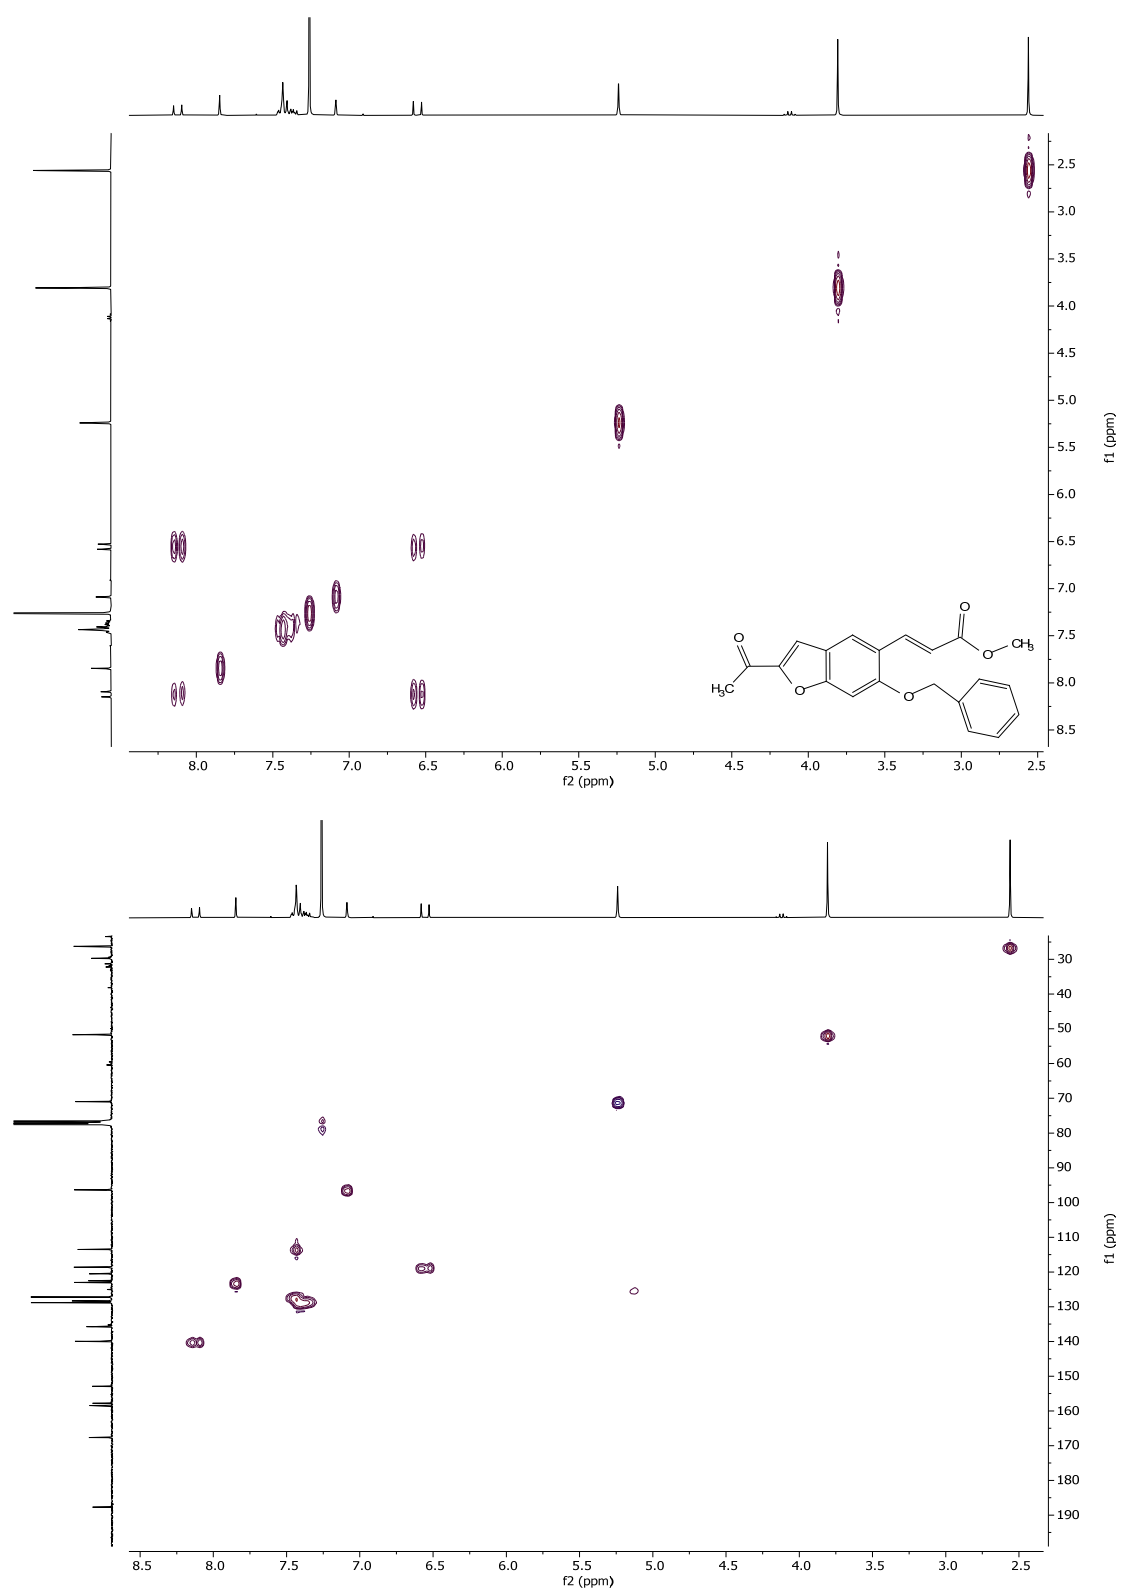

**Figure S20.** COSY (top) and HSQC (bottom) spectra of compound **20** in  $\text{CDCl}_3$ .

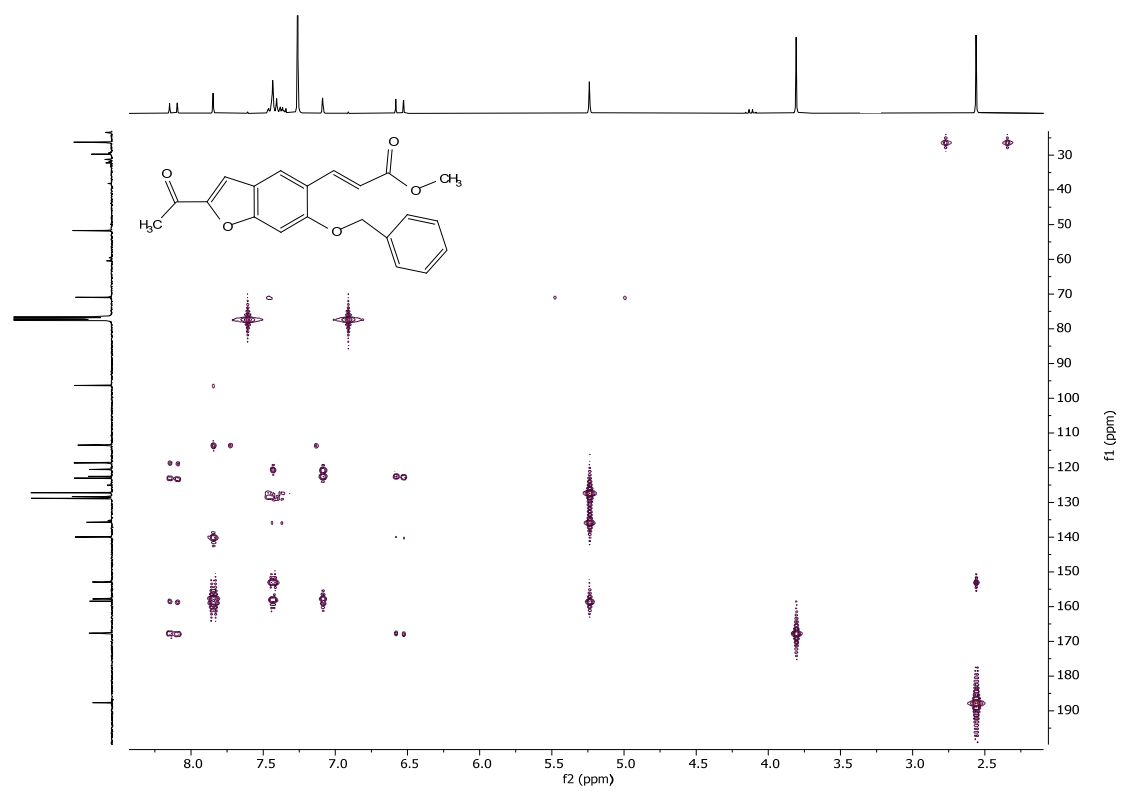

Figure S21. HMBC spectrum of compound **20** in CDCl<sub>3</sub>.

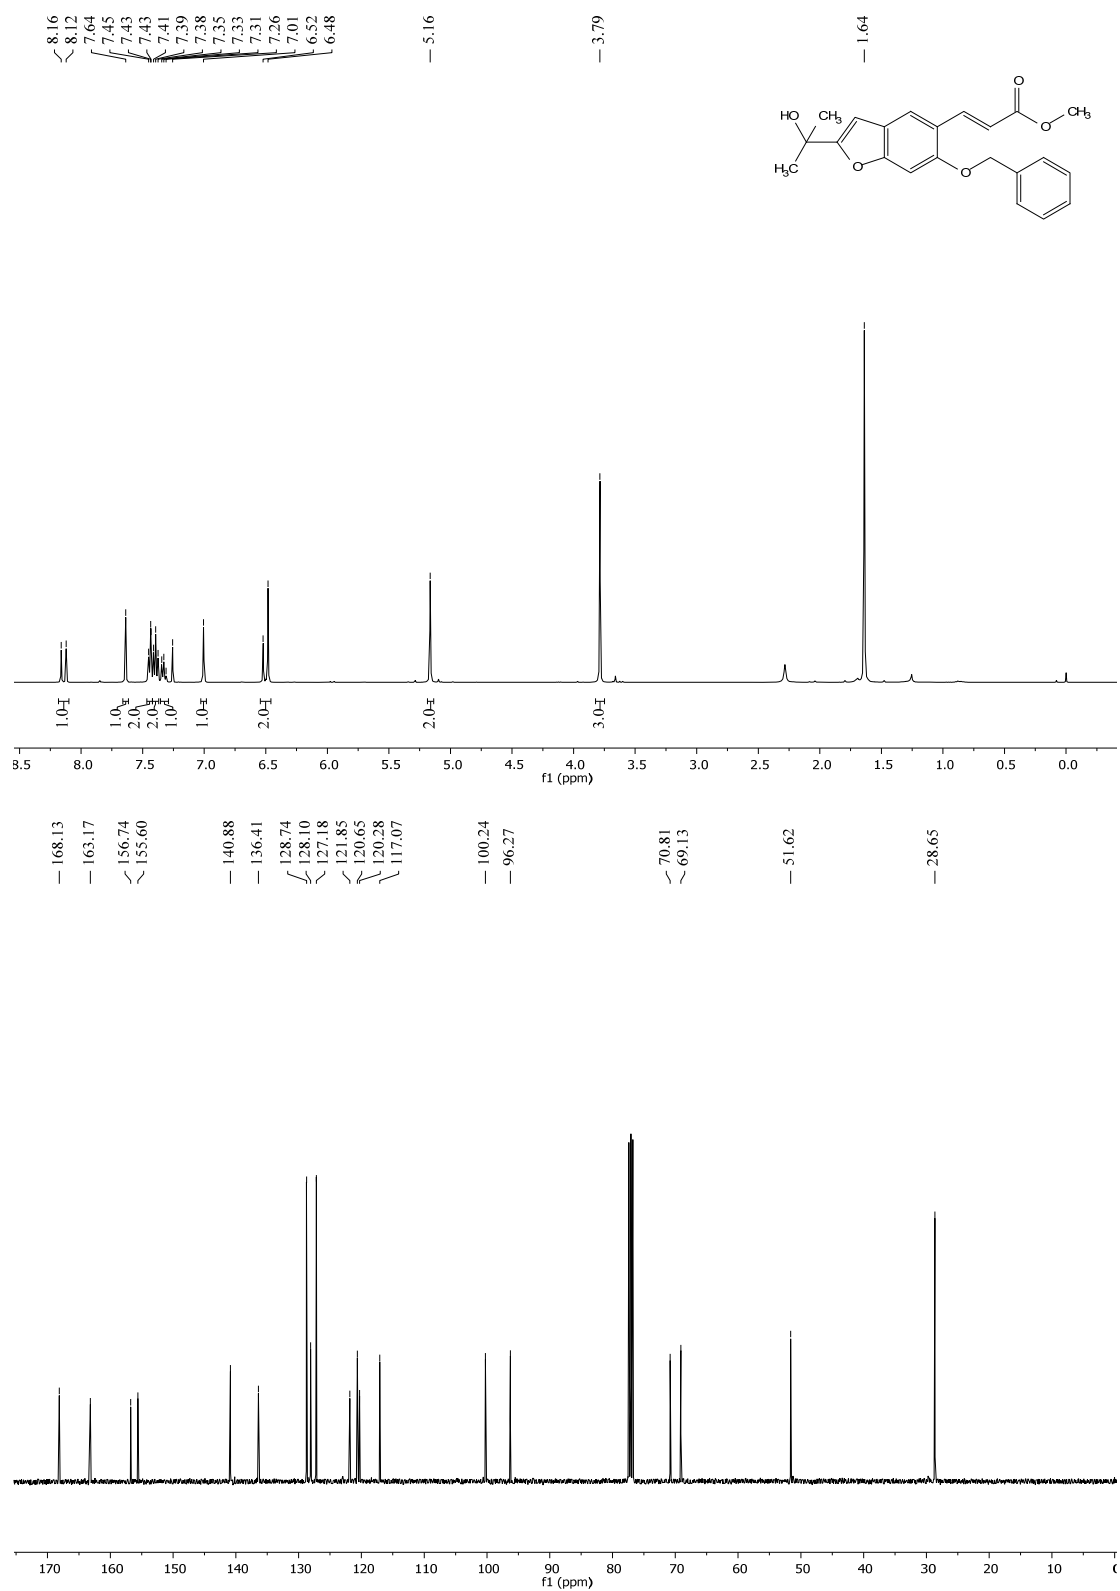

Figure S22. 400 MHz <sup>1</sup>H (top) and 101 MHz <sup>13</sup>C (bottom) NMR spectra of **21** in CDCl<sub>3</sub>.

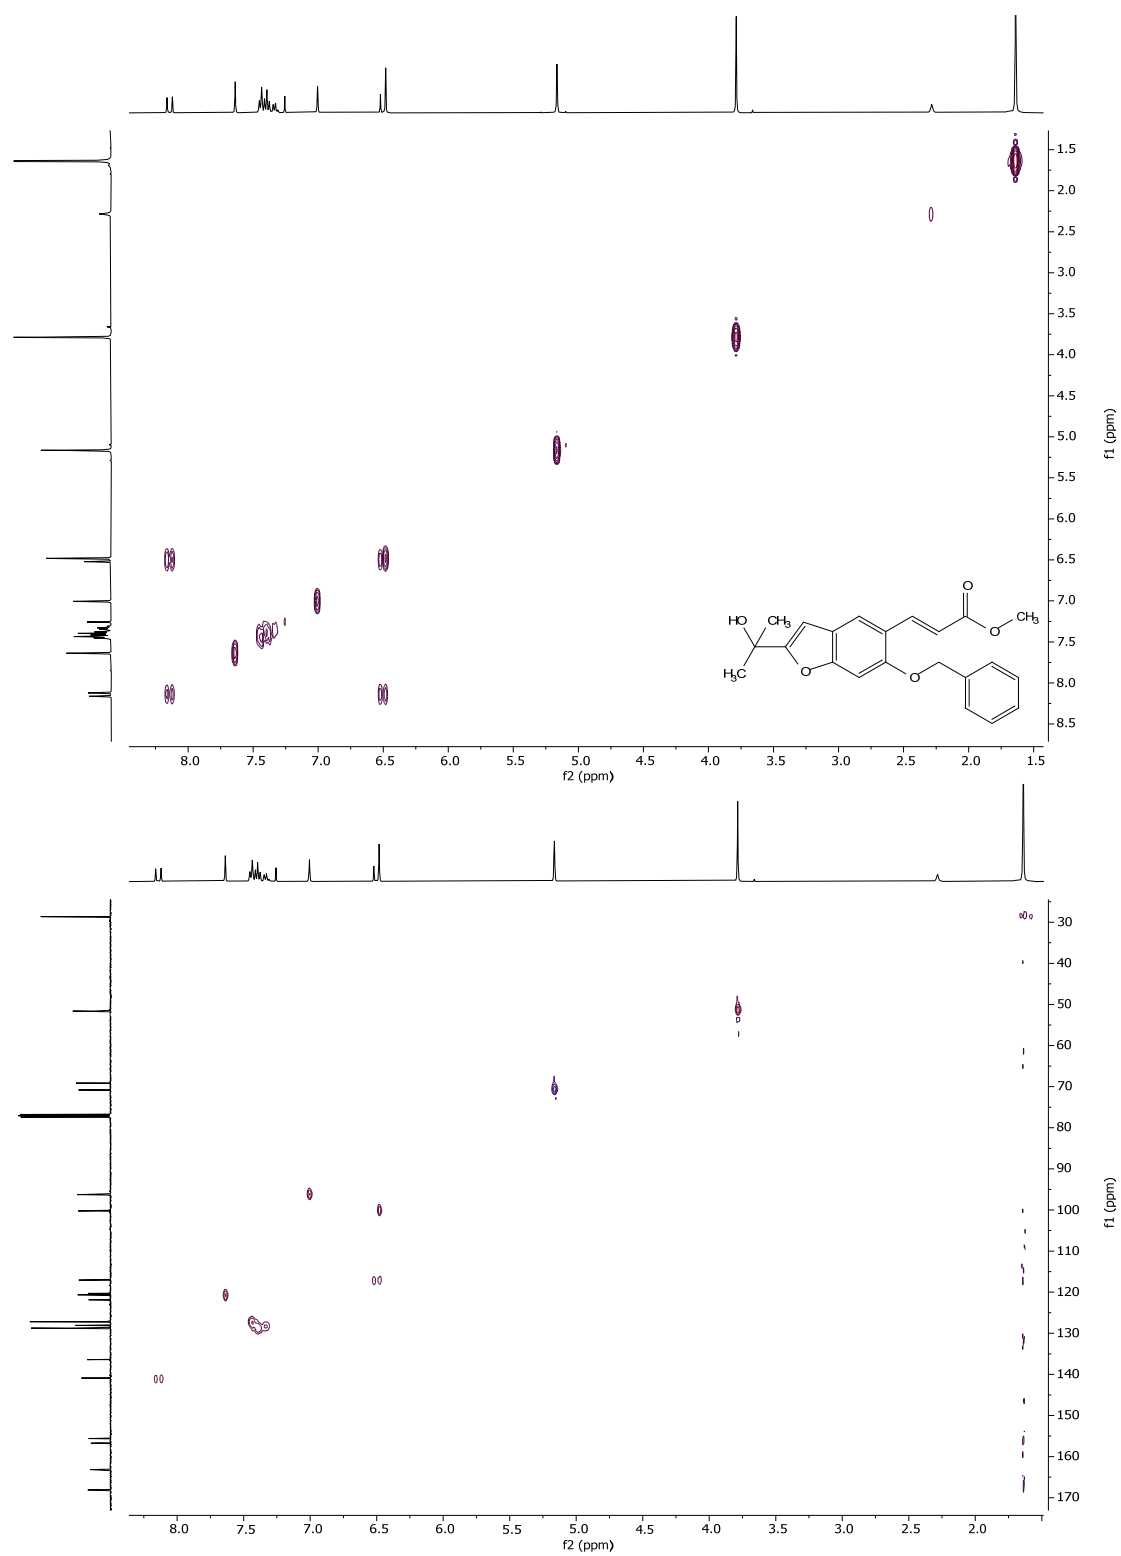

**Figure S23.** COSY (top) and HSQC (bottom) spectra of compound **21** in  $\text{CDCl}_3$ .

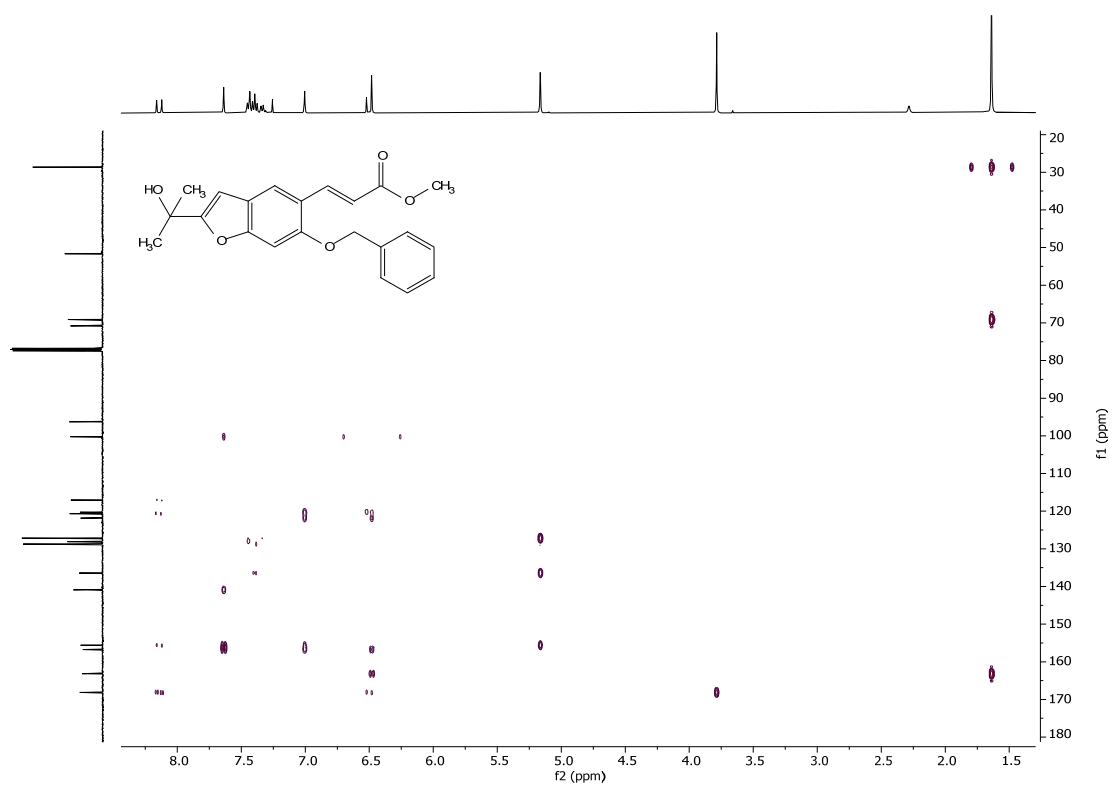

Figure S24. HMBC spectrum of compound 21 in  $\text{CDCl}_3$ .

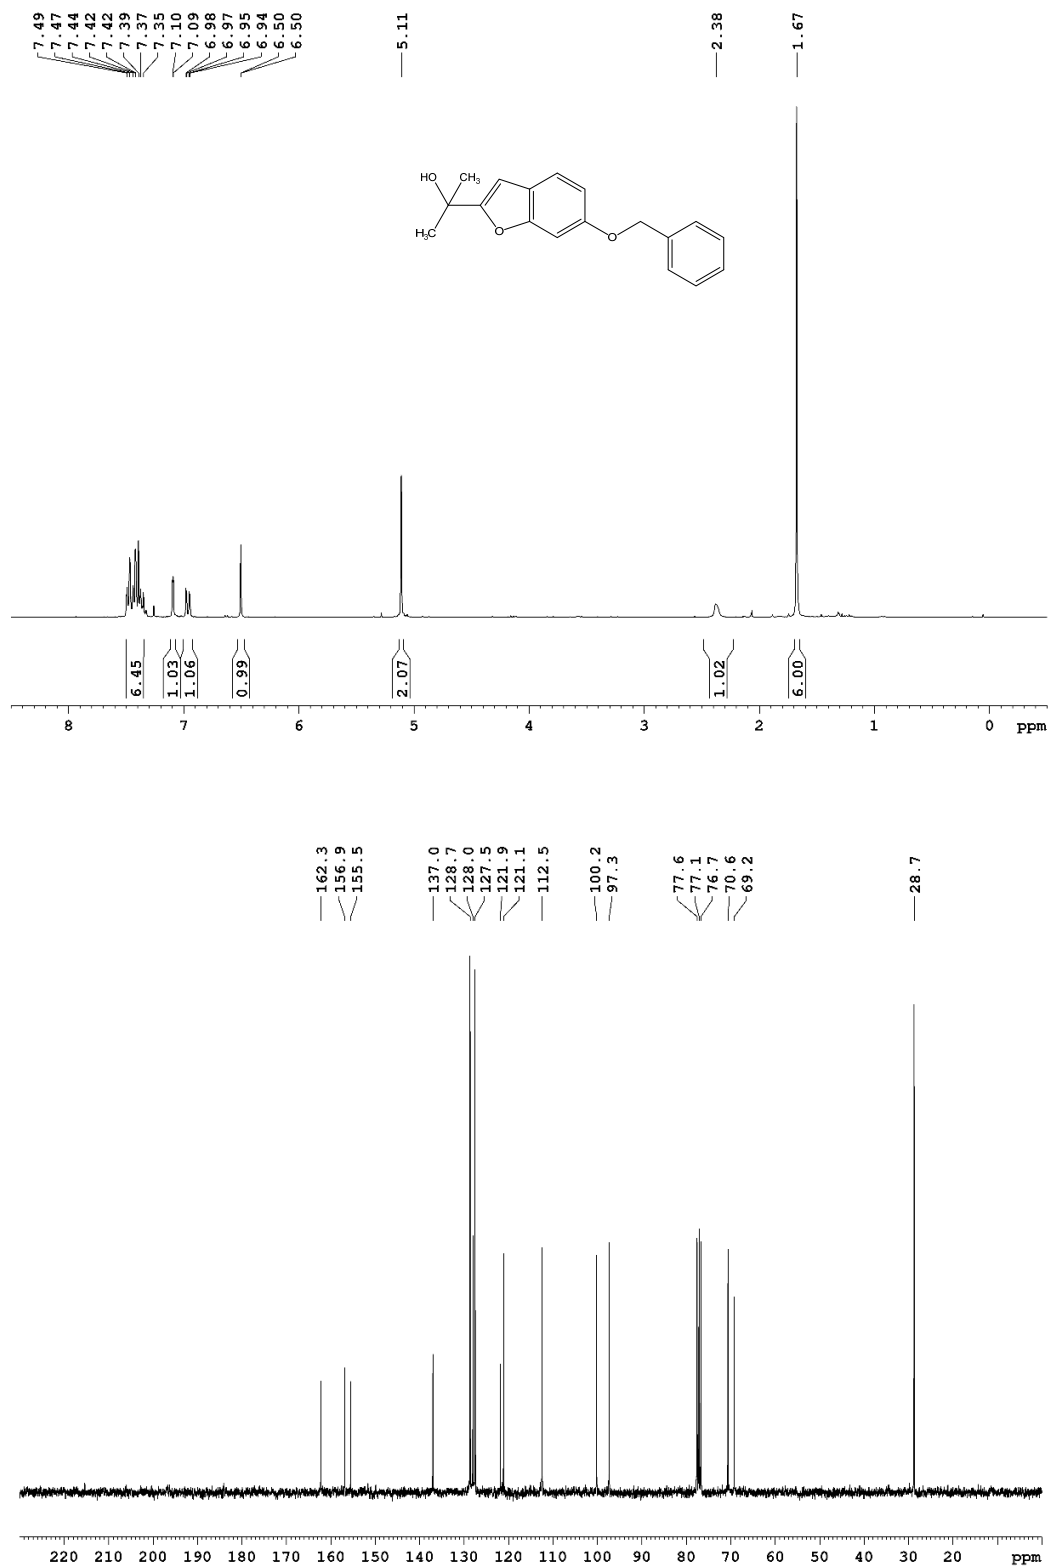

Figure S25. 300 MHz <sup>1</sup>H (top) and 75 MHz <sup>13</sup>C (bottom) NMR spectra of **23** in CDCl<sub>3</sub>.

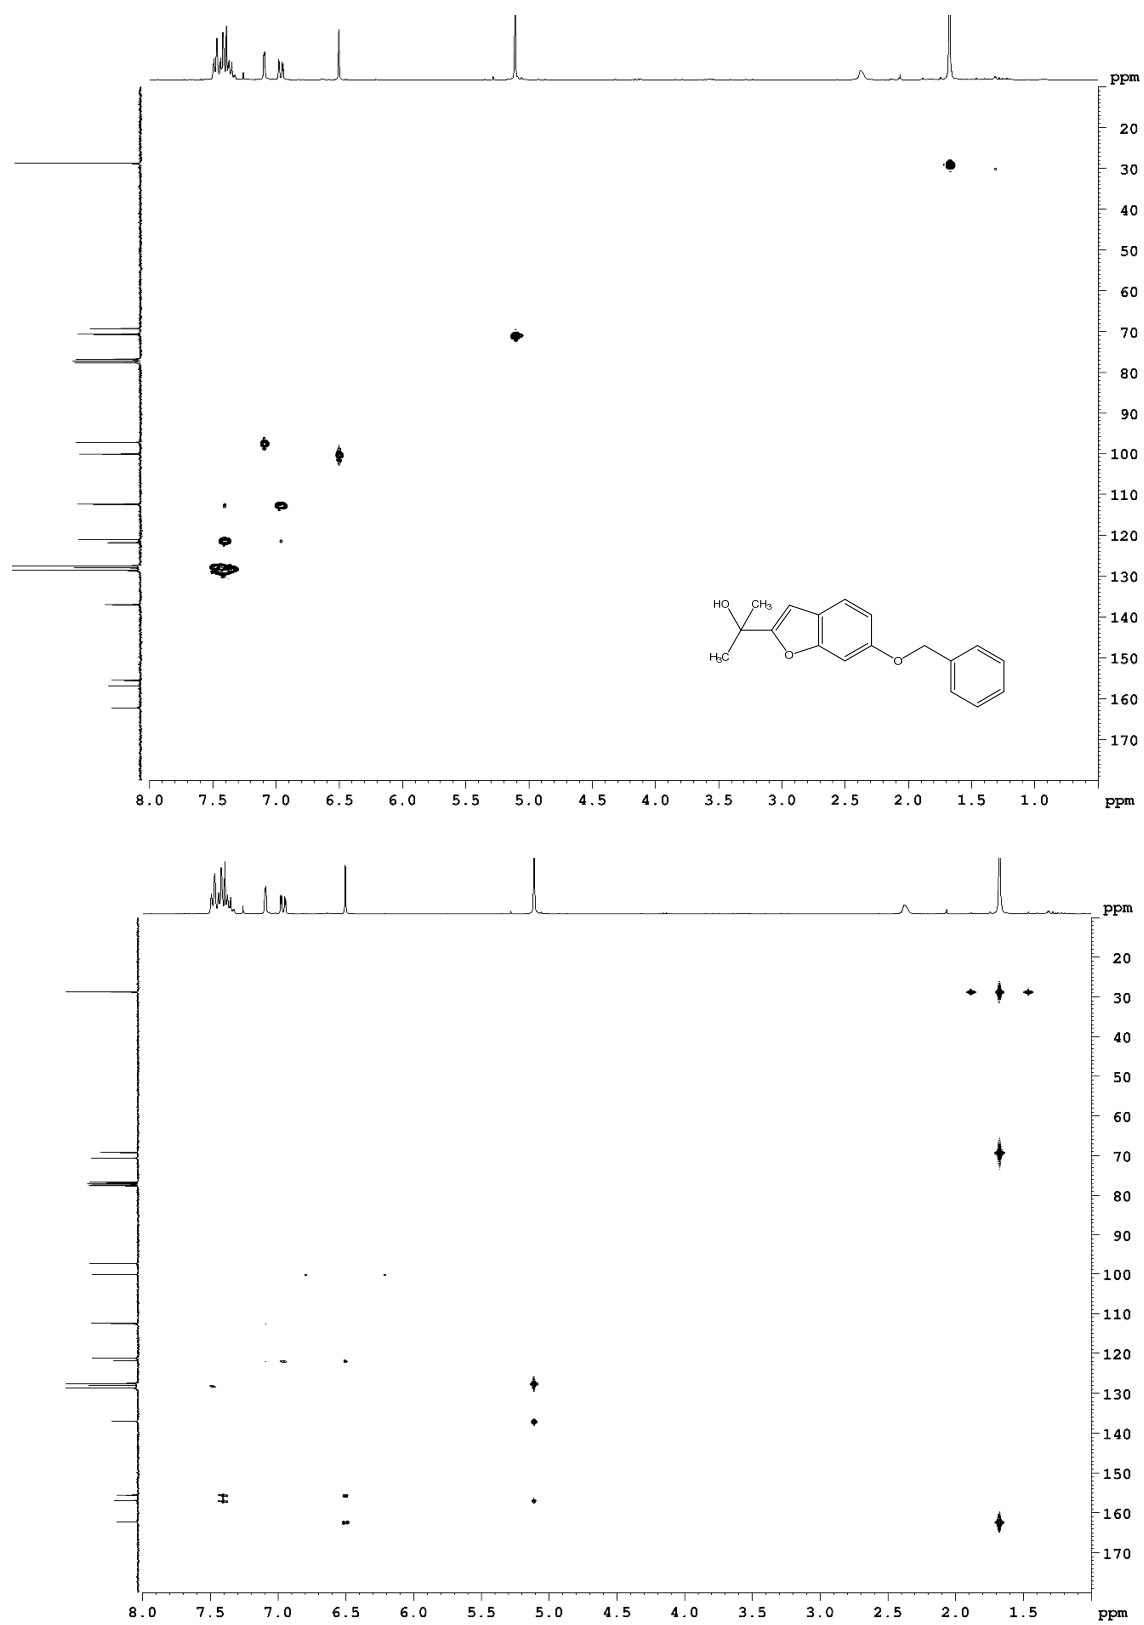

Figure S26. HSQC (top) and HMBC (bottom) spectra of compound **23** in  $\text{CDCl}_3$ .

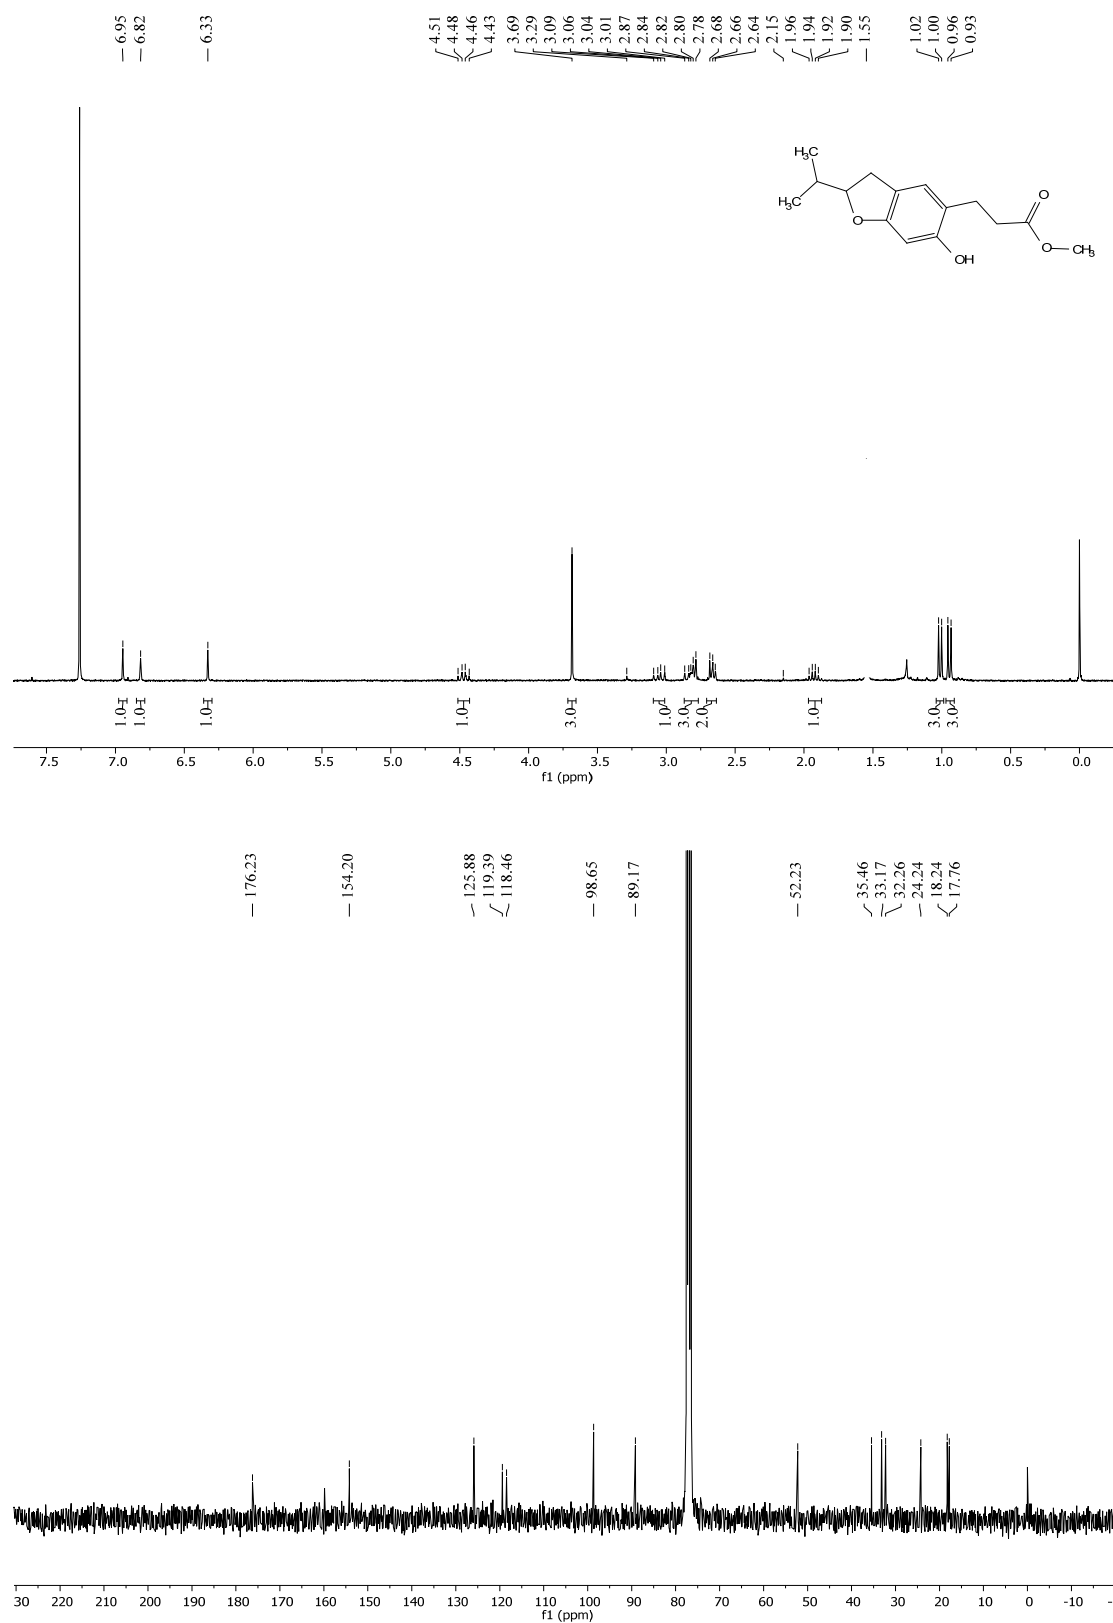

Figure S27. 300 MHz <sup>1</sup>H (top) and 75 MHz <sup>13</sup>C (bottom) NMR spectra of **29** in CDCl<sub>3</sub>.

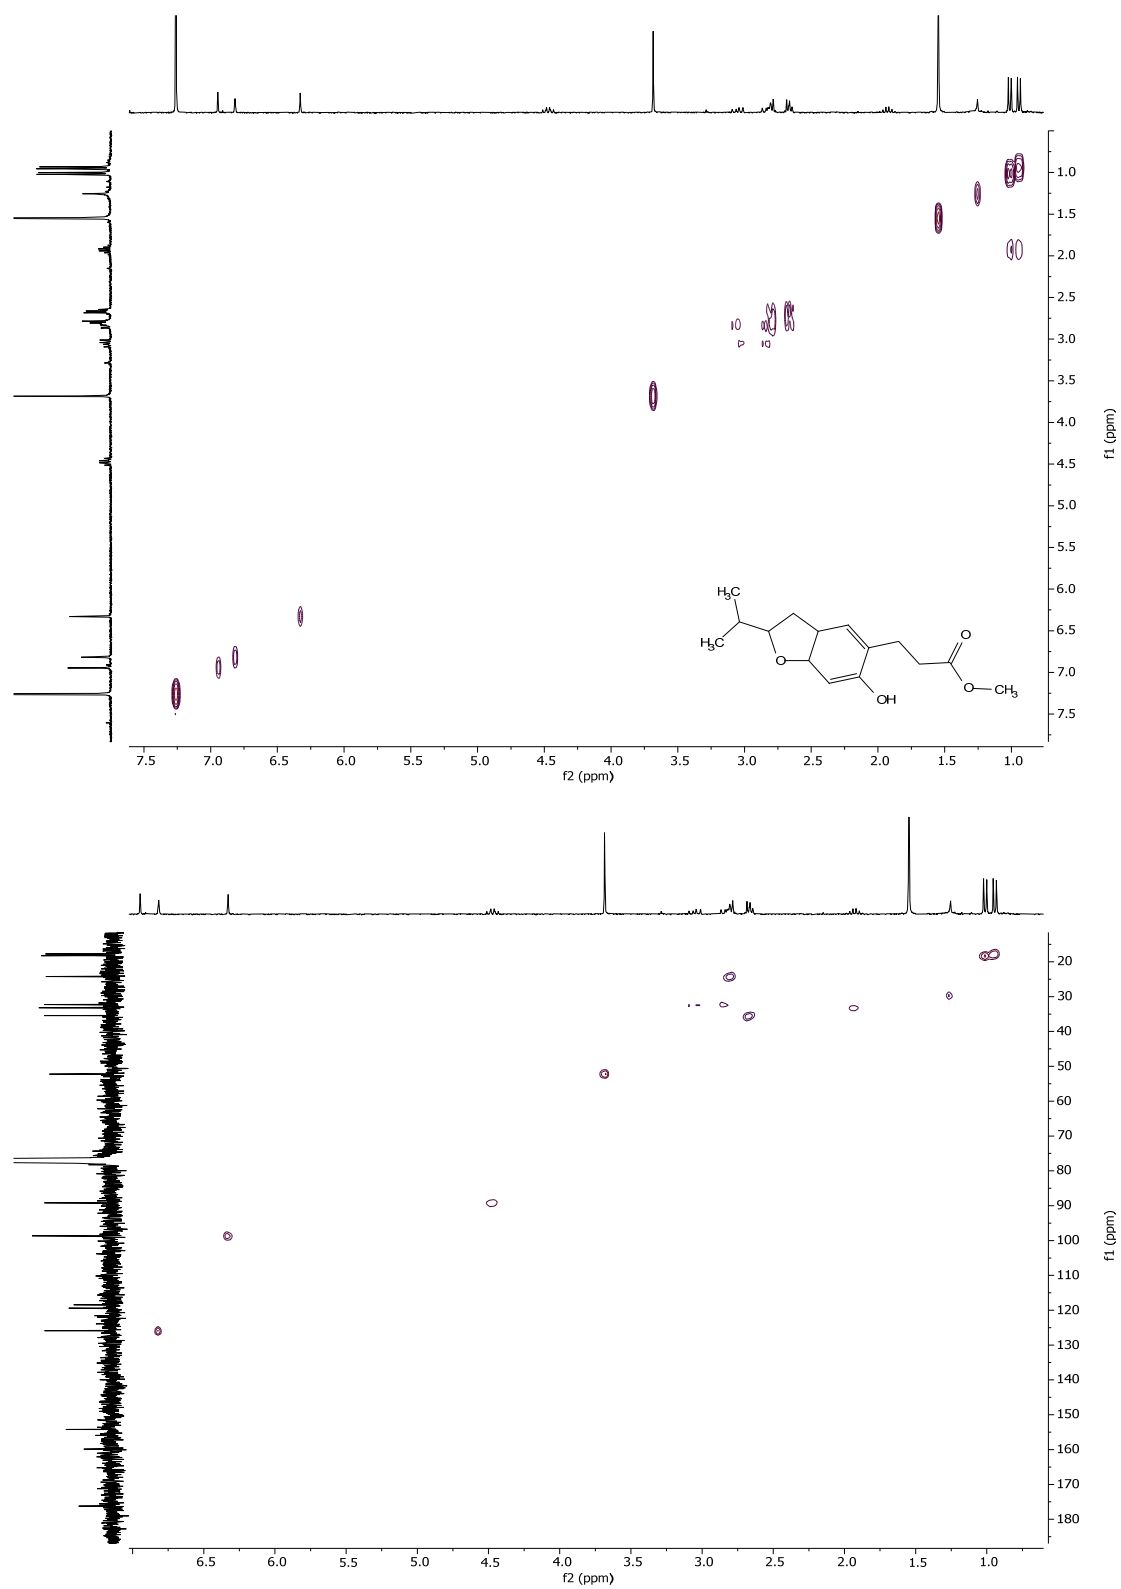

Figure S28. COSY (top) and HSQC (bottom) spectra of compound **29** in  $\text{CDCl}_3$ .

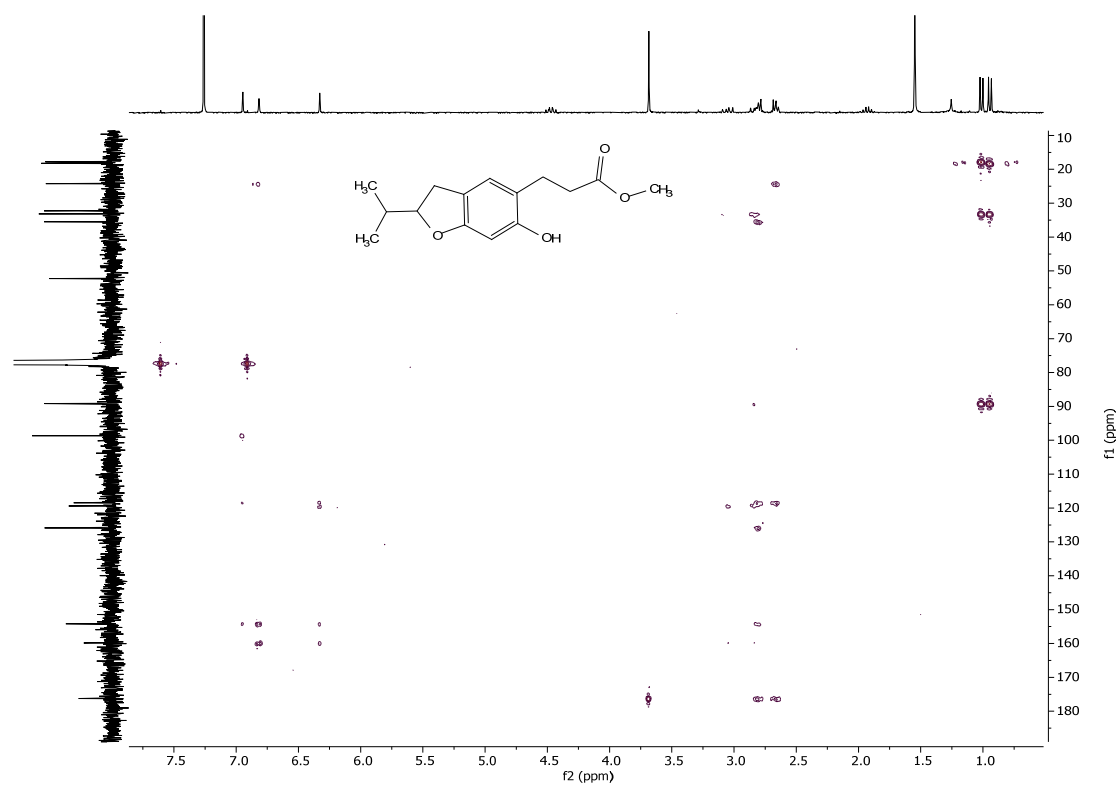

Figure S29. HMBC spectrum of compound **29** in  $\text{CDCl}_3$ .

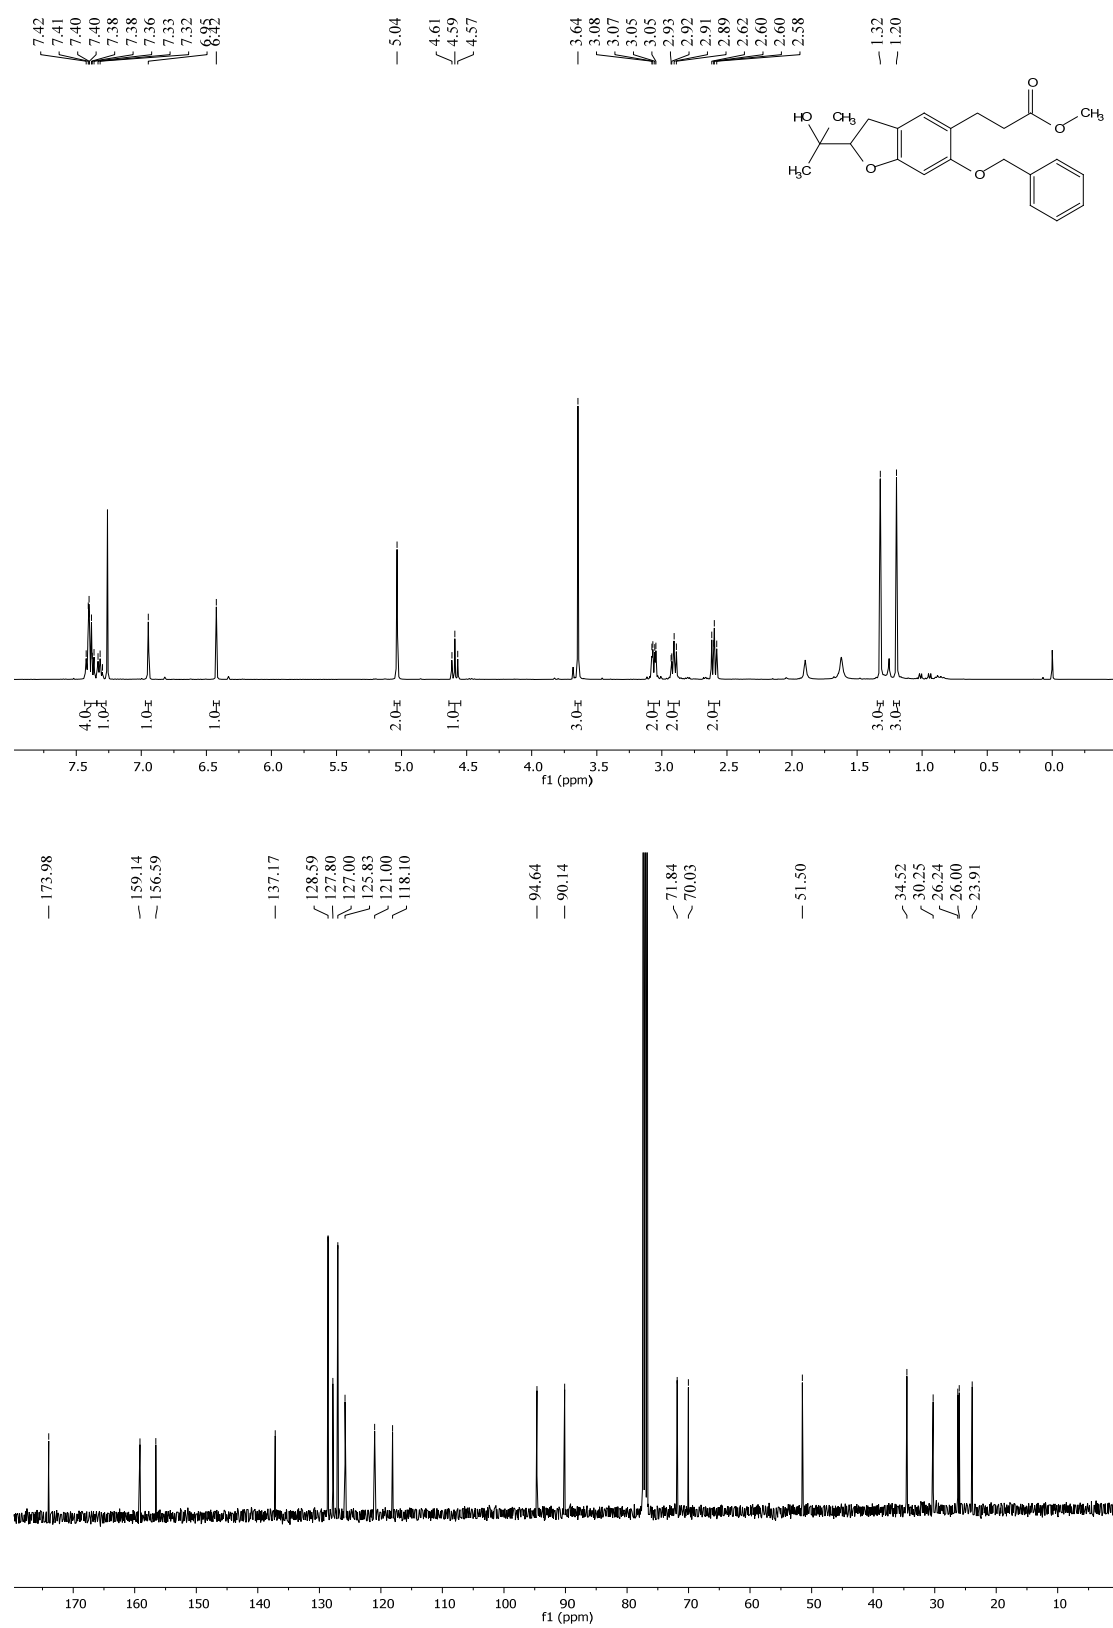

Figure S30. 400 MHz <sup>1</sup>H (top) and 101 MHz <sup>13</sup>C (bottom) NMR spectra of **30** in CDCl<sub>3</sub>.

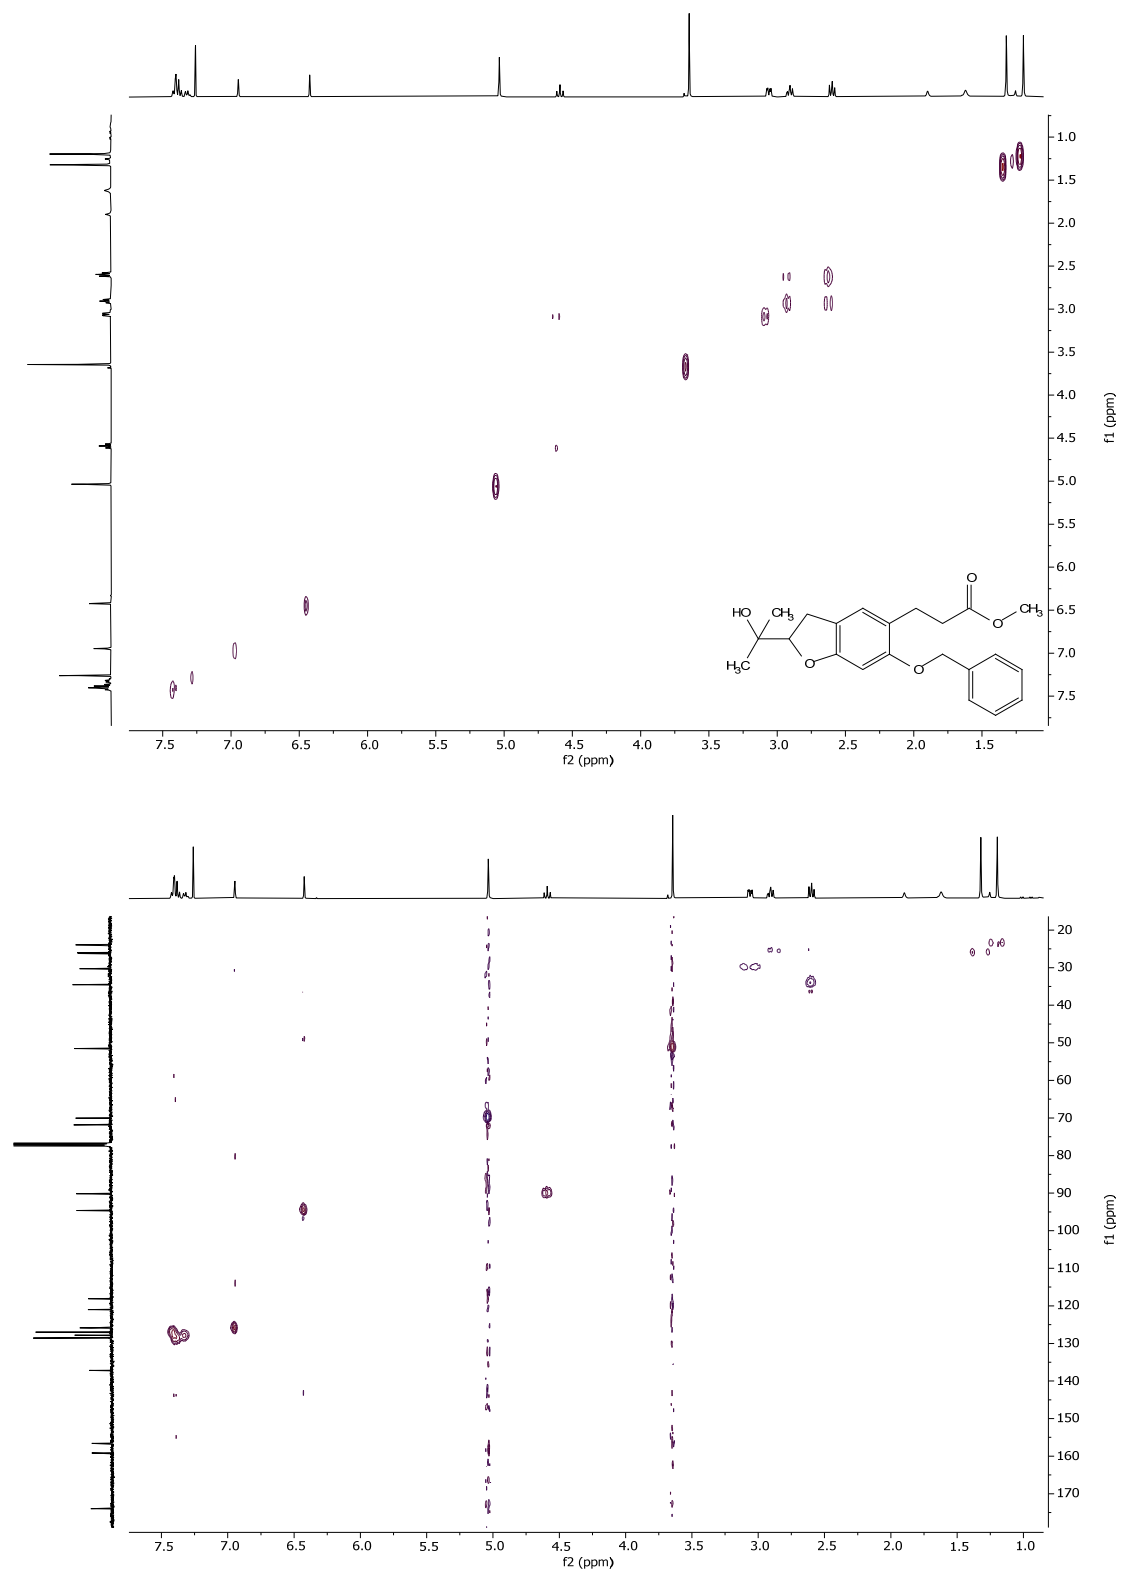

Figure S31. COSY (top) and HSQC (bottom) spectra of compound **30** in  $\text{CDCl}_3$ .

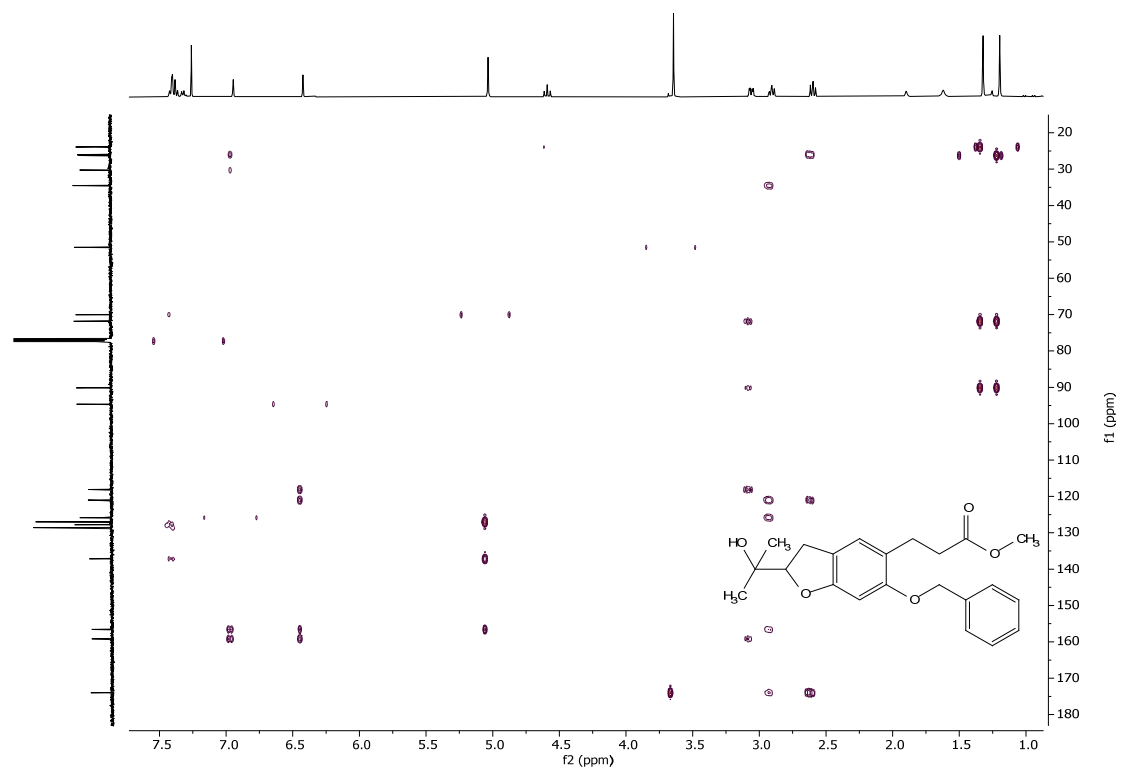

Figure S32. HMBC spectrum of compound **30** in  $\text{CDCl}_3$ .

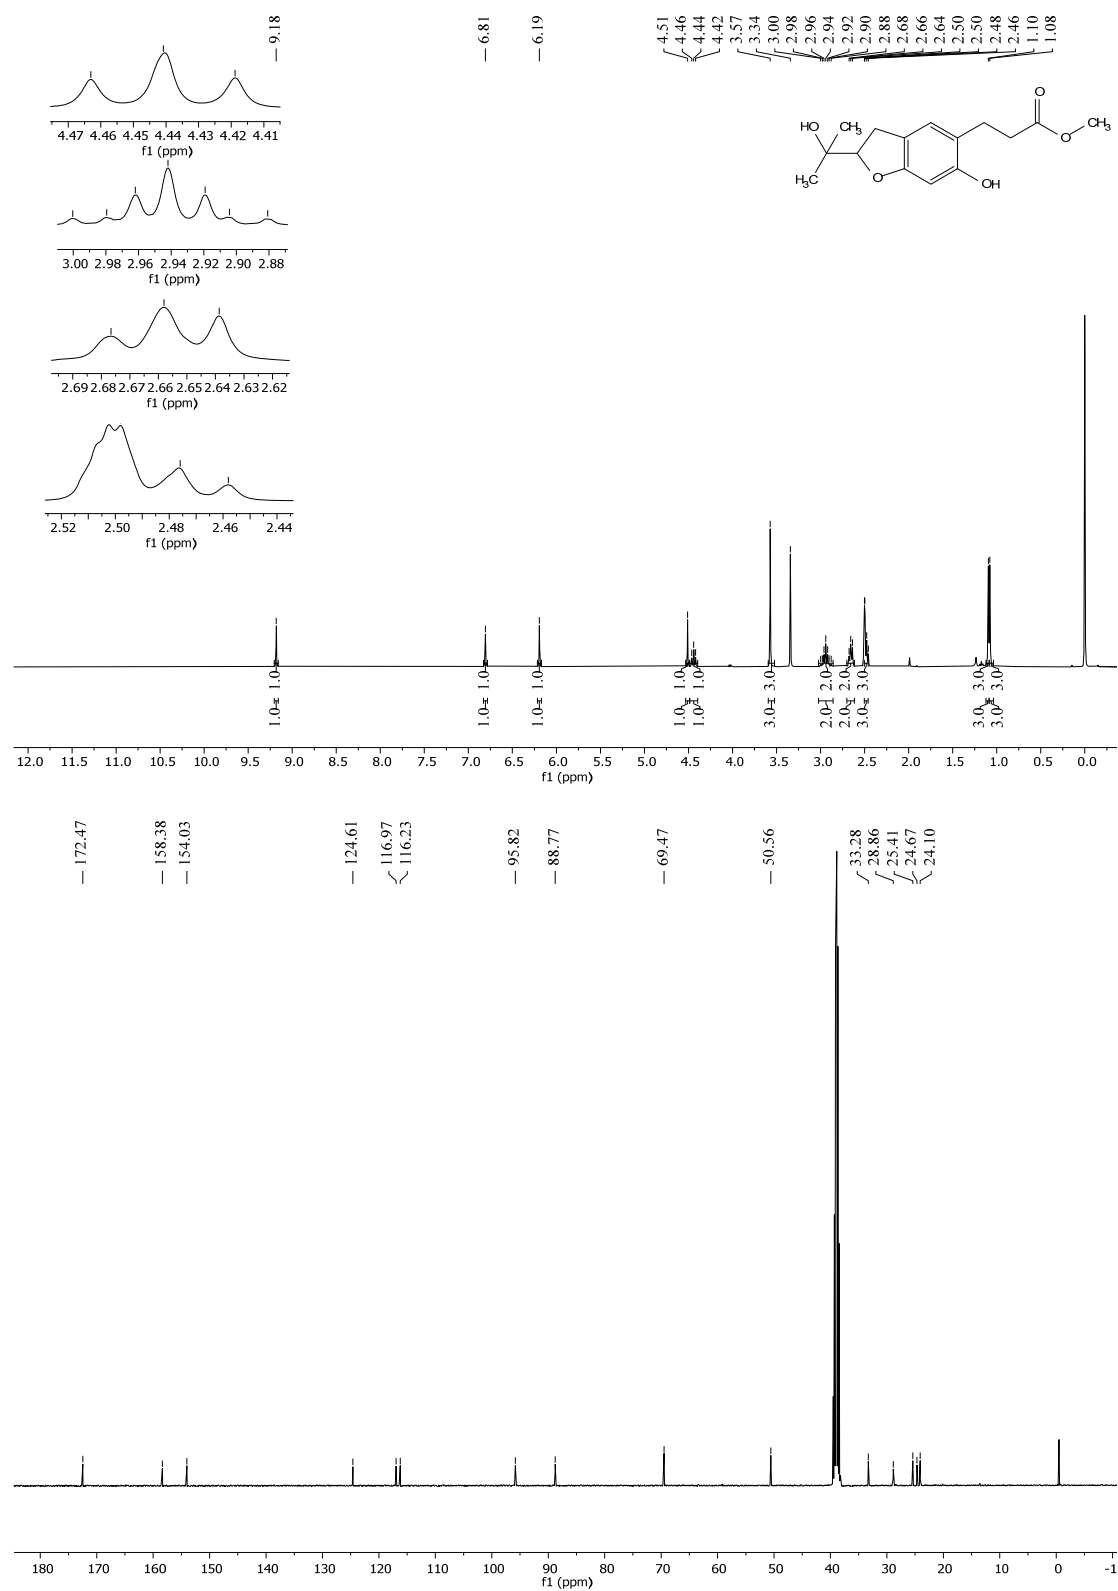

Figure S33. 400 MHz <sup>1</sup>H (top) and 101 MHz <sup>13</sup>C (bottom) NMR spectra of **1** in CDCl<sub>3</sub>.

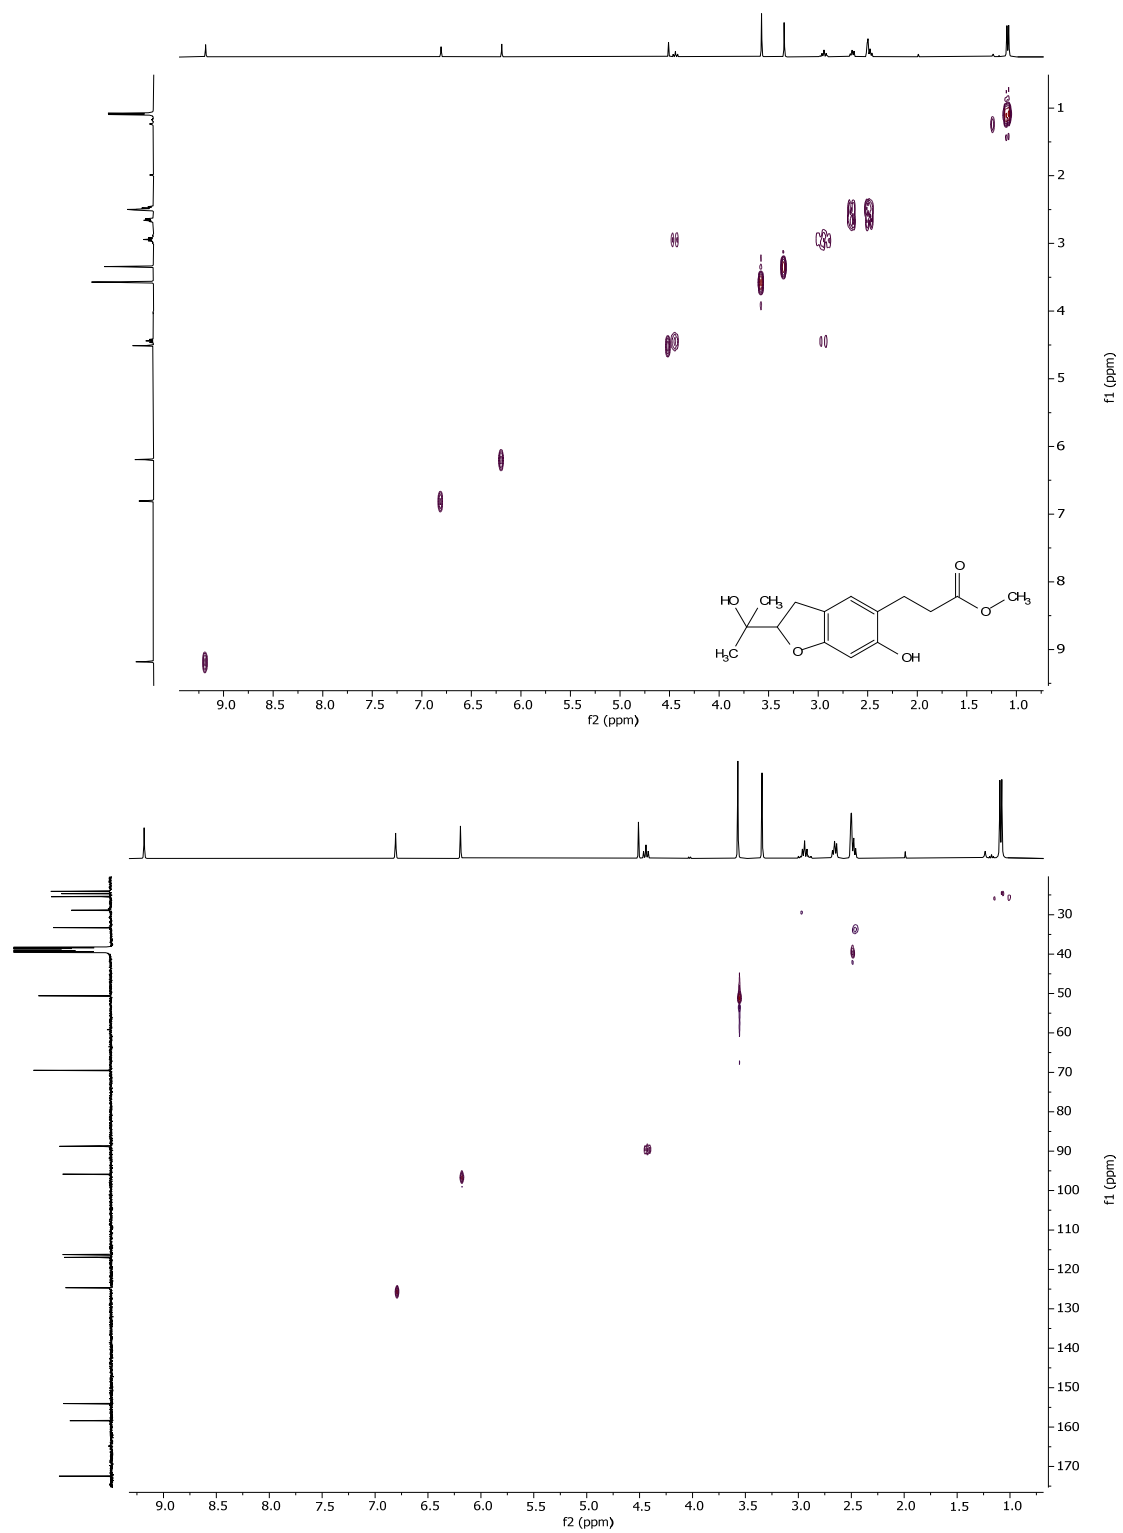

Figure S34. COSY (top) and HSQC (bottom) spectra of compound 1 in CDCl<sub>3</sub>.

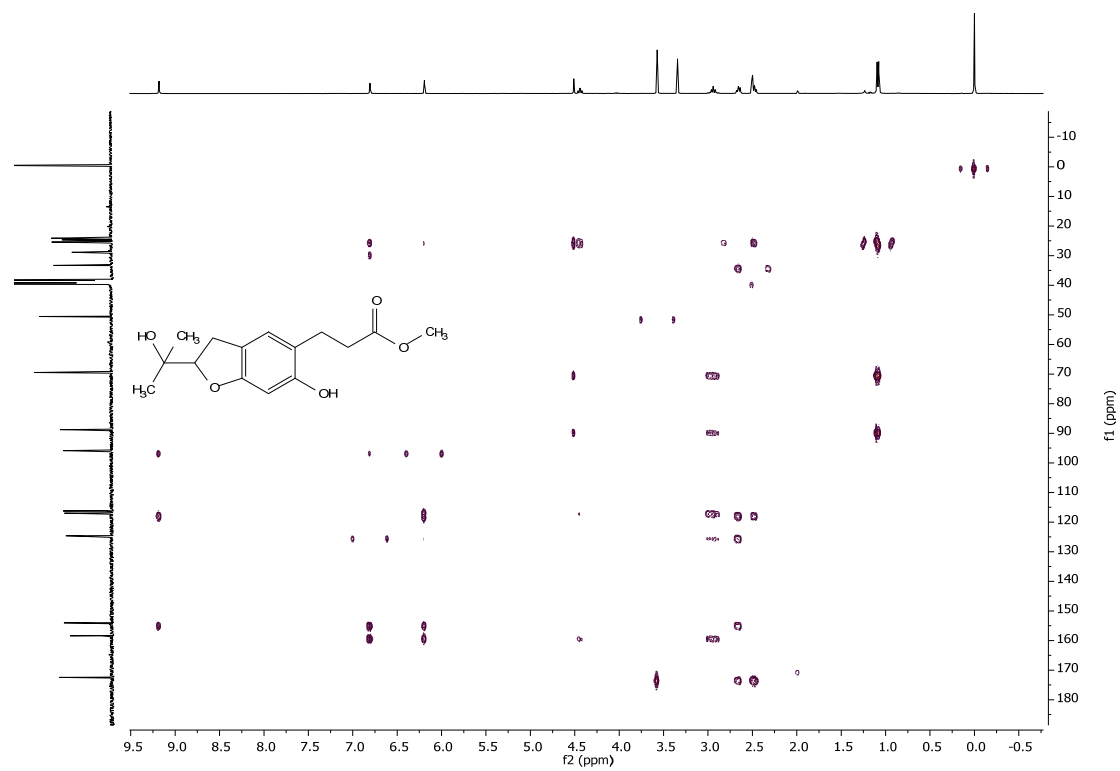

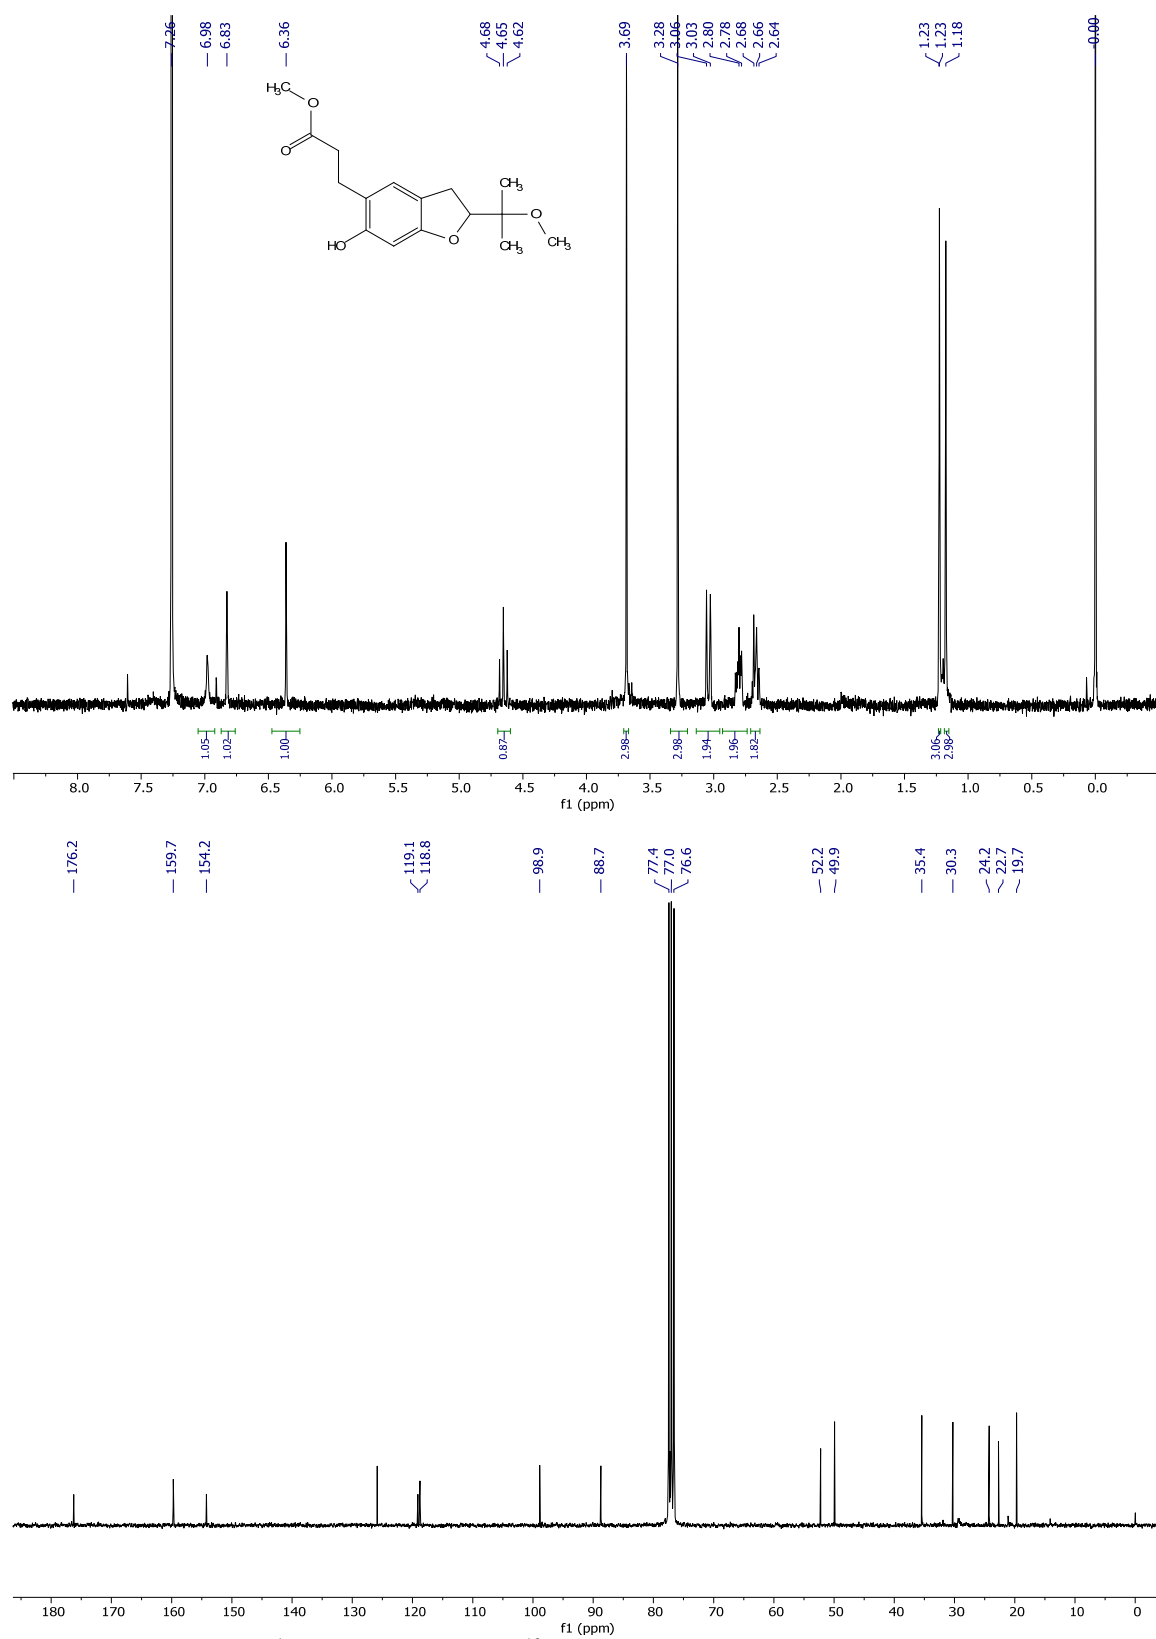

Figure S36. 300 MHz <sup>1</sup>H (top) and 75 MHz <sup>13</sup>C (bottom) NMR spectra of **31** in CDCl<sub>3</sub>.

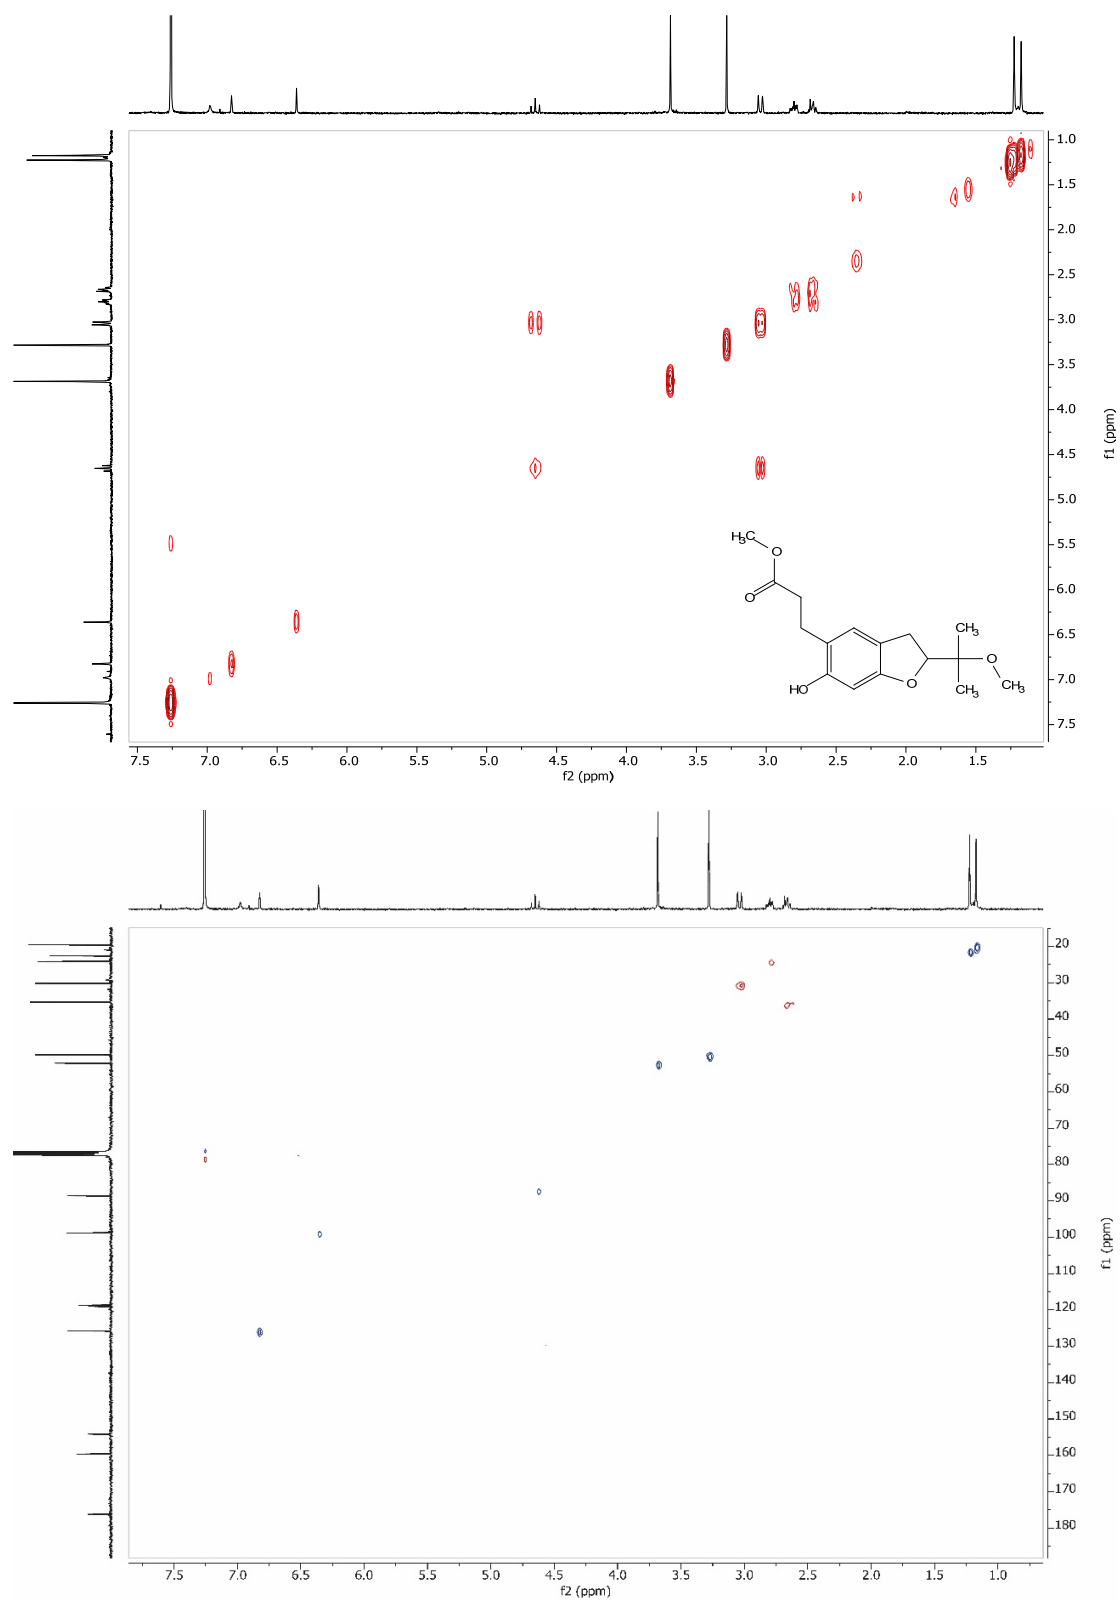

Figure S37. COSY (top) and HSQC (bottom) spectra of compound **31** in  $\text{CDCl}_3$ .

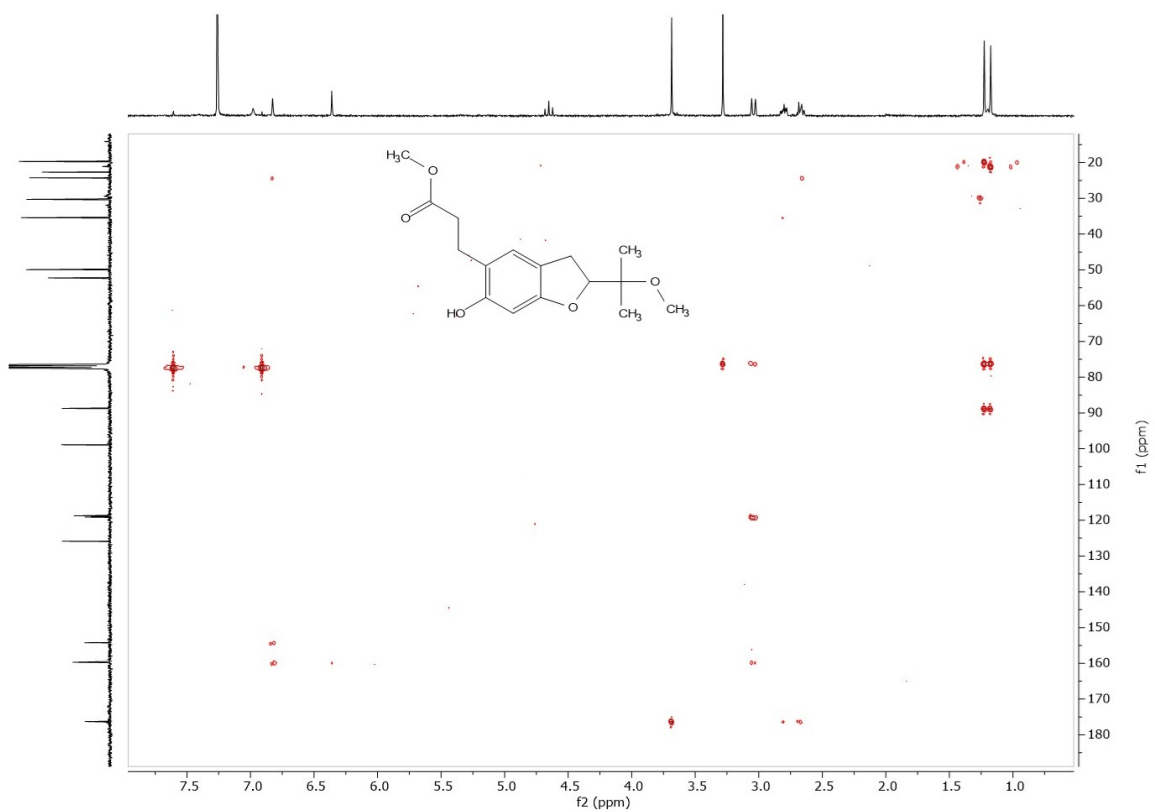

Figure S38. HMBC spectrum of compound **31** in  $\text{CDCl}_3$ .

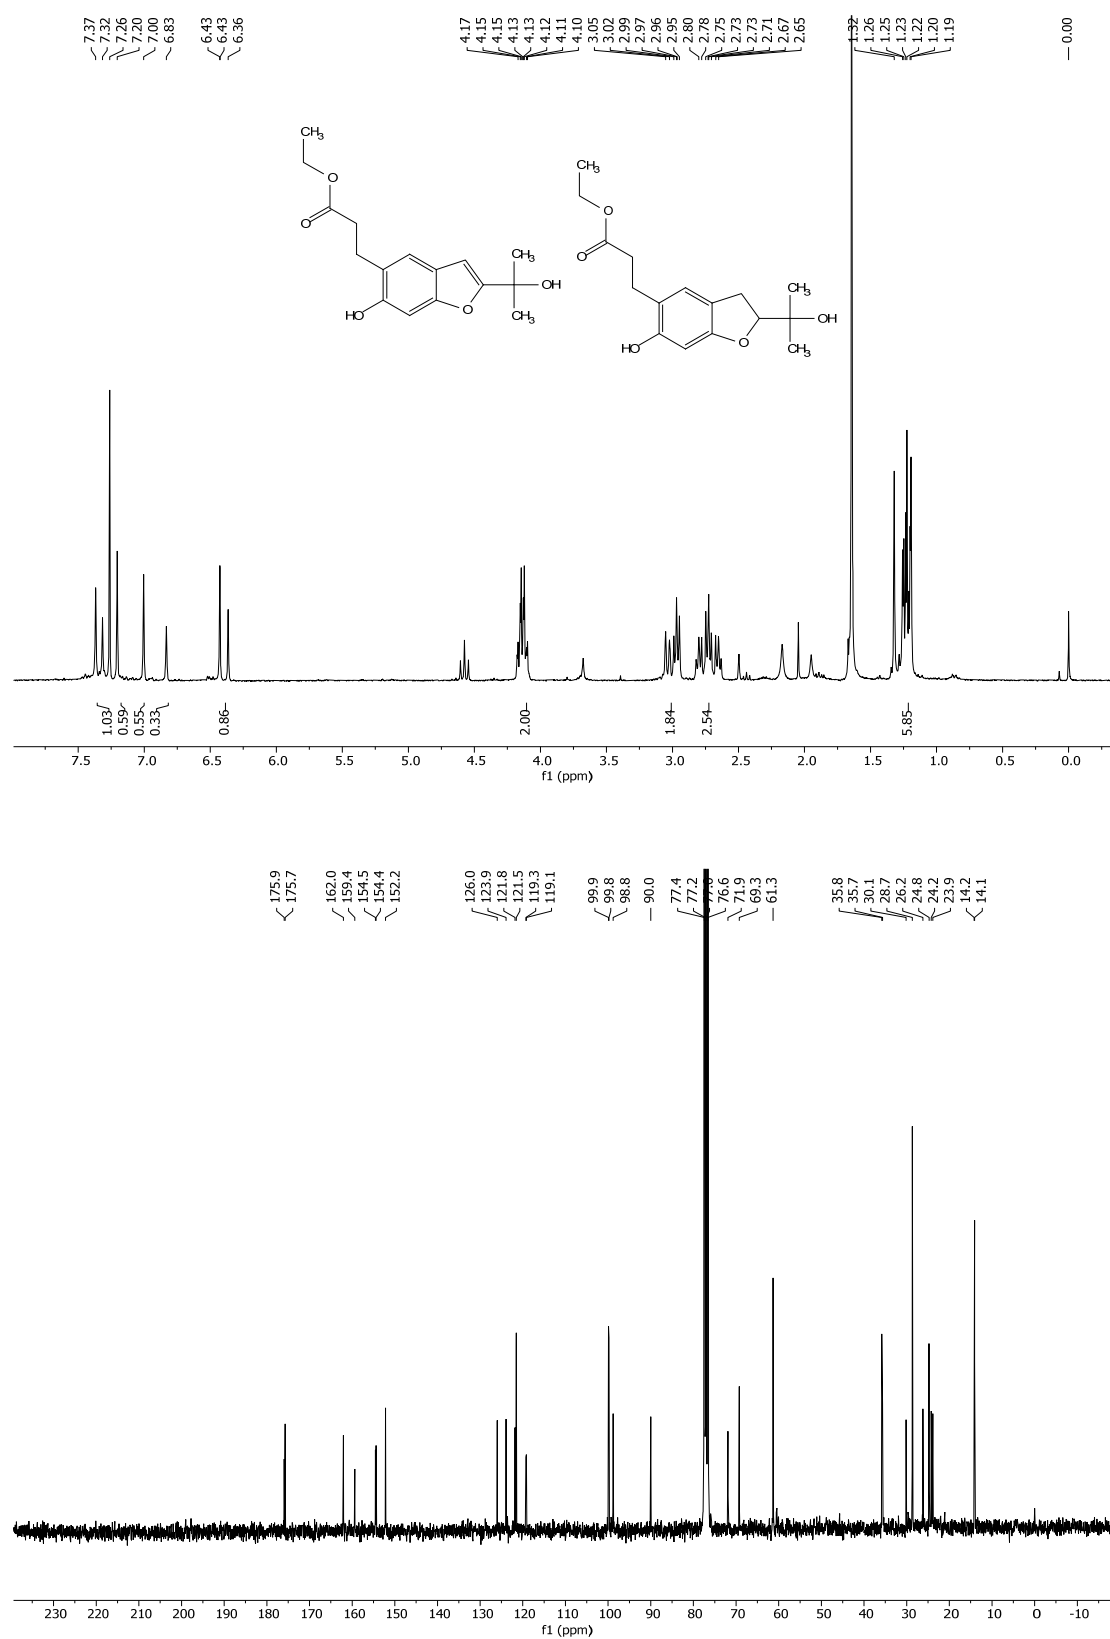

Figure S39. 400 MHz  $^1\text{H}$  (top) and 101 MHz  $^{13}\text{C}$  (bottom) NMR spectra of **32a,b** in  $\text{CDCl}_3$ .

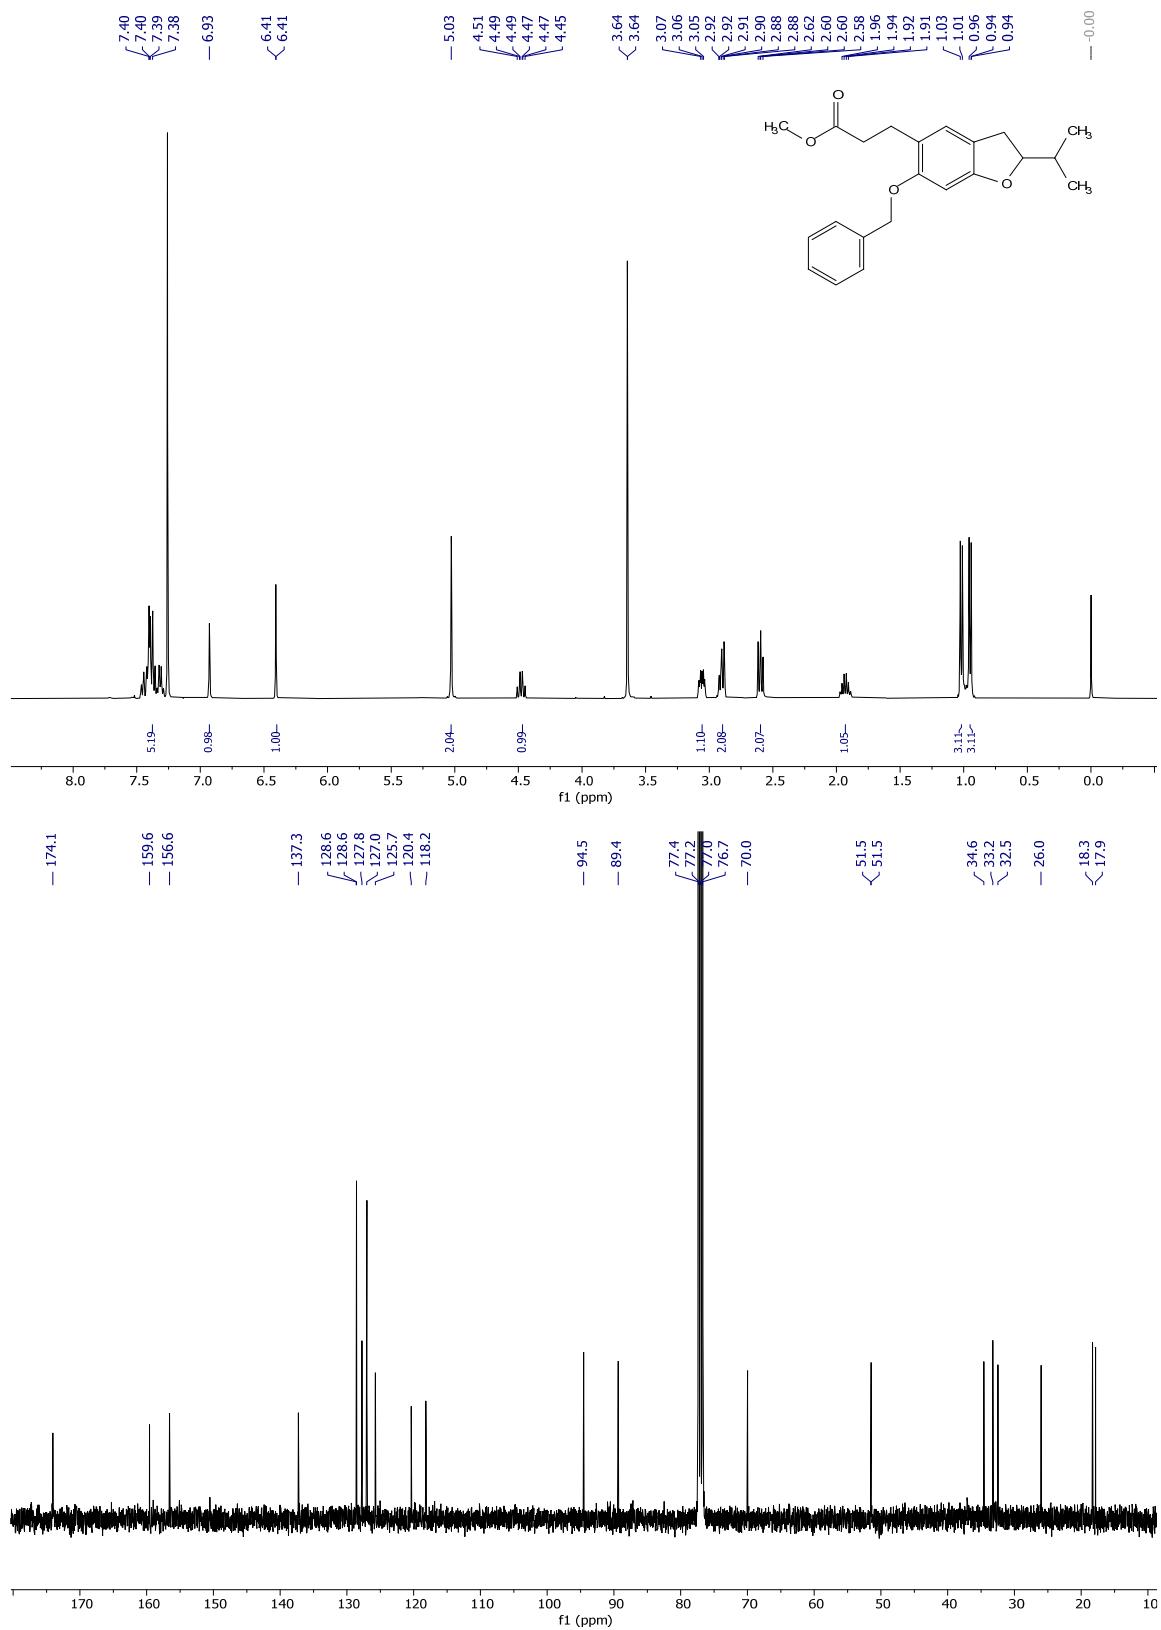

Figure S40. 300 MHz <sup>1</sup>H (top) and 75 MHz <sup>13</sup>C (bottom) NMR spectra of **34** in CDCl<sub>3</sub>.

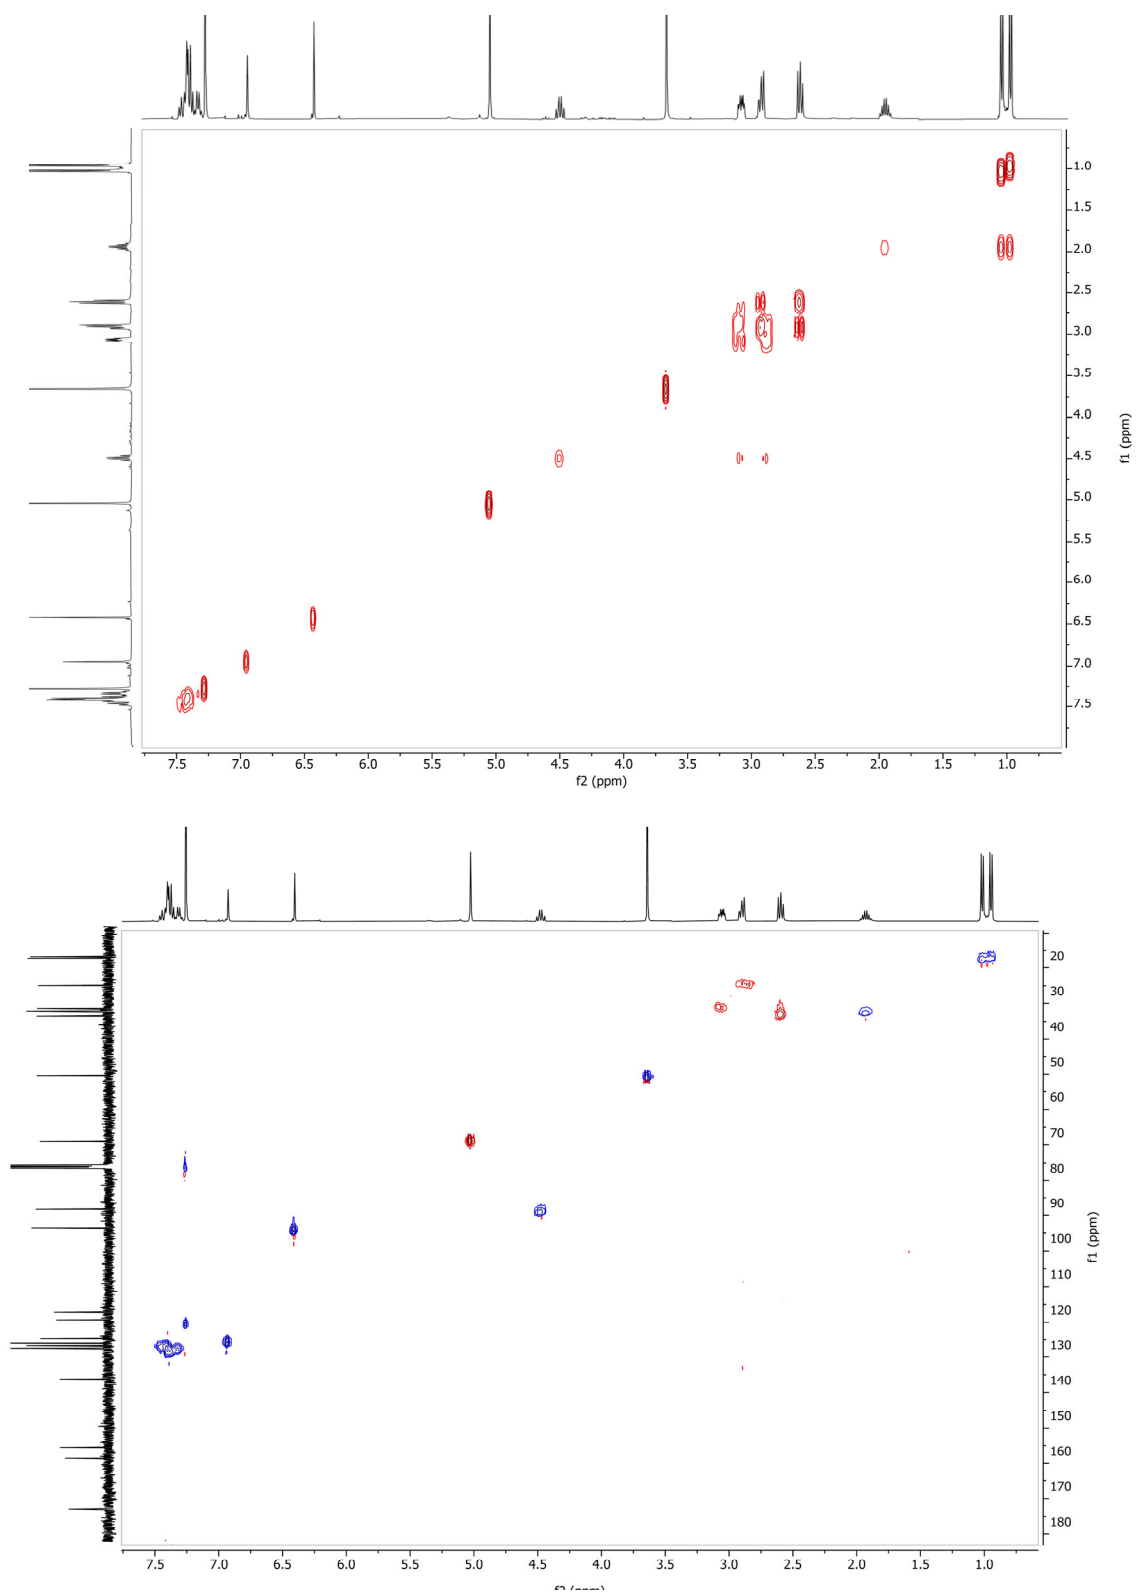

Figure S41. COSY (top) and HSQC (bottom) spectra of compound **34** in CDCl<sub>3</sub>.

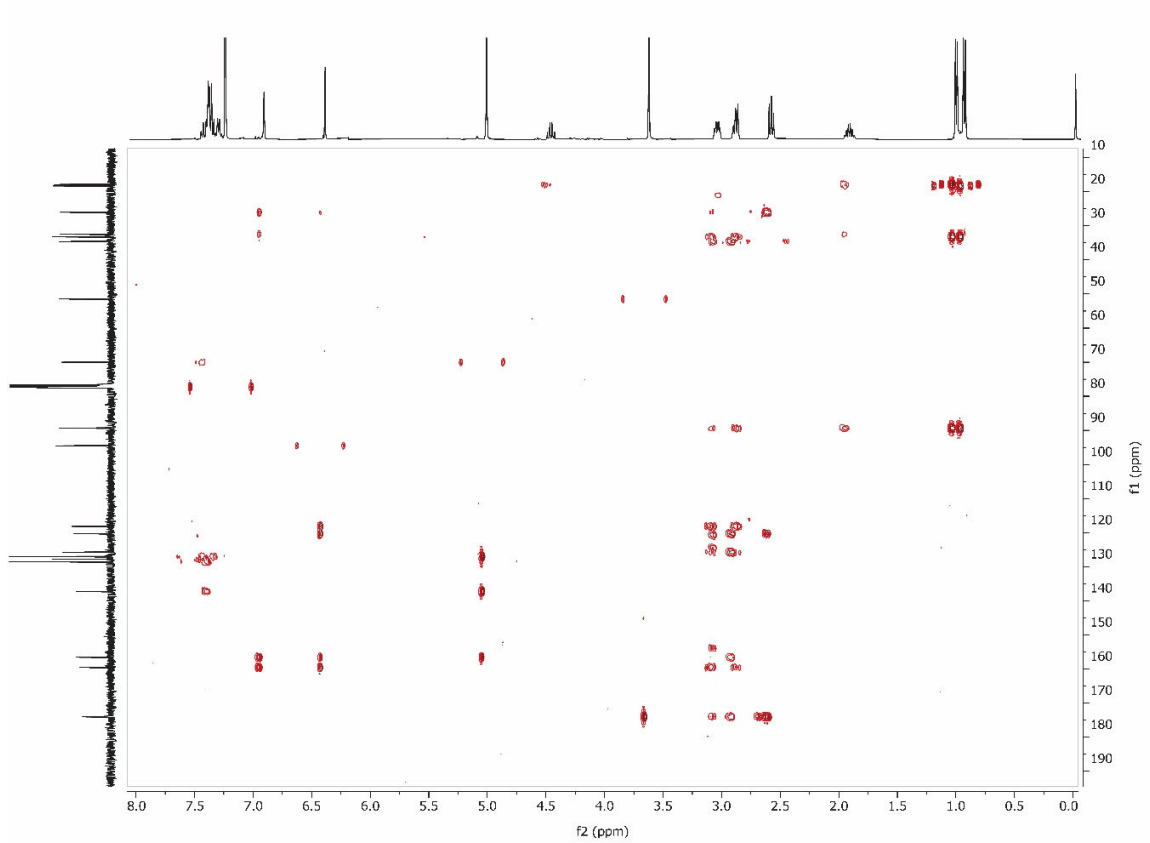

Figure S42. HMBC spectrum of compound **34** in  $\text{CDCl}_3$ .

**Table S1.** Comparison of  $^1\text{H}$  and  $^{13}\text{C}$  NMR spectra of the natural and synthetic products.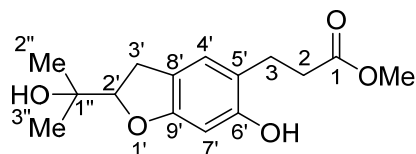

| Position<br>N <sup>o</sup> | $^1\text{H}$ NMR (DMSO- <i>d</i> <sub>6</sub> , 400 MHz) |                                              | $^{13}\text{C}$ NMR (DMSO- <i>d</i> <sub>6</sub> , 101 MHz) |           | $\Delta\delta_{\text{C}}$<br>(ppm) |
|----------------------------|----------------------------------------------------------|----------------------------------------------|-------------------------------------------------------------|-----------|------------------------------------|
|                            | Natural product                                          | Synthetic                                    | Natural product                                             | Synthetic |                                    |
| 1                          | -                                                        | -                                            | 173.1                                                       | 173.0     | 0.1                                |
| 2                          | 2.47 (t, 2H) <sup>a,b</sup>                              | 2.47 (t, <i>J</i> = 8.4, 2H) <sup>a</sup>    | 33.9                                                        | 33.8      | 0.1                                |
| 3                          | 2.66 (m, 2H)                                             | 2.66 (t, <i>J</i> = 8.4, 2H)                 | 25.3                                                        | 25.2      | 0.1                                |
| 2'                         | 4.44 (t, <i>J</i> = 8.3, 1H)                             | 4.44 (t, <i>J</i> = 8.7, 1H)                 | 89.4                                                        | 89.3      | 0.1                                |
| 3'                         | 2.94 (t, <i>J</i> = 8.3, 2H)                             | 2.94 (t, <i>J</i> = 8.7, 2H)                 | 29.5                                                        | 29.4      | 0.1                                |
| 4'                         | 6.80 (s, 1H)                                             | 6.81 (s, 1H)                                 | 125.2                                                       | 125.1     | 0.1                                |
| 5'                         | -                                                        | -                                            | 117.6                                                       | 117.5     | 0.1                                |
| 6'                         | -                                                        | -                                            | 154.6                                                       | 154.5     | 0.1                                |
| 7'                         | 6.19 (s, 1H)                                             | 6.19 (s, 1H)                                 | 96.5                                                        | 96.3      | 0.2                                |
| 8'                         | -                                                        | -                                            | 159.0                                                       | 159.0     | 0.0                                |
| 9'                         | -                                                        | -                                            | 116.9                                                       | 116.7     | 0.2                                |
| 1''                        | -                                                        | -                                            | 70.1                                                        | 70.0      | 0.1                                |
| 2''                        | 1.10 (s, 3H)                                             | 1.10 (s, 3H)                                 | 26.0                                                        | 26.0      | 0.0                                |
| 3''                        | 1.08 (s, 3H)                                             | 1.08 (s, 3H)                                 | 24.7                                                        | 24.6      | 0.1                                |
| 1''-OH                     | 4.52 <sup>b</sup> (s, 1H)                                | 4.51 (bs, 1H, <i>w</i> <sub>1/2</sub> = 2.6) | -                                                           | -         | -                                  |
| 6'-OH                      | 9.18 (s, 1H)                                             | 9.18 (s, 1H)                                 | -                                                           | -         | -                                  |
| OMe                        | 3.57 (s, 3H)                                             | 3.57 (s, 3H)                                 | 51.1                                                        | 51.1      | 0.0                                |

<sup>a</sup> Overlapped signal.<sup>b</sup> Data taken from the spectrum shown in the supplementary material.

**Table S2.** Crystal data and structure refinement for compound **27**.

|                                   |                                             |                              |
|-----------------------------------|---------------------------------------------|------------------------------|
| Empirical formula                 | C17 H13 I O3                                |                              |
| Formula weight                    | 392.17                                      |                              |
| Temperature                       | 298(2) K                                    |                              |
| Wavelength                        | 0.71073 Å                                   |                              |
| Crystal system                    | Monoclinic                                  |                              |
| Space group                       | P 21/c                                      |                              |
| Unit cell dimensions              | a = 17.2784(6) Å                            | $\alpha = 90^\circ$          |
|                                   | b = 7.6648(3) Å                             | $\beta = 105.1900(10)^\circ$ |
|                                   | c = 12.0994(4) Å                            | $\gamma = 90^\circ$          |
| Volume                            | 1546.41(10) Å <sup>3</sup>                  |                              |
| Z                                 | 4                                           |                              |
| Density (calculated)              | 1.684 Mg/m <sup>3</sup>                     |                              |
| Absorption coefficient            | 2.077 mm <sup>-1</sup>                      |                              |
| F(000)                            | 768                                         |                              |
| Crystal size                      | 0.377 x 0.283 x 0.072 mm <sup>3</sup>       |                              |
| Theta range for data collection   | 2.443 to 26.491°                            |                              |
| Reflections collected             | 36185                                       |                              |
| Independent reflections           | 3184 [R(int) = 0.0607]                      |                              |
| Completeness to theta = 25.242°   | 99.9 %                                      |                              |
| Absorption correction             | Semi-empirical from equivalents             |                              |
| Refinement method                 | Full-matrix least-squares on F <sup>2</sup> |                              |
| Data / restraints / parameters    | 3184 / 0 / 191                              |                              |
| Goodness-of-fit on F <sup>2</sup> | 1.074                                       |                              |
| Final R indices [I > 2sigma(I)]   | R1 = 0.0448, wR2 = 0.0935                   |                              |
| R indices (all data)              | R1 = 0.0717, wR2 = 0.1154                   |                              |

**Table S3.** Bond lengths [Å] for compound **27**.

---

|              |          |
|--------------|----------|
| C(2)-C(3)    | 1.343(7) |
| C(2)-O(1)    | 1.391(6) |
| C(2)-C(19)   | 1.461(7) |
| C(3)-C(4)    | 1.424(7) |
| C(3)-H(3)    | 0.9300   |
| O(1)-C(9)    | 1.372(6) |
| C(4)-C(9)    | 1.385(6) |
| C(4)-C(5)    | 1.398(7) |
| C(5)-C(6)    | 1.374(7) |
| C(5)-H(5)    | 0.9300   |
| C(6)-C(7)    | 1.418(6) |
| C(6)-I(18)   | 2.098(5) |
| C(7)-O(10)   | 1.362(6) |
| C(7)-C(8)    | 1.379(7) |
| C(8)-C(9)    | 1.375(7) |
| C(8)-H(8)    | 0.9300   |
| O(10)-C(11)  | 1.428(6) |
| C(11)-C(12)  | 1.498(7) |
| C(11)-H(11A) | 0.9700   |
| C(11)-H(11B) | 0.9700   |
| C(12)-C(17)  | 1.380(7) |
| C(12)-C(13)  | 1.388(7) |
| C(13)-C(14)  | 1.373(8) |
| C(13)-H(13)  | 0.9300   |
| C(14)-C(15)  | 1.367(8) |
| C(14)-H(14)  | 0.9300   |
| C(15)-C(16)  | 1.379(8) |
| C(15)-H(15)  | 0.9300   |
| C(16)-C(17)  | 1.384(8) |
| C(16)-H(16)  | 0.9300   |
| C(17)-H(17)  | 0.9300   |
| C(19)-O(20)  | 1.211(6) |
| C(19)-C(21)  | 1.501(8) |
| C(21)-H(21A) | 0.9600   |
| C(21)-H(21B) | 0.9600   |
| C(21)-H(21C) | 0.9600   |

---

**Table S4.** Bond angles [°] for compound **27**.

---

|                     |          |
|---------------------|----------|
| C(3)-C(2)-O(1)      | 111.1(4) |
| C(3)-C(2)-C(19)     | 133.7(5) |
| O(1)-C(2)-C(19)     | 115.2(4) |
| C(2)-C(3)-C(4)      | 107.2(4) |
| C(2)-C(3)-H(3)      | 126.4    |
| C(4)-C(3)-H(3)      | 126.4    |
| C(9)-O(1)-C(2)      | 105.5(4) |
| C(9)-C(4)-C(5)      | 118.1(5) |
| C(9)-C(4)-C(3)      | 105.8(4) |
| C(5)-C(4)-C(3)      | 136.1(5) |
| C(6)-C(5)-C(4)      | 118.3(4) |
| C(6)-C(5)-H(5)      | 120.8    |
| C(4)-C(5)-H(5)      | 120.8    |
| C(5)-C(6)-C(7)      | 121.9(5) |
| C(5)-C(6)-I(18)     | 119.7(4) |
| C(7)-C(6)-I(18)     | 118.4(4) |
| O(10)-C(7)-C(8)     | 124.2(4) |
| O(10)-C(7)-C(6)     | 115.7(4) |
| C(8)-C(7)-C(6)      | 120.1(4) |
| C(9)-C(8)-C(7)      | 116.4(4) |
| C(9)-C(8)-H(8)      | 121.8    |
| C(7)-C(8)-H(8)      | 121.8    |
| O(1)-C(9)-C(8)      | 124.4(4) |
| O(1)-C(9)-C(4)      | 110.4(4) |
| C(8)-C(9)-C(4)      | 125.1(5) |
| C(7)-O(10)-C(11)    | 117.4(4) |
| O(10)-C(11)-C(12)   | 109.4(4) |
| O(10)-C(11)-H(11A)  | 109.8    |
| C(12)-C(11)-H(11A)  | 109.8    |
| O(10)-C(11)-H(11B)  | 109.8    |
| C(12)-C(11)-H(11B)  | 109.8    |
| H(11A)-C(11)-H(11B) | 108.2    |
| C(17)-C(12)-C(13)   | 118.4(5) |
| C(17)-C(12)-C(11)   | 122.1(4) |
| C(13)-C(12)-C(11)   | 119.5(5) |
| C(14)-C(13)-C(12)   | 121.2(5) |
| C(14)-C(13)-H(13)   | 119.4    |
| C(12)-C(13)-H(13)   | 119.4    |
| C(15)-C(14)-C(13)   | 120.0(5) |
| C(15)-C(14)-H(14)   | 120.0    |
| C(13)-C(14)-H(14)   | 120.0    |
| C(14)-C(15)-C(16)   | 119.8(5) |
| C(14)-C(15)-H(15)   | 120.1    |

|                     |          |
|---------------------|----------|
| C(16)-C(15)-H(15)   | 120.1    |
| C(15)-C(16)-C(17)   | 120.3(6) |
| C(15)-C(16)-H(16)   | 119.9    |
| C(17)-C(16)-H(16)   | 119.9    |
| C(12)-C(17)-C(16)   | 120.3(5) |
| C(12)-C(17)-H(17)   | 119.8    |
| C(16)-C(17)-H(17)   | 119.8    |
| O(20)-C(19)-C(2)    | 121.9(5) |
| O(20)-C(19)-C(21)   | 120.8(5) |
| C(2)-C(19)-C(21)    | 117.3(5) |
| C(19)-C(21)-H(21A)  | 109.5    |
| C(19)-C(21)-H(21B)  | 109.5    |
| H(21A)-C(21)-H(21B) | 109.5    |
| C(19)-C(21)-H(21C)  | 109.5    |
| H(21A)-C(21)-H(21C) | 109.5    |
| H(21B)-C(21)-H(21C) | 109.5    |

---

Symmetry transformations used to generate equivalent atoms:

**Table S5.** Torsion angles [°] for compound **27**.

---

|                         |           |
|-------------------------|-----------|
| O(1)-C(2)-C(3)-C(4)     | 0.1(6)    |
| C(19)-C(2)-C(3)-C(4)    | -177.9(6) |
| C(3)-C(2)-O(1)-C(9)     | 0.5(6)    |
| C(19)-C(2)-O(1)-C(9)    | 178.9(4)  |
| C(2)-C(3)-C(4)-C(9)     | -0.6(6)   |
| C(2)-C(3)-C(4)-C(5)     | 179.1(6)  |
| C(9)-C(4)-C(5)-C(6)     | 0.7(7)    |
| C(3)-C(4)-C(5)-C(6)     | -179.0(6) |
| C(4)-C(5)-C(6)-C(7)     | -2.2(8)   |
| C(4)-C(5)-C(6)-I(18)    | 178.8(4)  |
| C(5)-C(6)-C(7)-O(10)    | -177.3(5) |
| I(18)-C(6)-C(7)-O(10)   | 1.7(6)    |
| C(5)-C(6)-C(7)-C(8)     | 2.6(8)    |
| I(18)-C(6)-C(7)-C(8)    | -178.3(4) |
| O(10)-C(7)-C(8)-C(9)    | 178.5(5)  |
| C(6)-C(7)-C(8)-C(9)     | -1.4(7)   |
| C(2)-O(1)-C(9)-C(8)     | 179.8(5)  |
| C(2)-O(1)-C(9)-C(4)     | -0.9(5)   |
| C(7)-C(8)-C(9)-O(1)     | 179.0(5)  |
| C(7)-C(8)-C(9)-C(4)     | -0.1(8)   |
| C(5)-C(4)-C(9)-O(1)     | -178.8(4) |
| C(3)-C(4)-C(9)-O(1)     | 1.0(6)    |
| C(5)-C(4)-C(9)-C(8)     | 0.4(8)    |
| C(3)-C(4)-C(9)-C(8)     | -179.8(5) |
| C(8)-C(7)-O(10)-C(11)   | -7.1(7)   |
| C(6)-C(7)-O(10)-C(11)   | 172.8(4)  |
| C(7)-O(10)-C(11)-C(12)  | -166.2(4) |
| O(10)-C(11)-C(12)-C(17) | 26.7(7)   |
| O(10)-C(11)-C(12)-C(13) | -156.9(5) |
| C(17)-C(12)-C(13)-C(14) | 0.7(8)    |
| C(11)-C(12)-C(13)-C(14) | -175.8(5) |
| C(12)-C(13)-C(14)-C(15) | -0.5(9)   |
| C(13)-C(14)-C(15)-C(16) | 0.8(10)   |
| C(14)-C(15)-C(16)-C(17) | -1.2(10)  |
| C(13)-C(12)-C(17)-C(16) | -1.2(8)   |
| C(11)-C(12)-C(17)-C(16) | 175.2(5)  |
| C(15)-C(16)-C(17)-C(12) | 1.5(10)   |
| C(3)-C(2)-C(19)-O(20)   | 178.6(6)  |
| O(1)-C(2)-C(19)-O(20)   | 0.6(8)    |
| C(3)-C(2)-C(19)-C(21)   | -0.9(9)   |
| O(1)-C(2)-C(19)-C(21)   | -178.9(5) |

---

Symmetry transformations used to generate equivalent atoms:

**Table S6.** Hydrogen bonds for compound **27** [ $\text{\AA}$  and  $^\circ$ ].

| D-H...A                | d(D-H) | d(H...A) | d(D...A) | $\angle(\text{DHA})$ |
|------------------------|--------|----------|----------|----------------------|
| C(5)-H(5)...O(1)#1     | 0.93   | 2.64     | 3.489(6) | 152.3                |
| C(8)-H(8)...O(20)#2    | 0.93   | 2.59     | 3.226(6) | 126.0                |
| C(11)-H(11B)...O(20)#2 | 0.97   | 2.64     | 3.560(7) | 157.7                |

Symmetry transformations used to generate equivalent atoms:

#1  $x, -y+1/2, z+1/2$  #2  $-x+1, y+1/2, -z+1/2$

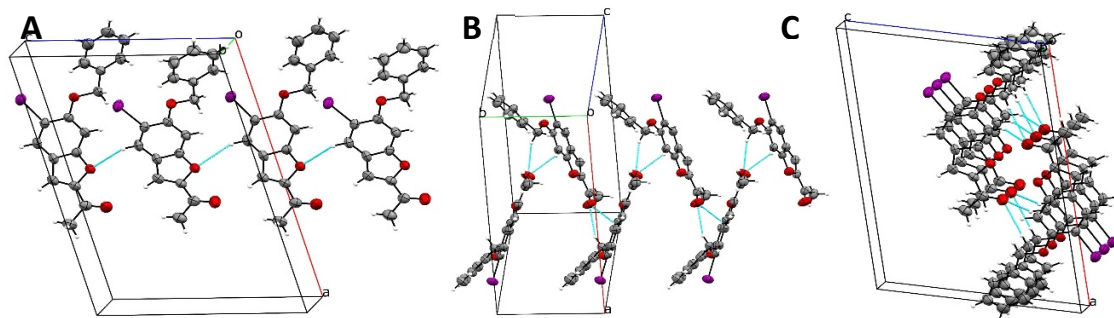

**Figure S35.** Supramolecular structure of compound **27**. A) The 1D chain extends via C5–H5···O1 bonds ( $x, -y+1/2, z+1/2$ ) running along the  $c$ -axis. The hydrogen bonds are shown with cyan lines. B) The interactions C8–H8···O20 and C11–H11B···O20 ( $-x+1, y+1/2, -z+1/2$ ) generate a zigzag chain along the  $b$ -axis. C) The previous interaction in the view direction  $[1\ 0\ 1]$ .

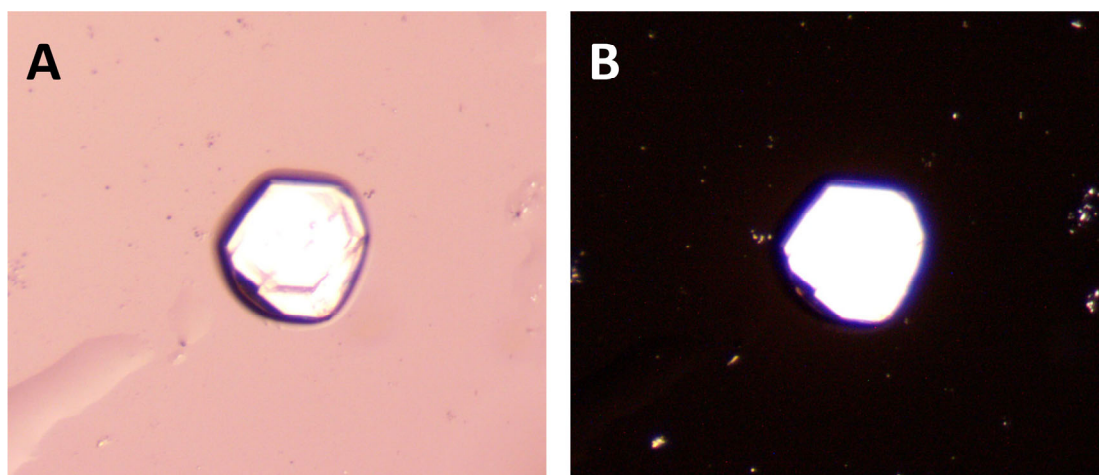

**Figure S36.** View of a crystal of compound **27** at  $5\times$  magnification under white (A) and polarized (B) light.

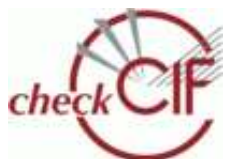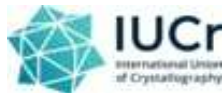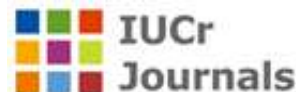

## checkCIF/PLATON report

Structure factors have been supplied for datablock(s) NLC\_047\_A\_2\_0ma\_a

THIS REPORT IS FOR GUIDANCE ONLY. IF USED AS PART OF A REVIEW PROCEDURE FOR PUBLICATION, IT SHOULD NOT REPLACE THE EXPERTISE OF AN EXPERIENCED CRYSTALLOGRAPHIC REFEREE.

No syntax errors found.      CIF dictionary      Interpreting this report

### Datablock: NLC\_047\_A\_2\_0ma\_a

---

|                        |                |                    |               |
|------------------------|----------------|--------------------|---------------|
| Bond precision:        | C-C = 0.0075 Å | Wavelength=0.71073 |               |
| Cell:                  | a=17.2784 (6)  | b=7.6648 (3)       | c=12.0994 (4) |
|                        | alpha=90       | beta=105.190 (1)   | gamma=90      |
| Temperature:           | 298 K          |                    |               |
|                        | Calculated     | Reported           |               |
| Volume                 | 1546.41 (10)   | 1546.41 (10)       |               |
| Space group            | P 21/c         | P 21/c             |               |
| Hall group             | -P 2ybc        | -P 2ybc            |               |
| Moiety formula         | C17 H13 I O3   | C17 H13 I O3       |               |
| Sum formula            | C17 H13 I O3   | C17 H13 I O3       |               |
| Mr                     | 392.17         | 392.17             |               |
| Dx, g cm <sup>-3</sup> | 1.684          | 1.684              |               |
| Z                      | 4              | 4                  |               |
| Mu (mm <sup>-1</sup> ) | 2.077          | 2.077              |               |
| F000                   | 768.0          | 768.0              |               |
| F000'                  | 766.43         |                    |               |
| h, k, lmax             | 21, 9, 15      | 21, 9, 15          |               |
| Nref                   | 3198           | 3184               |               |
| Tmin, Tmax             | 0.499, 0.861   | 0.499, 0.861       |               |
| Tmin'                  | 0.452          |                    |               |

Correction method= # Reported T Limits: Tmin=0.499 Tmax=0.861  
AbsCorr = MULTI-SCAN

Data completeness= 0.996

Theta(max)= 26.491

R(reflections)= 0.0448( 2330)

wR2(reflections)=  
0.1154( 3184)

S = 1.074

Npar= 191

---

The following ALERTS were generated. Each ALERT has the format

**test-name\_ALERT\_alert-type\_alert-level.**

Click on the hyperlinks for more details of the test.

---

**Alert level C**

|                   |                                                  |        |        |
|-------------------|--------------------------------------------------|--------|--------|
| PLAT905_ALERT_3_C | Negative K value in the Analysis of Variance ... | -2.905 | Report |
| PLAT911_ALERT_3_C | Missing FCF Refl Between Thmin & STh/L= 0.600    | 2      | Report |
|                   | 0 1 1, 1 0 2,                                    |        |        |

---

**Alert level G**

|                   |                                                             |              |
|-------------------|-------------------------------------------------------------|--------------|
| PLAT066_ALERT_1_G | Predicted and Reported Tmin&Tmax Range Identical            | ? Check      |
| PLAT083_ALERT_2_G | SHELXL Second Parameter in WGHT Unusually Large             | 6.56 Why ?   |
| PLAT398_ALERT_2_G | Deviating C-O-C Angle From 120 for O1                       | 105.5 Degree |
| PLAT480_ALERT_4_G | Long H...A H-Bond Reported H5 ..01                          | 2.64 Ang.    |
| PLAT480_ALERT_4_G | Long H...A H-Bond Reported H11B ..020                       | 2.64 Ang.    |
| PLAT883_ALERT_1_G | Absent Datum for _atom_sites_solution_primary ..            | Please Do !  |
| PLAT910_ALERT_3_G | Missing FCF Reflection(s) Below Theta(Min) [Deg]=<br>1 0 0, | 2.44 Note    |
| PLAT912_ALERT_4_G | Missing # of FCF Reflections Above STh/L= 0.600             | 12 Note      |
| PLAT965_ALERT_2_G | The SHELXL WEIGHT Optimisation has not Converged            | Please Check |
| PLAT969_ALERT_5_G | The 'Henn et al.' R-Factor-gap value .....                  | 4.174 Note   |
|                   | Predicted wR2: Based on SigI**2 2.76 or SHELX Weight 10.74  |              |
| PLAT978_ALERT_2_G | Number C-C Bonds with Positive Residual Density.            | 1 Info       |

---

- 0 **ALERT level A** = Most likely a serious problem - resolve or explain  
0 **ALERT level B** = A potentially serious problem, consider carefully  
2 **ALERT level C** = Check. Ensure it is not caused by an omission or oversight  
11 **ALERT level G** = General information/check it is not something unexpected
- 2 ALERT type 1 CIF construction/syntax error, inconsistent or missing data  
4 ALERT type 2 Indicator that the structure model may be wrong or deficient  
3 ALERT type 3 Indicator that the structure quality may be low  
3 ALERT type 4 Improvement, methodology, query or suggestion  
1 ALERT type 5 Informative message, check
- 

It is advisable to attempt to resolve as many as possible of the alerts in all categories. Often the minor alerts point to easily fixed oversights, errors and omissions in your CIF or refinement strategy, so attention to these fine details can be worthwhile. It is up to the individual to critically assess their own results and, if necessary, seek expert advice.

## duplicate check

No duplication found

Datablock NLC\_047\_A\_2\_0ma\_a - ellipsoid plot

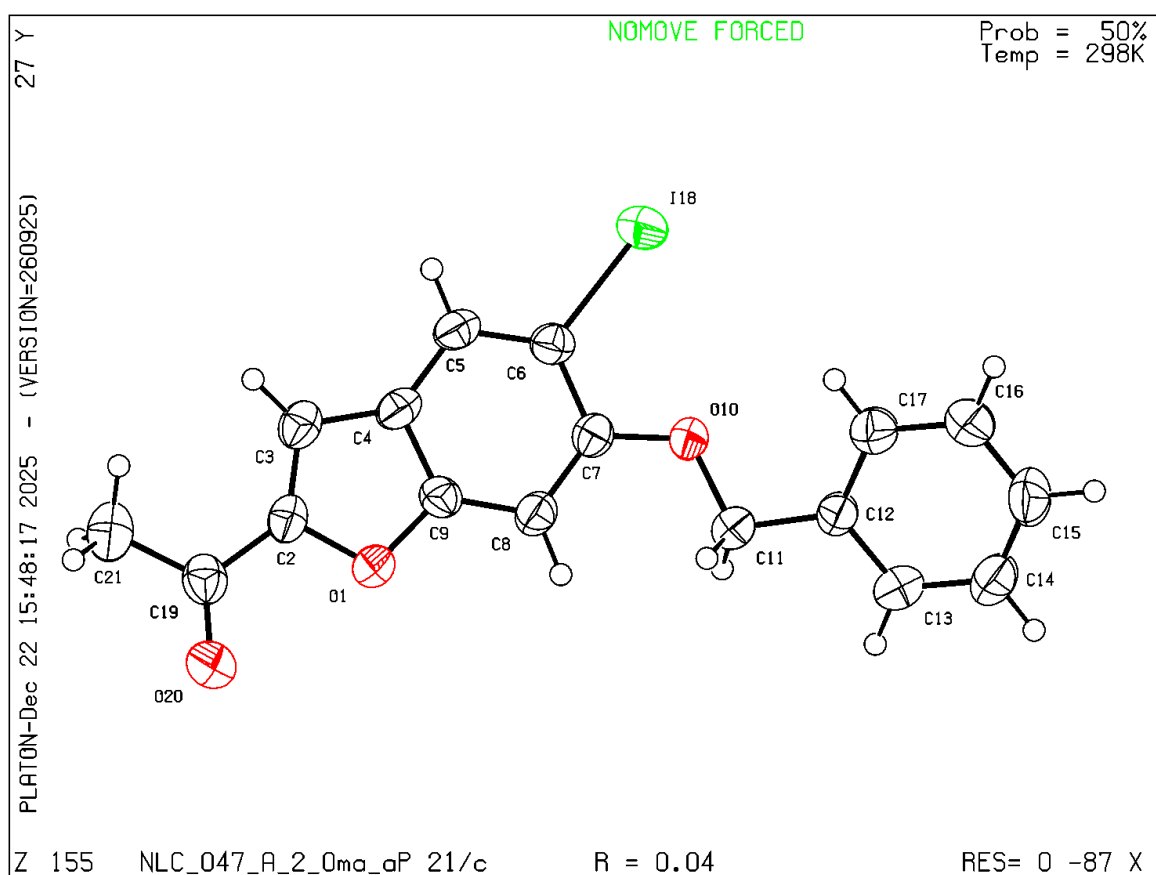

Supplement: d6ob00365f1.pdf [file d6ob00365f1.pdf]
